# Supplementary material for: The Condition-Dependent Transcriptional Landscape of Burkholderia pseudomallei
Source: PLoS Genet. 2013 Sep 12;9(9):e1003795. doi: 10.1371/journal.pgen.1003795 (PMC3772027; doi:10.1371/journal.pgen.1003795)
Supplement: Table S1 — Details of conditions used for Burkholderia pseudomallei transcriptome. (XLS) [file pgen.1003795.s009.xls]

## Sheet: (A) Condition Classification
Table S1. Details of conditions used for Burkholderia pseudomallei transcriptome.
(A) Classification of conditions used in the study.
No.	Conditions		No. of Expts
1	General	Growth (liquid medium)	9
2		Growth (Plate culture)	1
3		Anaerobic condition	4
4		Desiccation and Rehydration	3
5		Amino acid supplement	4
6		Divalent cations supplement	6
7		Iron supplement	2
8		Human factors supplement	3
9	Stress	Temperature Stress	8
10		Osmotic Stress	3
11		UV Irradiation	4
12		Nutrient Deprivation	4
13		Antibiotics treatment	3
14		Acid and Alkali*	2
15		Oxidative Stress	4
16		Heavy Metals	5
17	Infection	In vitro	3
18		In vivo	1
19	Mutants	Sigma factor	6
20		Quorum sensing	2
21		T3SS3	5
		Total no. of expts	82
*Alkali treatment resulted in total lysis of bacterial cells, thus condition was not profiled on the arrays.

## Sheet: (B) Experimental Setup
(B) Experimental details and scientific basis of each condition.
No.	General Condition	Bacterial Strain	Specific Condition	Medium	Details	Condition name	No. of replicates	Duration of incubation	rpm	Temp of incubation	Description	Experimental basis	References / Similar conditions used in papers
	GENERAL
1	Growth (liquid medium)	BpK96243	Rich medium	Luria-Bertani broth (LB)	Stationary phase; Reference mRNA for ALL samples.	K9LBS	2	30hrs	70	37°C	Bacteria subjected to growth in LB. Harvested at stationary phase (OD600 = 2.0).	Common condition used for culturing bacteria in laboratory settings.	Refs 1, 2.
					Mid-Logarithmic phase	K9LBML	3	8hrs	70	37°C	Bacteria subjected to growth in LB. Harvested at log phase (OD600 = 0.8).	Common condition used for culturing bacteria in laboratory settings.	Refs 2, 3.
					Early Stationary phase	K9LBES	3	22hrs	70	37°C	Bacteria subjected to growth in LB. Harvested at early-stationary phase (OD600 = 1.8).	Common condition used for culturing bacteria in laboratory settings.	Refs 1, 2.
			Minimal medium	Chemically Defined Medium (CDM)*	Mid-Logarithmic phase	K9CDMML	3	8hrs	70	37°C	Bacteria subjected to growth in CDM. Harvested at log phase (OD600 = 0.2).	Minimal medium used for common culturing of bacteria in laboratory settings.	Refs 4, 5, 6.
					Early Stationary phase	K9CDMES	3	17hrs	70	37°C	Bacteria subjected to growth in CDM. Harvested at early-stationary phase (OD600 = 0.5).	Minimal medium used for common culturing of bacteria in laboratory settings.	Refs 4, 5, 6.
		Bp22	Rich medium	LB	Mid-Logarithmic phase	Bp22LBML	2	8hrs	70	37°C	Bacteria subjected to growth in LB. Harvested at log phase (OD600 = 0.8).	Common condition used for culturing bacteria in laboratory settings.	Refs 2, 3.
					Early Stationary phase	Bp22LBES	2	22hrs	70	37°C	Bacteria subjected to growth in LB. Harvested at early-stationary phase (OD600 = 1.8).	Common condition used for culturing bacteria in laboratory settings.	Refs 1, 2.
			Minimal medium	CDM	Mid-Logarithmic phase	Bp22CDMML	2	8hrs	70	37°C	Bacteria subjected to growth in CDM. Harvested at log phase (OD600 = 0.2).	Minimal medium used for common culturing of bacteria in laboratory settings.	Refs 4, 5, 6.
					Early Stationary phase	Bp22CDMES	2	17hrs	70	37°C	Bacteria subjected to growth in CDM. Harvested at early-stationary phase (OD600 = 0.5).	Minimal medium used for common culturing of bacteria in laboratory settings.	Refs 4, 5, 6.
2	Growth (Plate culture)	BpK96243	Bacterial lawn, Solid-air interface biofilm	Luria-Bertani Agar (LA)	10^7 cfu/ml plated out on LA and incubated for 48hrs	K9Plate	2	48hrs	Static	37°C	Bacteria grown to log phase in LB, pelleted and resuspended. 10^7 cfu/ml plated out (lawn) on LA and grown simultaneously.	Common condition used for culturing bacteria in laboratory settings.	-
3	Anaerobic condition	BpK96243	Aerobic culture, 1 week	LB	Normal incubation oven, 1 week	K9Aer1wk	2	1 week	Static	37°C	Bacteria grown to log phase in LB, transfer to 50ml TPP tubes, continue incubation under static conditions for 1 week.	Bp is known as an aerobe. Common condition used for culturing aerobic bacteria in laboratoriy settings.	-
			Anaerobic culture, 1 week	LB	Devoid of oxygen in Oxoid Anaerobic Jar, 1 week	K9Anaer1wk	2	1 week	Static	37°C	Bacteria grown to log phase in LB, transfer to 50ml TPP tubes into anaerobic jar and incubated at 37C for 1 week.	Mimicking host and microenvironemnts that limit aerobic respiration.	Ref 7
			Aerobic culture, 2 weeks	LB	Normal incubation oven, 2 weeks	K9Aer2wks	2	2 weeks	Static	37°C	Bacteria grown to log phase in LB, transfer to 50ml TPP tubes, continue incubation under static conditions for 2 weeks.	Bp is known as an aerobe. Common condition used for culturing aerobic bacteria in laboratoriy settings.	-
			Anaerobic culture, 2 weeks	LB	Devoid of oxygen in Oxoid Anaerobic Jar, 2 weeks	K9Anaer2wks	2	2 weeks	Static	37°C	Bacteria grown to log phase in LB, transfer to 50ml TPP tubes into anaerobic jar and incubated at 37C for 2 weeks.	Mimicking host and microenvironemnts that limit aerobic respiration.	Ref 7
4	Desiccation and Rehydration	BpK96243	Hydrated Bp pellet	LB	Pellet remains hydrated in dH2O.	K9DesRef	2	24hrs	Static	37°C	Bacteria grown to log phase in LB, pelleted and kept wet in dH2O for 24 hrs (not resuspended!)	Common condition used for broth cultures in laboratory settings.	-
			Desiccated Bp pellet	LB	Air-dried and cracked Bp pellet.	K9Des24hrs	2	24hrs	Static	37°C	Bacteria grown to log phase in LB, pelleted and incubated in oven (desiccation) for 24 hrs.	Bp exists in soil environments that undergo drastic hydration states, e.g. totally dry soils during dry season in Thailand.	Refs 8, 9, 10
			Rehydrated Bp pellet	LB	Air-dried and cracked Bp pellet rehydrated and revived in dH2O.	K9Revived	2	24hrs	Static	37°C	Bacteria grown to log phase in LB, pelleted and incubated in oven (desiccation) for 24 hrs then revived in 5ml H2O for 15mins (37C, 150rpm)	When the monsoon season arrives in Thailand, the dry soils are hydrated and the bacteria is reactivated in the soils.	Refs 8, 9, 10
5	Amino acid supplement (Taurine as a sulfur source)	BpK96243	250uM Na2SO4 (free sulfur source)	Modified M63**	Mid-Logarithmic phase	K9Na2SO4ML	2	24hrs	150	37°C	Bacteria grown to log phase in modified M63 medium with Na2SO4 as reference.	Bp is known to undergo sulfur metabolism (KEGG pathway); chemical sulfur source.	Ref 11
				Modified M63	Early Stationary phase	K9Na2SO4ES	2	48hrs	150	37°C	Bacteria grown to stationary phase in modified M63 medium with Na2SO4 as reference.	Bp is known to undergo sulfur metabolism (KEGG pathway); chemical sulfur source.	Ref 11
			250uM Taurine (amino acid sulfur source)	Modified M63	Mid-Logarithmic phase	K9TaurineML	2	24hrs	150	37°C	Bacteria grown to log phase in modified M63 medium with Taurine and harvested.	Bp is known to undergo sulfur metabolism (KEGG pathway); taurine as sulfur source; implications on mammalian infection.	Ref 5
				Modified M63	Early Stationary phase	K9TaurineES	2	48hrs	150	37°C	Bacteria grown to stationary phase in modified M63 medium with Taurine and harvested.	Bp is known to undergo sulfur metabolism (KEGG pathway); taurine as sulfur source; implications on mammalian infection.	Ref 5
6	Divalent cations supplement	BpK96243	Chelated medium (low cations content)	1XTSBDC***	Mid-Logarithmic phase	K91XTSBDCML	2	5 1/2 hrs	250	37°C	Bacteria subjected to growth in TSBDC. Harvested at log phase (OD600 = 0.8, 5 1/2hrs).	Reference condition used to culture Bp for study of effects of ions.	Ref 12
			200uM Ca2+	1XTSBDC	Mid-Logarithmic phase	K9Ca2+ML	2	5 1/2 hrs	250	37°C	Bacteria subjected to growth in TSBDC with 200uM Calcium chloride dihydrate. Harvested at log phase.	An extension to Ref 12. Inclusion of other divalent cations found in the soils and host microenvironments.	-
			200uM Mg2+	1XTSBDC	Mid-Logarithmic phase	K9Mg2+ML	2	5 1/2 hrs	250	37°C	Bacteria subjected to growth in TSBDC with 200uM Magnesium sulfate heptahydrate. Harvested at log phase.	An extension to Ref 12. Inclusion of other divalent cations found in the soils and host microenvironments.	-
			200uM Cu2+	1XTSBDC	Mid-Logarithmic phase	K9Cu2+ML	2	5 1/2 hrs	250	37°C	Bacteria subjected to growth in TSBDC with 200uM Copper (II) sulfate pentahydrate. Harvested at log phase.	An extension to Ref 12. Inclusion of other divalent cations found in the soils and host microenvironments.	-
			200uM Mn2+	1XTSBDC	Mid-Logarithmic phase	K9Mn2+ML	2	5 1/2 hrs	250	37°C	Bacteria subjected to growth in TSBDC with 200uM Manganese chloride tetrahydrate. Harvested at log phase.	An extension to Ref 12. Inclusion of other divalent cations found in the soils and host microenvironments.	-
			200uM Zn2+	1XTSBDC	Mid-Logarithmic phase	K9Zn2+ML	2	5 1/2 hrs	250	37°C	Bacteria subjected to growth in TSBDC with 200uM Zinc sulfate heptahydrate. Harvested at log phase.	An extension to Ref 12. Inclusion of other divalent cations found in the soils and host microenvironments.	-
7	Iron supplement	BpK96243	200uM Fe3+	1XTSBDC	Mid-Logarithmic phase	K9Fe3+ML	2	5 1/2 hrs	250	37°C	Bacteria subjected to growth in TSBDC with 200uM Fe(III) chloride hexahydrate. Harvested at log phase.	Iron regulation in Bp.	Ref 12
			200uM Fe3+	1XTSBDC	Stationary phase	K9Fe3+24hrs	2	24hrs	250	37°C	Bacteria subjected to growth in TSBDC with 200uM Fe(III) chloride hexahydrate. Harvested at stationary phase.	Iron regulation in Bp.	Ref 12
8	Human factors supplement	BpK96243	Saline	1XDPBS****	Overnight incubation	K91XDPBS16hrs	2	16hrs	150	37°C	Bacteria grown to log phase in 1XTSBDC and exposed to 1XPBS for 16hrs.	Saline condition.	-
			Insulin, 11U/ml	1XDPBS	Overnight incubation at human physiological concentration of insulin.	K9Insulin	2	16hrs	150	37°C	Bacteria grown to log phase in 1XTSBDC and exposed to PBS with 11U/ml human insulin for 16hrs.	Insulin regulation; implications on mammalian infection.	Modified from Ref 13
			Normal Human Serum (NHS), 30%	1XDPBS	Overnight incubation at 30% NHS.	K930NHS	2	16hrs	150	37°C	Bacteria grown to log phase in 1XTSBDC and exposed to PBS with 30% human serum for 16hrs.	Human serum resistance; implications on mammalian infection.	Ref 14
	STRESSES
	PHYSICAL STRESS
9	Temperature Stress	BpK96243	Cold stress	LB	Initial response to cold stress.	K904C30mins	2	30mins	Static	4°C	Bacteria grown to log phase, pelleted and resuspended in cold LB medium.	Bp survives and persists when stored at 4 degrees celsius in laboratory fridges.	Ref 19.
				LB	Overnight incubation under cold stress.	K904C16hrs	2	16hrs	Static	4°C	Bacteria grown to log phase, pelleted and resuspended in cold LB medium.	Bp survives and persists when stored at 4 degrees celsius in laboratory fridges.	Ref 19.
			Ambient temp	LB	Initial response to ambient temp.	K928C30mins	2	30mins	Static	28°C	Bacteria grown to log phase, pelleted and resuspended in rm temp LB medium.	Mimicking common soil temperature.	Ref 19.
				LB	Overnight incubation under ambient temp.	K928C16hrs	2	16hrs	Static	28°C	Bacteria grown to log phase, pelleted and resuspended in rm temp LB medium.	Mimicking common soil temperature.	Ref 19.
			Body temp	LB	Initial response to body temp.	K937C30mins	2	30mins	Static	37°C	Bacteria grown to log phase, pelleted and resuspended in warmed LB medium.	Mimicking mammalian host body temperature.	Ref 19.
				LB	Overnight incubation under body temp.	K937C16hrs	2	16hrs	Static	37°C	Bacteria grown to log phase, pelleted and resuspended in warmed LB medium.	Mimicking mammalian host body temperature.	Ref 19.
			Heat stress	LB	Initial response to heat stress.	K942C30mins	2	30mins	Static	42°C	Bacteria grown to log phase, pelleted and resuspended in heated LB medium.	Mimicking heated soil temperature in the tropics.	Ref 19.
				LB	Overnight incubation under heat stress.	K942C16hrs	2	16hrs	Static	42°C	Bacteria grown to log phase, pelleted and resuspended in heated LB medium.	Mimicking heated soil temperature in the tropics.	Ref 19.
10	Osmotic Stress	BpK96243	Normal osmolarity	LB	Normal growth medium osmolarity.	K9OsmRef	2	16hrs	Static	37°C	Bacteria grown to log phase, pelleted and resuspended in LB.	Common condition used for culturing bacteria in laboratory settings.	Refs 2, 3.
			High Salinity	LB	2M NaCl	K92MNaCl	2	16hrs	Static	37°C	Bacteria grown to log phase, pelleted and resuspended in LB with 2M NaCl	Bp is known to tolerate salt stress; modified from Refs 15 and 16 to very high levels of salt stress in vitro.	Modified from Refs 15, 16, 19.
			High Osmolarity	LB	2M Sorbitol	K92MSorbitol	2	16hrs	Static	37°C	Bacteria grown to log phase, pelleted and resuspended in LB with 2M Sorbitol	Bp possess sorbitol dehydrogenase; sorbitol is commonly used in the studies of osmotic stress (other than NaCl) in organisms like yeast.	Refs 17, 18, 19.
11	UV Irradiation	BpK96243	Normal fluorescent light	LB	Normal white fluorescent light, 10mins	K9UV10minsref	2	10mins	Static	37°C	Bacteria grown to log phase and exposed to fluorescent light for 10mins in BioSafety Cabinet.	Common condition used for culturing bacteria in laboratory settings.	Refs 2, 3.
				LB	Normal white fluorescent light, 1hr	K9UV1hrref	2	1hr	Static	37°C	Bacteria grown to log phase and exposed to fluorescent light for 1hr in BioSafety Cabinet.	Common condition used for culturing bacteria in laboratory settings.	Refs 2, 3.
			UV irradiation	LB	114 uW/cm2, for 10 mins	K9UV10mins	2	10mins	Static	37°C	Bacteria grown to log phase and exposed to UV for 10mins in BioSafety Cabinet.	Bp is known to be inactivated after exposure to UV radiation; modified from Ref 19 to study effects of UV on Bp without killing the culture.	Ref 19, 20.
				LB	114 uW/cm2, for 1hr	K9UV1hr	2	1hr	Static	37°C	Bacteria grown to log phase and exposed to UV for 1hr in BioSafety Cabinet.	Bp is known to be inactivated after exposure to UV radiation; modified from Ref 19 to study effects of UV on Bp without killing the culture.	Ref 19, 20.
12	Nutrient Deprivation	BpK96243	Normal growth medium	LB	Usual nutrients in normal LB medium	K9H2O1hrref	2	1hr	150	37°C	Bacteria grown to log phase in LB, pelleted and resuspended in fresh LB.	Common condition used for culturing bacteria in laboratory settings.	Refs 2, 3.
				LB	Usual nutrients in normal LB medium	K9H2O24hrref	2	24hrs	150	37°C	Bacteria grown to log phase in LB, pelleted and resuspended in fresh LB.	Common condition used for culturing bacteria in laboratory settings.	Refs 2, 3.
			Deionized water	Deionized water	Initial response to nutrient deprivation.	K9H2O1hr	2	1hr	150	37°C	Bacteria grown to log phase in LB, pelleted, washed with dH2O and resuspended in sterile deionized water.	Bp can survive in distilled water up to 17 years.	Refs 19,21, 28.
				Deionized water	Response to nutrient deprivation.	K9H2O24hr	2	24hrs	150	37°C	Bacteria grown to log phase in LB, pelleted, washed with dH2O and resuspended in sterile deionized water.	Bp can survive in distilled water up to 17 years.	Refs 19,21, 28.
	CHEMICAL STRESS
13	Antibiotics treatment	BpK96243	Normal growth medium without antibiotics	Mueller-Hinton Broth (MHB)	Usual MHB medium without antibiotics	K9MHB	4	16hrs	Static	37°C	Bacteria grown to log phase in MHB (5hr, 200rpm), pelleted and resuspended in fresh MHB.	Common condition used for culturing bacteria in laboratory settings, especially to study antibiotic susceptibilities of Bp.	Ref 22, 23.
			Bacteriocidal antibiotics	MHB	2ug/ml ceftazidime (1X MIC)	K9Ceft	2	16hrs	Static	37°C	Bacteria grown to log phase in MHB (5hr, 200rpm), pelleted and resuspended in MHB + antibiotics.	Bp response to sub-optimal ceftazidime (bacteriocidal antibiotics) treatment.	Ref 22, 23.
			Bacteriostatic antibiotics	MHB	8ug/ml chloramphenicol (1X MIC)	K9Chlamp	2	16hrs	Static	37°C	Bacteria grown to log phase in MHB (5hr, 200rpm), pelleted and resuspended in MHB + antibiotics.	Bp response to sub-optimal chloramphenicol (bacteriostatic antibiotics) treatment.	Ref 22, 23.
14	Acid and Alkali#	BpK96243	Neutral solution	1XDPBS	pH7.0	K9pH7	2	16hrs	Static	37°C	Bacteria grown to log phase, pelleted and resuspended in 1XPBS (pH 7.0)	Bp is known to thrive under neutral pH.	Ref 19.
			Acidic solution	1XDPBS	pH4.0 (HCl)	K9pH4	2	16hrs	Static	37°C	Bacteria grown to log phase, pelleted and resuspended in 1XPBS (pH 4.0)	Bp is known to survive under acidic conditions.	Ref 19, 29.
			Alkaline solution	1XDPBS	pH10.0 (NaOH)	-	-	16hrs	Static	37°C	Bacteria grown to log phase, pelleted and resuspended in 1XPBS (pH 10.0)
15	Oxidative Stress	BpK96243	Normal growth medium without Hydrogen peroxide	LB	Reference condition without oxidative stress	K9H2O2ref	1	20min	150	37°C	Bacteria grown in LB, reference condition for hydrogen peroxide perturbation.	Common condition used for culturing bacteria in laboratory settings.	Refs 2, 3.
			Hydrogen peroxide	LB	100mM Hydrogen peroxide	K9H2O210mins	1	20min	150	37°C	Bacteria grown in LB with hydrogen peroxide treatment for 10mins.	Oxidative stress on Bp.	Ref 15.
			Normal growth medium without Sodium hypochloride	LB	Reference condition without oxidative stress	K9ChemRef	2	16hrs	Static	37°C	Bacteria grown to log phase, pelleted, resuspended and continued incubation in fresh LB.	Common condition used for culturing bacteria in laboratory settings.	Refs 2, 3.
			Sodium hypochloride	LB	0.01% Bleach	K9Bleach	2	16hrs	Static	37°C	Bacteria grown to log phase, pelleted, resuspended and incubated in LB with 0.01% bleach (11% sodium hypochloride).	Effects of chlorine (environmental factor) on Bp.	Ref 19.
16	Heavy Metals	BpK96243	Chelated medium (low cations content)	1XTSBDC	Stationary phase	K91XTSBDC24hrs	2	24hrs	250	37°C	Bacteria subjected to growth in TSBDC. Harvested at stationary phase (24hr).	Reference condition used to culture Bp for study of effects of ions.	Ref 12
			200uM Cd2+	1XTSBDC	Stationary phase	K9Cd2+24hrs	2	24hrs	250	37°C	Bacteria subjected to growth in TSBDC with 200uM Cadmium (II) sulfate hydrate. Harvested at stationary phase.	Heavy metals are commonly encountered in soil environments that are polluted. Heavy metal resistance has also been implicated in two-component regulatory systems in Bp infection. Modified from Ref 23.	Ref 24.
			200uM Pb2+	1XTSBDC	Stationary phase	K9Pb2+24hrs	2	24hrs	250	37°C	Bacteria subjected to growth in TSBDC with 200uM Lead(II) carbonate. Harvested at stationary phase.	Heavy metals are commonly encountered in soil environments that are polluted. Heavy metal resistance has also been implicated in two-component regulatory systems in Bp infection. Modified from Ref 23.	Ref 24.
			200uM Ni2+	1XTSBDC	Stationary phase	K9Ni2+24hrs	2	24hrs	250	37°C	Bacteria subjected to growth in TSBDC with Nickel (II) sulfate hexahydrate. Harvested at stationary phase.	Heavy metals are commonly encountered in soil environments that are polluted. Heavy metal resistance has also been implicated in two-component regulatory systems in Bp infection. Modified from Ref 23.	Ref 24.
			200uM Al3+	1XTSBDC	Stationary phase	K9Al3+24hrs	2	24hrs	250	37°C	Bacteria subjected to growth in TSBDC with 200uM Aluminium (III) chloride hexahydrate. Harvested at stationary phase.	Heavy metals are commonly encountered in soil environments that are polluted. Heavy metal resistance has also been implicated in two-component regulatory systems in Bp infection. Modified from Ref 23.	Ref 24.
	INFECTION
17	In vitro	Bp22	Wild type	-	RAW 264.7 cell line (Mouse leukaemic monocyte macrophage), MOI 100:1	Bp22RAW	2	5hrs			Extracellular bacteria killed by 250ug/ml kanamycin 2 hrs p.i. Infected cells lysed for intracellular bacteria harvest after 5 hrs.	Bp wild type isolate in vitro cell line infection.	Refs 25, 26.
		Bp22 ΔbprC	T3SS3 mutant (BPSS1520)	-	RAW 264.7 cell line (Mouse leukaemic monocyte macrophage), MOI 100:1	Bp22BprCRAW	2	5hrs			Extracellular bacteria killed by 250ug/ml kanamycin 2 hrs p.i. Infected cells lysed for intracellular bacteria harvest after 5 hrs.	Bp T3SS3 mutant in vitro cell line infection.	Refs 25, 26.
		Bp22 ΔvirAG	T6SS5 mutant (BPSS1495, BPSS1494)	-	RAW 264.7 cell line (Mouse leukaemic monocyte macrophage), MOI 100:1	Bp22VirAGRAW	2	5hrs			Extracellular bacteria killed by 250ug/ml kanamycin 2 hrs p.i. Infected cells lysed for intracellular bacteria harvest after 5 hrs.	Bp T6SS5 mutant in vitro cell line infection.	Refs 25, 26.
18	In vivo	BpK96243	Infected BALB/c lungs (Acute Melioidosis)	-	Intranasal infection by log phase BpK96243, DOI 1000cfu	K9BALBcLungs	2^	3 days p.i.			BALBc mice infected with 1000CFU bacteria. Lungs harvested 3 days post-infection.	Murine in vivo infection.	-
	MUTANTS
19	Sigma factor	BpAL30 (RpoE) (BPSL2436)	Cold stress	LB	Initial response to cold stress.	AL3004C30mins	2	30mins	Static	4°C	Bacteria grown to log phase, pelleted and resuspended in cold LB medium.	RpoE mutant response to cold stress.	Follow-on experiments from Ref 15.
				LB	Overnight incubation under cold stress.	AL3004C16hrs	2	16hrs	Static	4°C	Bacteria grown to log phase, pelleted and resuspended in cold LB medium.	RpoE mutant response to cold stress.	Follow-on experiments from Ref 15.
			Body temp	LB	Initial response to body temp.	AL3037C30mins	2	30mins	Static	37°C	Bacteria grown to log phase, pelleted and resuspended in warmed LB medium.	RpoE mutant growth at host (mammalian) body temperature.	Follow-on experiments from Ref 15.
				LB	Overnight incubation under body temp.	AL3037C16hrs	2	16hrs	Static	37°C	Bacteria grown to log phase, pelleted and resuspended in warmed LB medium.	RpoE mutant growth at host (mammalian) body temperature.	Follow-on experiments from Ref 15.
			Normal growth medium without Hydrogen peroxide	LB	Reference condition without oxidative stress	AL30H2O2ref	1	20min	150	37°C	Bacteria grown in LB, reference condition for hydrogen peroxide perturbation.	RpoE mutant normal culture condition in laboratory.	Follow-on experiments from Ref 15.
			Hydrogen peroxide	LB	100mM Hydrogen peroxide	AL30H2O210mins	1	20min	150	37°C	Bacteria grown in LB with hydrogen peroxide treatment for 10mins.	RpoE mutant exposure to oxidative stress.	Follow-on experiments from Ref 15.
20	Quorum sensing	Bp008	Wild type	LB	Stationary phase	Bp008	2	24hrs	150	37°C	Bacteria grown for 24 hrs for maximal MprA expression.	Parental Bp isolate used for study of Bp quorum sensing system.	Ref 27
		Bp008::pmlI:Tc (BPSS0885)	Quorum sensing mutant	LB	Stationary phase	Bp008pmlITc	2	24hrs	150	37°C	Bacteria grown for 24 hrs for maximal MprA expression difference.	Bp quorum sensing mutant response.	Ref 27
21	T3SS3	Bp 22	Wild type	LB	Wild type	Bp22LB3hr	2	3hrs	150	37°C	Bacteria (wild type) grown to OD600=0.6 (log phase) in LB.	Common condition used for culturing bacteria in laboratory settings.	Refs 2, 3.
			Wild type	LB	Wild type	Bp22LB4hr	2	4hrs	150	37°C	Bacteria (wild type) grown to 4 hrs (log phase) in LB.	Common condition used for culturing bacteria in laboratory settings.	Refs 2, 3.
		Bp 22 ΔbprP	TTSS3 mutant (BPSS1553)	LB	TTSS3 mutant	Bp22BprP	2	3hrs	150	37°C	Bacteria (mutant) grown to OD600=0.6 (log phase) in LB.	Growth of T3SS3 mutant in culture under normal laboratory settings.	Refs 25, 26.
		Bp 22 ΔbsaN	TTSS3 mutant (BPSS1546)	LB	TTSS3 mutant	Bp22BsaN	2	3hrs	150	37°C	Bacteria (mutant) grown to OD600=0.6 (log phase) in LB.	Growth of T3SS3 mutant in culture under normal laboratory settings.	Refs 25, 26.
		Bp22 ΔbprC	TTSS3 mutant (BPSS1520)	LB	TTSS3 mutant	Bp22BprC	2	4hrs	150	37°C	Bacteria (mutant) grown to 4 hrs (log phase) in LB.	Growth of T3SS3 mutant in culture under normal laboratory settings.	Refs 25, 26.
	21 Major Conditions		82 Detailed Conditions
	#Alkali treatment resulted in total lysis of bacterial cells, thus condition was not profiled on the arrays.
	^very high background noise was observed for 1 of the replicates and was thus excluded from the analyses.
	*CDM - 0.03M NaCl, 0.032M MgSO4.7H2O, 0.03M KCl, 0.03M (NH4)2SO4, 0.012M K2PO4, 0.55M Glucose, 0.5M MOPS
	**Modified M63 - 64mM KH2PO4, 33mM NH4Cl, 1mM MgCl2, 0.2% (w/v) Glucose, adjusted to pH 7.0 with KOH.
	***1XTSBDC - 1X Trypticase Soy Broth-Dialyzed Chelated
	****1XDPBS - 1X Dulbecco's Phosphate Buffered Saline

## Sheet: (C) References for Conditions
(C) References
1	Subsin et.al. (2003). Role of the stationary growth phase sigma factor RpoS of Burkholderia pseudomallei in response to physiological stress conditions. J Bact 185(23):7008-14
2	Rodrigues et.al. (2006). Global Map of Growth-Regulated Gene Expression in Burkholderia pseudomallei, the Causative Agent of Melioidosis. J Bact 188(23): 8178 - 8188
3	Chieng et.al. (2012). Burkholderia pseudomallei transcriptional adaptation in macrophages. BMC Genomics 13:328
4	Percheron et.al. (1995). Burkholderia pseudomallei Requires Zn2+ for Optimal Exoprotease Production in Chemically Deﬁned Media. Appl Environ Microbiol 61(8):3151-3153
5	Nandi et.al. (2010). A Genomic Survey of Positive Selection in Burkholderia pseudomallei Provides Insights into the Evolution of Accidental Virulence. PLoS Pathog 6(4): e1000845
6	Cuccui et.al. (2007). Development of Signature-Tagged Mutagenesis in Burkholderia pseudomallei To Identify Genes Important in Survival and Pathogenesis. Infect. Immun. 75(3):1186-1195
7	Hamad et.al. (2011). Adaptation and antibiotic tolerance of anaerobic Burkholderia pseudomallei. Antimicrob Agents Chemother 55(7):3313-23
8	Smith et.al. (1995). Quantitative recovery of Burkholderia pseudomallei from soil in Thailand. Trans R Soc Trop Med Hyg 89(5):488-90
9	Limmathurotsakul et.al. (2010). Burkholderia pseudomallei Is Spatially Distributed in Soil in Northeast Thailand. PLoS Negl Trop Dis 4(6): e694
10	Larsen et.al. (2013). Survival, sublethal injury, and recovery of environmental Burkholderia pseudomallei in soil subjected to desiccation. Appl Environ Microbiol 79(7):2424-7
11	KEGG Pathway. http://www.genome.jp/kegg-bin/show_pathway?bpl00920
12	Tuanyok et.al. (2005). Genome-wide expression analysis of iron regulation in Burkholderia pseudomallei and Burkholderia mallei using DNA microarrays. FEMS Microbiology Letters 252:327-335
13	Woods et.al. (1993). Interaction of insulin with Pseudomonas pseudomallei. Infection and Immunity 61:4045-4050.
14	DeShazer et.al. (1998). The Tpe II O-antigenic polysaccharide moiety of Burkholderia pseudomallei lipopolysaccharide is required for serum resistance and virulence. Molecular Microbiology 30:1081-1100.
15	Korbsrisate et.al. (2005). The Burkholderia pseudomallei RpoE (AlgU) operon is involved in environmental stress tolerance and biofilm formation. FEMS Microbiol Lett. 252(2):243-9
16	Pumirat et.al. (2009). Altered secretome of Burkholderia pseudomallei induced by salt stress. Biochim Biophys Acta 1794(6):898-904
17	Shen et.al. (1999). Roles of Sugar Alcohols in Osmotic Stress Adaptation. Replacement of Glycerol by Mannitol and Sorbitol in Yeast. Plant Physiology 121:45-52
18	Wang et.al. (1999). Effect of sorbitol induced osmotic stress on the changes of carbohydrate and free amino acid pools in sweet potato cell suspension cultures. Bot Bull Acd Sin 40:219-225
19	Inglis et.al. (2006). Environmental Factors That Affect the Survival and Persistence of Burkholderia pseudomallei. Appl Environ Microbiol 72(11):6865-6875
20	Tong S, Yang S, Lu Z, He W (1996) Laboratory investigation of ecological factors influencing the environmental presence of Burkholderia pseudomallei. Microbiol Immunol 40: 451-453.
21	Pumpuang et.al. (2011). Survival of Burkholderia pseudomallei in distilled water for 16 years. Trans R Soc Trop Med Hyg 105(10):598-600
22	Inglis et.al. (2004). Comparison of the Susceptibilities of Burkholderia pseudomallei to Meropenem and Ceftazidime by Conventional and Intracellular Methods. Antimicrob Agents Chemother 48(8):2999-3005
23	Chantratita et.al. (2011). Antimicrobial resistance to ceftazidime involving loss of penicillin-binding protein 3 in Burkholderia pseudomallei PNAS 108(41):17165-17170
24	Jones et.al. (1997). Identification and characterization of a two-component regulatory system involved in invasion of eukaryotic cells and heavy-metal resistance in Burkholderia pseudomallei. Infect Immun 65(12):4972-7
25	Sun et.al. (2010). dentification of a regulatory cascade controlling Type III Secretion System 3 gene expression in Burkholderia pseudomallei. Mol Mic 76(3):677-689
26	Sun et.al. (2010). Unraveling type III secretion systems in the highly versatile Burkholderia pseudomallei. Trends in Microbiology 18(12):561-568
27	Valade et.al. (2004). The PmlI-PmlR quorum sensing in Burkholderia pseudomallei plays a key role in virulence and modulates production of the MprA protease. J Bact 186:2288-2294
28	Wuthiekanun V, Smith MD, White NJ (1995) Survival of Burkholderia pseudomallei in the absence of nutrients. Trans R Soc Trop Med Hyg 89: 491.
29	Dejsirilert S, Kondo E, Chiewsilp D, Kanai K (1991) Growth and survival of Pseudomonas pseudomallei in acidic environments. Jpn J Med Sci Biol 44: 63-74.
