# Supplementary material for: The Condition-Dependent Transcriptional Landscape of Burkholderia pseudomallei
Source: PLoS Genet. 2013 Sep 12;9(9):e1003795. doi: 10.1371/journal.pgen.1003795 (PMC3772027; doi:10.1371/journal.pgen.1003795)
Supplement: Table S4 — Details of genes without detectible expression. (XLS) [file pgen.1003795.s012.xls]

## Sheet: (A) Not Detectably Expressed
Table S4: Details of genes without detectible expression. (A) Compiled information from GenBank and other published works (^, *, #; scroll down for references). The state of gene expression is represented by 0 (not detectible) or 1 (detectible). Experimental descriptions for each condition (e.g. AL30H2O2ref) are available in Table S1.
SangerID	Start	End	Strand	GC Content	Amino Acid	Gene Name	Genomic Island	Product	COG	^Riley Classification	*Paralogs	*Positive Selection	*Core Gene	#Metagene	#Translocated Metagene	Detectible Expression in N number of conditions	AL30H2O2ref	AL30H2O210mins	AL3004C16hrs	AL3004C30mins	AL3037C16hrs	AL3037C30mins	Bp008	Bp008pmlITc	Bp22BprC	Bp22BprCRAW	Bp22BprP	Bp22bsaN	Bp22CDMES	Bp22CDMML	Bp22LB3hr	Bp22LB4hr	Bp22LBES	Bp22LBML	Bp22RAW	Bp22VirAGRAW	K9Aer1wk	K9Aer2wks	K9Al3+24hrs	K9Anaer1wk	K9Anaer2wks	K9BALBcLungs	K9Bleach	K9Ca2+ML	K9Cd2+24hrs	K9CDMES	K9CDMML	K9Ceft	K9ChemRef
BPSL0034	33781	34656	+	0.722	291	-	0	hypothetical_protein	General_function_prediction_only_genes:	Conserved_in_other_organisms	-	-	YES	metagene_conserved_in_Bp_Bm_Bc	YES	0	0	0	0	0	0	0	0	0	0	0	0	0	0	0	0	0	0	0	0	0	0	0	0	0	0	0	0	0	0	0	0	0	0
BPSL0035	34649	35170	+	0.766	173	-	0	hypothetical_protein	General_function_prediction_only_genes:	Inner_membrane	-	-	YES	-	-	0	0	0	0	0	0	0	0	0	0	0	0	0	0	0	0	0	0	0	0	0	0	0	0	0	0	0	0	0	0	0	0	0	0
BPSL0044	47789	48889	+	0.664	366	-	0	putative_outer_membrane_porin_protein	Cell_wall/membrane_biogenesis_genes:	Outer_membrane_constituents	-	-	YES	-	-	0	0	0	0	0	0	0	0	0	0	0	0	0	0	0	0	0	0	0	0	0	0	0	0	0	0	0	0	0	0	0	0	0	0
BPSL0046	50371	51102	-	0.712	243	-	0	ABC_transport_system_ATP-binding_protein	Amino_acid_transport_and_metabolism_genes:	Transport/binding_proteins	-	-	YES	-	-	0	0	0	0	0	0	0	0	0	0	0	0	0	0	0	0	0	0	0	0	0	0	0	0	0	0	0	0	0	0	0	0	0	0
BPSL0047	51475	52197	-	0.704	240	-	0	ABC_transport_system_ATP-binding_protein	Amino_acid_transport_and_metabolism_genes:	Transport/binding_proteins	-	-	YES	-	-	0	0	0	0	0	0	0	0	0	0	0	0	0	0	0	0	0	0	0	0	0	0	0	0	0	0	0	0	0	0	0	0	0	0
BPSL0049	53240	54118	-	0.727	292	-	0	putative_branched-chain_amino_acid_transport_system_permease_protein	Amino_acid_transport_and_metabolism_genes:	Amino_acids_and_amines	-	-	YES	-	-	0	0	0	0	0	0	0	0	0	0	0	0	0	0	0	0	0	0	0	0	0	0	0	0	0	0	0	0	0	0	0	0	0	0
BPSL0051	55599	57104	-	0.705	501	-	0	putative_phenylacetaldehyde_dehydrogenase	Energy_production_and_conversion_genes:	Amines	-	-	YES	-	-	0	0	0	0	0	0	0	0	0	0	0	0	0	0	0	0	0	0	0	0	0	0	0	0	0	0	0	0	0	0	0	0	0	0
BPSL0060	66187	67281	-	0.733	364	-	0	AraC_family_transcriptional_regulator	Transcription_genes:	AraC-family	-	-	YES	-	-	0	0	0	0	0	0	0	0	0	0	0	0	0	0	0	0	0	0	0	0	0	0	0	0	0	0	0	0	0	0	0	0	0	0
BPSL0095	107005	107316	+	0.609	103	-	0	hypothetical_protein	Not_in_COGs_genes:	Unknown_function,_no_known_homologs	-	-	YES	-	-	0	0	0	0	0	0	0	0	0	0	0	0	0	0	0	0	0	0	0	0	0	0	0	0	0	0	0	0	0	0	0	0	0	0
BPSL0120	135094	136284	-	0.746	396	-	0	SMF_family_protein	Intracellular_trafficking_and_secretion_genes:	Periplasmic/exported/lipoproteins	-	-	YES	metagene_conserved_in_Bp_Bm_Bc	-	0	0	0	0	0	0	0	0	0	0	0	0	0	0	0	0	0	0	0	0	0	0	0	0	0	0	0	0	0	0	0	0	0	0
BPSL0308	325765	327336	+	0.706	523	-	0	hypothetical_protein	Function_unknown_genes:	Periplasmic/exported/lipoproteins	-	-	YES	-	-	0	0	0	0	0	0	0	0	0	0	0	0	0	0	0	0	0	0	0	0	0	0	0	0	0	0	0	0	0	0	0	0	0	0
BPSL0309	327333	330545	+	0.692	1070	silA	0	putative_cation_efflux_system_protein	Inorganic_ion_transport_and_metabolism_genes:	Cations	-	-	YES	-	-	0	0	0	0	0	0	0	0	0	0	0	0	0	0	0	0	0	0	0	0	0	0	0	0	0	0	0	0	0	0	0	0	0	0
BPSL0330	353024	353512	-	0.683	162	-	0	AsnC_family_regulatory_protein	Transcription_genes:	AsnC-family	-	-	YES	-	-	0	0	0	0	0	0	0	0	0	0	0	0	0	0	0	0	0	0	0	0	0	0	0	0	0	0	0	0	0	0	0	0	0	0
BPSL0337	358939	359349	-	0.713	136	-	0	MutT/NUDIX_family_protein	Nucleotide_transport_and_metabolism_genes:	Not_classified_(included_putative_assignments)	-	-	YES	-	-	0	0	0	0	0	0	0	0	0	0	0	0	0	0	0	0	0	0	0	0	0	0	0	0	0	0	0	0	0	0	0	0	0	0
BPSL0344	364988	365581	-	0.618	197	-	0	hypothetical_protein	General_function_prediction_only_genes:	Periplasmic/exported/lipoproteins	-	-	-	-	-	0	0	0	0	0	0	0	0	0	0	0	0	0	0	0	0	0	0	0	0	0	0	0	0	0	0	0	0	0	0	0	0	0	0
BPSL0377	409296	409979	-	0.753	227	-	0	hypothetical_protein	Lipid_transport_and_metabolism_genes:	Unknown_function,_no_known_homologs	-	Positive_selection;-	-	-	-	0	0	0	0	0	0	0	0	0	0	0	0	0	0	0	0	0	0	0	0	0	0	0	0	0	0	0	0	0	0	0	0	0	0
BPSL0396	429943	430365	-	0.775	140	-	0	hypothetical_protein	Not_in_COGs_genes:	Periplasmic/exported/lipoproteins	-	-	YES	-	-	0	0	0	0	0	0	0	0	0	0	0	0	0	0	0	0	0	0	0	0	0	0	0	0	0	0	0	0	0	0	0	0	0	0
BPSL0415	448619	448993	-	0.737	-	-	0	Probable_gene_remnant._Similar_to_the_C-terminal_regions_of_Rhizobium_meliloti_probable_quinone_oxidoreductase_ra0019_or_sma0041_SWALL:Q931C5_(EMBL:AE007197)_(307_aa)_fasta_scores:_E():_4.4e-23,_53.22%_id_in_124_aa,_and_Pasteurella_multocida_hypothetical_protein_PM1940_SWALL:Q9CJQ4_(EMBL:AE006230)_(236_aa)_fasta_scores:_E():_3.3e-17,_47.54%_id_in_122_aa	Not_in_COGs_genes:	Not_classified_(included_putative_assignments)	-	-	YES	-	-	0	0	0	0	0	0	0	0	0	0	0	0	0	0	0	0	0	0	0	0	0	0	0	0	0	0	0	0	0	0	0	0	0	0
BPSL0416	449010	450893	-	0.737	627	-	0	family_T3_non-peptidase_homologue	Amino_acid_transport_and_metabolism_genes:	Not_classified_(included_putative_assignments)	-	-	YES	metagene_conserved_in_Bp_Bm_Bc	-	0	0	0	0	0	0	0	0	0	0	0	0	0	0	0	0	0	0	0	0	0	0	0	0	0	0	0	0	0	0	0	0	0	0
BPSL0550	607232	607906	+	0.596	224	-	GI_3	hypothetical_protein	Not_in_COGs_genes:	Unknown_function,_no_known_homologs	-	-	-	-	-	0	0	0	0	0	0	0	0	0	0	0	0	0	0	0	0	0	0	0	0	0	0	0	0	0	0	0	0	0	0	0	0	0	0
BPSL0551	608007	608579	+	0.595	190	-	GI_3	hypothetical_protein	Not_in_COGs_genes:	Unknown_function,_no_known_homologs	BPSL0551;BPSL0759	-	-	-	-	0	0	0	0	0	0	0	0	0	0	0	0	0	0	0	0	0	0	0	0	0	0	0	0	0	0	0	0	0	0	0	0	0	0
BPSL0560	614088	614699	-	0.595	203	-	GI_3	hypothetical_protein	Not_in_COGs_genes:	Unknown_function,_no_known_homologs	-	-	-	-	-	0	0	0	0	0	0	0	0	0	0	0	0	0	0	0	0	0	0	0	0	0	0	0	0	0	0	0	0	0	0	0	0	0	0
BPSL0603	679223	680491	-	0.674	422	-	0	putative_polysaccharide_biosynthesis_protein	General_function_prediction_only_genes:	Not_classified_(included_putative_assignments)	-	-	YES	metagene_conserved_in_Bp_Bm_Bc	YES	0	0	0	0	0	0	0	0	0	0	0	0	0	0	0	0	0	0	0	0	0	0	0	0	0	0	0	0	0	0	0	0	0	0
BPSL0676	770200	771372	+	0.708	390	-	0	putative_transmembrane_transporter_protein	Carbohydrate_transport_and_metabolism_genes:	Transport/binding_proteins	BPSL0676;BPSL2736	-	YES	-	-	0	0	0	0	0	0	0	0	0	0	0	0	0	0	0	0	0	0	0	0	0	0	0	0	0	0	0	0	0	0	0	0	0	0
BPSL0709	811759	812583	+	0.743	274	-	0	putative_LysR_family_transcriptional_regulator	Transcription_genes:	LysR-family	-	Positive_selection;Sanger_gene_slightly_longer	YES	-	-	0	0	0	0	0	0	0	0	0	0	0	0	0	0	0	0	0	0	0	0	0	0	0	0	0	0	0	0	0	0	0	0	0	0
BPSL0739	854145	854459	-	0.591	104	-	0	hypothetical_protein	Not_in_COGs_genes:	Unknown_function,_no_known_homologs	-	-	-	-	-	0	0	0	0	0	0	0	0	0	0	0	0	0	0	0	0	0	0	0	0	0	0	0	0	0	0	0	0	0	0	0	0	0	0
BPSL0836	971269	972465	+	0.746	398	-	0	family_S12_unassigned_peptidase	Defense_mechanisms_genes:	Not_classified_(included_putative_assignments)	-	-	YES	-	-	0	0	0	0	0	0	0	0	0	0	0	0	0	0	0	0	0	0	0	0	0	0	0	0	0	0	0	0	0	0	0	0	0	0
BPSL0837	972462	973673	+	0.761	403	-	0	putative_transporter_protein	Carbohydrate_transport_and_metabolism_genes:	Transport/binding_proteins	-	Positive_selection;-	YES	-	-	0	0	0	0	0	0	0	0	0	0	0	0	0	0	0	0	0	0	0	0	0	0	0	0	0	0	0	0	0	0	0	0	0	0
BPSL0890	1032616	1033968	-	0.758	450	-	0	putative_citrate_synthase	Energy_production_and_conversion_genes:	Not_classified_(included_putative_assignments)	-	-	-	-	-	0	0	0	0	0	0	0	0	0	0	0	0	0	0	0	0	0	0	0	0	0	0	0	0	0	0	0	0	0	0	0	0	0	0
BPSL0902	1053171	1053953	+	0.656	260	-	0	hypothetical_protein	Function_unknown_genes:	Inner_membrane	-	-	-	metagene_conserved_in_Bp_Bm_Bc	-	0	0	0	0	0	0	0	0	0	0	0	0	0	0	0	0	0	0	0	0	0	0	0	0	0	0	0	0	0	0	0	0	0	0
BPSL0917	1069929	1070639	-	0.74	236	-	0	putative_DNA_repair_protein	Replication,_recombination_and_repair_genes:	Conserved_in_other_organisms	-	-	-	metagene_conserved_in_Bp_Bm_Bc	-	0	0	0	0	0	0	0	0	0	0	0	0	0	0	0	0	0	0	0	0	0	0	0	0	0	0	0	0	0	0	0	0	0	0
BPSL0935	1087055	1087744	-	0.696	229	-	0	hypothetical_protein	Function_unknown_genes:	Not_classified_(included_putative_assignments)	-	-	-	metagene_conserved_in_Bp_Bm_Bc	YES	0	0	0	0	0	0	0	0	0	0	0	0	0	0	0	0	0	0	0	0	0	0	0	0	0	0	0	0	0	0	0	0	0	0
BPSL0943	1099585	1100412	-	0.611	275	-	0	putative_insertion_element_protein	Replication,_recombination_and_repair_genes:	Transposon-related_functions	-	-	-	-	-	0	0	0	0	0	0	0	0	0	0	0	0	0	0	0	0	0	0	0	0	0	0	0	0	0	0	0	0	0	0	0	0	0	0
BPSL0949	1109892	1110272	-	0.596	126	-	GI_5	hypothetical_protein	Replication,_recombination_and_repair_genes:	Unknown_function,_no_known_homologs	-	-	-	-	-	0	0	0	0	0	0	0	0	0	0	0	0	0	0	0	0	0	0	0	0	0	0	0	0	0	0	0	0	0	0	0	0	0	0
BPSL0983	1141238	1142170	-	0.725	310	btuF	0	putaive_vitamin_B12_transport_protein	Inorganic_ion_transport_and_metabolism_genes:	Other_Transport/binding_proteins	-	-	YES	metagene_conserved_in_Bp_Bm_Bc	-	0	0	0	0	0	0	0	0	0	0	0	0	0	0	0	0	0	0	0	0	0	0	0	0	0	0	0	0	0	0	0	0	0	0
BPSL1014	1182577	1182756	+	0.722	59	-	0	hypothetical_protein	Not_in_COGs_genes:	Unknown_function,_no_known_homologs	-	-	-	-	-	0	0	0	0	0	0	0	0	0	0	0	0	0	0	0	0	0	0	0	0	0	0	0	0	0	0	0	0	0	0	0	0	0	0
BPSL1023	1192563	1193040	+	0.699	-	-	0	Similar_to_parts_of_Caulobacter_crescentus_beta-D-glucosidase_cc0968_SWALL:Q9A9L2_(EMBL:AE005774)_(758_aa)_fasta_scores:_E():_2.3e-19,_42.42%_id_in_165_aa,_and_of_Agrobacterium_tumefaciens_beta-glucosidase_Cbg-1_SWALL:BGLS_AGRTU_(SWALL:P27034)_(818_aa)_fasta_scores:_E():_9.6e-12,_36.58%_id_in_164_aa	Not_in_COGs_genes:	Carbon_compounds	-	-	YES	-	-	0	0	0	0	0	0	0	0	0	0	0	0	0	0	0	0	0	0	0	0	0	0	0	0	0	0	0	0	0	0	0	0	0	0
BPSL1051	1220648	1220917	+	0.724	-	-	0	Possible_gene_remnant._Similar_to_N-terminal_region_of_Agrobacterium_tumefaciens_hypothetical_protein_atu1777_or_agr_c_3266_SWALL:Q8UEI0_(EMBL:AE009133)_(114_aa)_fasta_scores:_E():_2.8,_33.82%_id_in_68_aa	Not_in_COGs_genes:	Inner_membrane	-	-	-	-	-	0	0	0	0	0	0	0	0	0	0	0	0	0	0	0	0	0	0	0	0	0	0	0	0	0	0	0	0	0	0	0	0	0	0
BPSL1058	1226269	1226569	-	0.639	-	-	0	Gene_remnant._Similar_to_the_C-terminal_regions_of_Bradyrhizobium_japonicum_ID49_rsbeta5_SWALL:Q9ANP4_(EMBL:AF322012)_(275_aa)_fasta_scores:_E():_3.4e-22,_58%_id_in_100_aa,_and_to_Rhizobium_meliloti_putative_transposase_protein_r03101_or_smc03248_SWALL:Q92LG0_(EMBL:AL591792)_(276_aa)_fasta_scores:_E():_2.4e-20,_55.44%_id_in_101_aa	Not_in_COGs_genes:	Transposon-related_functions	-	-	-	-	-	0	0	0	0	0	0	0	0	0	0	0	0	0	0	0	0	0	0	0	0	0	0	0	0	0	0	0	0	0	0	0	0	0	0
BPSL1064	1229071	1229997	-	0.651	308	-	0	putative_dehydrogenase	General_function_prediction_only_genes:	Not_classified_(included_putative_assignments)	-	-	YES	-	-	0	0	0	0	0	0	0	0	0	0	0	0	0	0	0	0	0	0	0	0	0	0	0	0	0	0	0	0	0	0	0	0	0	0
BPSL1115	1293310	1294203	-	0.742	297	-	0	glutamyl-tRNA_synthetase	Translation_genes:	Amino_acyl_tRNA_synthesis;_tRNA_modification	-	-	YES	metagene_conserved_in_Bp_Bm_Bc	-	0	0	0	0	0	0	0	0	0	0	0	0	0	0	0	0	0	0	0	0	0	0	0	0	0	0	0	0	0	0	0	0	0	0
BPSL1129	1313442	1313894	-	0.64	150	-	0	hypothetical_protein	Function_unknown_genes:	Not_classified_(included_putative_assignments)	-	-	YES	-	-	0	0	0	0	0	0	0	0	0	0	0	0	0	0	0	0	0	0	0	0	0	0	0	0	0	0	0	0	0	0	0	0	0	0
BPSL1139	1325353	1325670	-	0.632	105	-	GI_6	hypothetical_protein	Not_in_COGs_genes:	Unknown_function,_no_known_homologs	-	-	-	-	-	0	0	0	0	0	0	0	0	0	0	0	0	0	0	0	0	0	0	0	0	0	0	0	0	0	0	0	0	0	0	0	0	0	0
BPSL1140	1325660	1326949	-	0.638	429	-	GI_6	putative_phage-related_protein	Function_unknown_genes:	Phage-related_functions_and_prophages	-	-	-	-	-	0	0	0	0	0	0	0	0	0	0	0	0	0	0	0	0	0	0	0	0	0	0	0	0	0	0	0	0	0	0	0	0	0	0
BPSL1141	1326949	1327128	-	0.611	59	-	GI_6	hypothetical_protein	Not_in_COGs_genes:	Unknown_function,_no_known_homologs	-	-	-	-	-	0	0	0	0	0	0	0	0	0	0	0	0	0	0	0	0	0	0	0	0	0	0	0	0	0	0	0	0	0	0	0	0	0	0
BPSL1142	1327141	1329036	-	0.637	631	-	GI_6	putative_phage-related_protein	General_function_prediction_only_genes:	Phage-related_functions_and_prophages	-	-	-	-	-	0	0	0	0	0	0	0	0	0	0	0	0	0	0	0	0	0	0	0	0	0	0	0	0	0	0	0	0	0	0	0	0	0	0
BPSL1143	1329087	1330607	-	0.627	506	-	GI_6	putative_phage_terminase	General_function_prediction_only_genes:	Phage-related_functions_and_prophages	-	-	-	-	-	0	0	0	0	0	0	0	0	0	0	0	0	0	0	0	0	0	0	0	0	0	0	0	0	0	0	0	0	0	0	0	0	0	0
BPSL1144	1330589	1331029	-	0.66	146	-	GI_6	hypothetical_protein	Not_in_COGs_genes:	Periplasmic/exported/lipoproteins	-	-	-	-	-	0	0	0	0	0	0	0	0	0	0	0	0	0	0	0	0	0	0	0	0	0	0	0	0	0	0	0	0	0	0	0	0	0	0
BPSL1146	1332197	1332745	-	0.583	182	-	GI_6	hypothetical_protein	Not_in_COGs_genes:	Unknown_function,_no_known_homologs	-	-	-	-	-	0	0	0	0	0	0	0	0	0	0	0	0	0	0	0	0	0	0	0	0	0	0	0	0	0	0	0	0	0	0	0	0	0	0
BPSL1147	1332745	1332972	-	0.645	75	-	GI_6	hypothetical_protein	Not_in_COGs_genes:	Unknown_function,_no_known_homologs	-	-	-	-	-	0	0	0	0	0	0	0	0	0	0	0	0	0	0	0	0	0	0	0	0	0	0	0	0	0	0	0	0	0	0	0	0	0	0
BPSL1148	1332969	1333262	-	0.585	97	-	GI_6	hypothetical_protein	Not_in_COGs_genes:	Unknown_function,_no_known_homologs	-	-	-	-	-	0	0	0	0	0	0	0	0	0	0	0	0	0	0	0	0	0	0	0	0	0	0	0	0	0	0	0	0	0	0	0	0	0	0
BPSL1150	1333469	1333720	-	0.536	83	-	GI_6	hypothetical_protein	Not_in_COGs_genes:	Unknown_function,_no_known_homologs	-	-	-	-	-	0	0	0	0	0	0	0	0	0	0	0	0	0	0	0	0	0	0	0	0	0	0	0	0	0	0	0	0	0	0	0	0	0	0
BPSL1151	1333713	1333895	-	0.552	60	-	GI_6	hypothetical_protein	Not_in_COGs_genes:	Unknown_function,_no_known_homologs	-	-	-	-	-	0	0	0	0	0	0	0	0	0	0	0	0	0	0	0	0	0	0	0	0	0	0	0	0	0	0	0	0	0	0	0	0	0	0
BPSL1154	1334758	1335144	-	0.587	128	-	GI_6	hypothetical_protein	Not_in_COGs_genes:	Unknown_function,_no_known_homologs	-	-	-	-	-	0	0	0	0	0	0	0	0	0	0	0	0	0	0	0	0	0	0	0	0	0	0	0	0	0	0	0	0	0	0	0	0	0	0
BPSL1155	1335125	1335355	-	0.654	76	-	GI_6	hypothetical_protein	Not_in_COGs_genes:	Conserved_in_other_organisms	-	-	-	-	-	0	0	0	0	0	0	0	0	0	0	0	0	0	0	0	0	0	0	0	0	0	0	0	0	0	0	0	0	0	0	0	0	0	0
BPSL1290a	1504266	1504625	-	0.697	119	-	0	hypothetical_protein	Not_in_COGs_genes:	Unknown_function,_no_known_homologs	-	-	-	-	-	0	0	0	0	0	0	0	0	0	0	0	0	0	0	0	0	0	0	0	0	0	0	0	0	0	0	0	0	0	0	0	0	0	0
BPSL1296	1509665	1510861	-	0.73	398	-	0	hypothetical_protein	General_function_prediction_only_genes:	Inner_membrane	-	-	YES	metagene_conserved_in_Bp_Bm_Bc	-	0	0	0	0	0	0	0	0	0	0	0	0	0	0	0	0	0	0	0	0	0	0	0	0	0	0	0	0	0	0	0	0	0	0
BPSL1297	1511140	1511928	+	0.71	262	-	0	hypothetical_protein	Function_unknown_genes:	Inner_membrane	-	-	-	-	-	0	0	0	0	0	0	0	0	0	0	0	0	0	0	0	0	0	0	0	0	0	0	0	0	0	0	0	0	0	0	0	0	0	0
BPSL1304A	1520978	1521415	-	0.719	145	-	0	hypothetical_protein	Not_in_COGs_genes:	Periplasmic/exported/lipoproteins	-	-	-	-	-	0	0	0	0	0	0	0	0	0	0	0	0	0	0	0	0	0	0	0	0	0	0	0	0	0	0	0	0	0	0	0	0	0	0
BPSL1312	1531255	1533156	+	0.696	633	glmS2	0	glucosamine--fructose-6-phosphate_aminotransferase_[isomerizing]_2	Cell_wall/membrane_biogenesis_genes:	Pool,_multipurpose_conversions_of_intermed._met'm	-	-	-	-	-	0	0	0	0	0	0	0	0	0	0	0	0	0	0	0	0	0	0	0	0	0	0	0	0	0	0	0	0	0	0	0	0	0	0
BPSL1326	1550869	1551717	-	0.724	282	-	0	putative_LysR-family_transcriptional_regulator	Transcription_genes:	LysR-family	-	-	YES	metagene_conserved_in_Bp_Bm_Bc	-	0	0	0	0	0	0	0	0	0	0	0	0	0	0	0	0	0	0	0	0	0	0	0	0	0	0	0	0	0	0	0	0	0	0
BPSL1347	1572506	1573639	-	0.698	377	-	0	hypothetical_protein	Not_in_COGs_genes:	Unknown_function,_no_known_homologs	-	Positive_selection;-	YES	-	-	0	0	0	0	0	0	0	0	0	0	0	0	0	0	0	0	0	0	0	0	0	0	0	0	0	0	0	0	0	0	0	0	0	0
BPSL1382	1611847	1612755	-	0.693	302	-	0	hypothetical_protein	Carbohydrate_transport_and_metabolism_genes:	Not_classified_(included_putative_assignments)	-	-	YES	metagene_conserved_in_Bp_Bm_Bc	-	0	0	0	0	0	0	0	0	0	0	0	0	0	0	0	0	0	0	0	0	0	0	0	0	0	0	0	0	0	0	0	0	0	0
BPSL1394	1620853	1621476	-	0.66	207	-	0	putative_exported_endonuclease	Lipid_transport_and_metabolism_genes:	Degradation_of_DNA	-	-	YES	metagene_conserved_in_Bp_Bm_Bc	-	0	0	0	0	0	0	0	0	0	0	0	0	0	0	0	0	0	0	0	0	0	0	0	0	0	0	0	0	0	0	0	0	0	0
BPSL1395	1621671	1622822	-	0.683	383	-	0	histone_deacetylase_family_protein	Secondary_metabolites_biosynthesis,_transport_and_catabolism_genes:	Not_classified_(included_putative_assignments)	-	-	YES	metagene_conserved_in_Bp_Bm_Bc	-	0	0	0	0	0	0	0	0	0	0	0	0	0	0	0	0	0	0	0	0	0	0	0	0	0	0	0	0	0	0	0	0	0	0
BPSL1396	1622837	1624030	-	0.735	397	-	0	hypothetical_protein	Not_in_COGs_genes:	Inner_membrane	-	-	YES	metagene_conserved_in_Bp_Bm_Bc	-	0	0	0	0	0	0	0	0	0	0	0	0	0	0	0	0	0	0	0	0	0	0	0	0	0	0	0	0	0	0	0	0	0	0
BPSL1397	1624054	1625121	-	0.701	355	-	0	putative_porin_signal_peptide_protein	Cell_wall/membrane_biogenesis_genes:	Outer_membrane_constituents	-	-	YES	metagene_conserved_in_Bp_Bm_Bc	-	0	0	0	0	0	0	0	0	0	0	0	0	0	0	0	0	0	0	0	0	0	0	0	0	0	0	0	0	0	0	0	0	0	0
BPSL1493	1731004	1732560	-	0.678	518	-	0	hypothetical_protein	General_function_prediction_only_genes:	Inner_membrane	-	-	YES	metagene_conserved_in_Bp_Bm_Bc	-	0	0	0	0	0	0	0	0	0	0	0	0	0	0	0	0	0	0	0	0	0	0	0	0	0	0	0	0	0	0	0	0	0	0
BPSL1494	1732557	1733057	-	0.707	166	-	0	putative_MerR-family_transcriptional_regulator	Transcription_genes:	MerR-family	-	-	YES	metagene_conserved_in_Bp_Bm_Bc	-	0	0	0	0	0	0	0	0	0	0	0	0	0	0	0	0	0	0	0	0	0	0	0	0	0	0	0	0	0	0	0	0	0	0
BPSL1597	1850065	1850436	+	0.715	123	-	0	hypothetical_protein	Not_in_COGs_genes:	Inner_membrane	-	-	-	-	-	0	0	0	0	0	0	0	0	0	0	0	0	0	0	0	0	0	0	0	0	0	0	0	0	0	0	0	0	0	0	0	0	0	0
BPSL1599	1853587	1855728	-	0.681	713	-	0	putative_membrane_linked_regulatory_protein	Energy_production_and_conversion_genes:	Others	-	-	YES	-	-	0	0	0	0	0	0	0	0	0	0	0	0	0	0	0	0	0	0	0	0	0	0	0	0	0	0	0	0	0	0	0	0	0	0
BPSL1601	1856294	1856698	-	0.726	134	-	0	hypothetical_protein	Not_in_COGs_genes:	Unknown_function,_no_known_homologs	-	-	-	-	-	0	0	0	0	0	0	0	0	0	0	0	0	0	0	0	0	0	0	0	0	0	0	0	0	0	0	0	0	0	0	0	0	0	0
BPSL1602	1856701	1856970	-	0.707	89	-	0	hypothetical_protein	Not_in_COGs_genes:	Unknown_function,_no_known_homologs	-	-	-	-	-	0	0	0	0	0	0	0	0	0	0	0	0	0	0	0	0	0	0	0	0	0	0	0	0	0	0	0	0	0	0	0	0	0	0
BPSL1603	1856981	1857511	-	0.704	176	-	0	putative_lipoprotein	Energy_production_and_conversion_genes:	Periplasmic/exported/lipoproteins	-	-	YES	-	-	0	0	0	0	0	0	0	0	0	0	0	0	0	0	0	0	0	0	0	0	0	0	0	0	0	0	0	0	0	0	0	0	0	0
BPSL1604	1857508	1858344	-	0.707	278	-	0	hypothetical_protein	General_function_prediction_only_genes:	Inner_membrane	-	-	YES	-	-	0	0	0	0	0	0	0	0	0	0	0	0	0	0	0	0	0	0	0	0	0	0	0	0	0	0	0	0	0	0	0	0	0	0
BPSL1605	1858341	1859255	-	0.716	304	-	0	putative_copper-related_ABC_transport_system,_ATP-binding_protein	Defense_mechanisms_genes:	Inner_membrane	-	-	YES	-	-	0	0	0	0	0	0	0	0	0	0	0	0	0	0	0	0	0	0	0	0	0	0	0	0	0	0	0	0	0	0	0	0	0	0
BPSL1606	1859252	1860502	-	0.688	416	-	0	putative_copper-binding_periplasmic_protein	Inorganic_ion_transport_and_metabolism_genes:	Periplasmic/exported/lipoproteins	-	-	YES	-	-	0	0	0	0	0	0	0	0	0	0	0	0	0	0	0	0	0	0	0	0	0	0	0	0	0	0	0	0	0	0	0	0	0	0
BPSL1610	1865413	1866153	+	0.711	246	-	0	putative_ABC_transport_system,_membrane_protein	Defense_mechanisms_genes:	Inner_membrane	-	-	YES	-	-	0	0	0	0	0	0	0	0	0	0	0	0	0	0	0	0	0	0	0	0	0	0	0	0	0	0	0	0	0	0	0	0	0	0
BPSL1624	1881764	1881955	-	0.656	63	-	0	hypothetical_protein	Not_in_COGs_genes:	Unknown_function,_no_known_homologs	-	-	-	-	-	0	0	0	0	0	0	0	0	0	0	0	0	0	0	0	0	0	0	0	0	0	0	0	0	0	0	0	0	0	0	0	0	0	0
BPSL1630	1889376	1889627	+	0.607	83	-	0	hypothetical_protein	Not_in_COGs_genes:	Unknown_function,_no_known_homologs	-	-	-	-	-	0	0	0	0	0	0	0	0	0	0	0	0	0	0	0	0	0	0	0	0	0	0	0	0	0	0	0	0	0	0	0	0	0	0
BPSL1632	1894492	1894977	+	0.591	161	-	0	hypothetical_protein	General_function_prediction_only_genes:	Inner_membrane	-	-	-	-	-	0	0	0	0	0	0	0	0	0	0	0	0	0	0	0	0	0	0	0	0	0	0	0	0	0	0	0	0	0	0	0	0	0	0
BPSL1653	1915444	1916208	+	0.63	254	-	GI_8	putative_GntR-family_regulatory_protein	Transcription_genes:	GntR-family	-	-	-	-	-	0	0	0	0	0	0	0	0	0	0	0	0	0	0	0	0	0	0	0	0	0	0	0	0	0	0	0	0	0	0	0	0	0	0
BPSL1654	1916230	1917690	+	0.606	486	gabD	GI_8	succinate-semialdehyde_dehydrogenase	Energy_production_and_conversion_genes:	Polyamine_biosynthesis	BPSL1654;BPSS0280	-	-	-	-	0	0	0	0	0	0	0	0	0	0	0	0	0	0	0	0	0	0	0	0	0	0	0	0	0	0	0	0	0	0	0	0	0	0
BPSL1655	1917834	1918952	+	0.596	372	-	GI_8	putative_outer_membrane_porin_protein	Cell_wall/membrane_biogenesis_genes:	Outer_membrane_constituents	-	-	-	-	-	0	0	0	0	0	0	0	0	0	0	0	0	0	0	0	0	0	0	0	0	0	0	0	0	0	0	0	0	0	0	0	0	0	0
BPSL1656	1919077	1919367	+	0.57	96	-	GI_8	hypothetical_protein	Not_in_COGs_genes:	Unknown_function,_no_known_homologs	-	-	-	-	-	0	0	0	0	0	0	0	0	0	0	0	0	0	0	0	0	0	0	0	0	0	0	0	0	0	0	0	0	0	0	0	0	0	0
BPSL1662	1934933	1935442	+	0.61	169	-	GI_8	hypothetical_protein	Not_in_COGs_genes:	Unknown_function,_no_known_homologs	-	-	-	-	-	0	0	0	0	0	0	0	0	0	0	0	0	0	0	0	0	0	0	0	0	0	0	0	0	0	0	0	0	0	0	0	0	0	0
BPSL1667	1944518	1946188	+	0.646	556	-	GI_8	hypothetical_protein	General_function_prediction_only_genes:	Unknown_function,_no_known_homologs	-	-	-	-	-	0	0	0	0	0	0	0	0	0	0	0	0	0	0	0	0	0	0	0	0	0	0	0	0	0	0	0	0	0	0	0	0	0	0
BPSL1668	1946220	1947071	+	0.61	283	-	GI_8	putative_adenylylsulfate_kinase	Inorganic_ion_transport_and_metabolism_genes:	Sulfur_metabolism	-	-	-	-	-	0	0	0	0	0	0	0	0	0	0	0	0	0	0	0	0	0	0	0	0	0	0	0	0	0	0	0	0	0	0	0	0	0	0
BPSL1668A	1947169	1947264	-	0.52	-	-	GI_8	Similar_to_internal_regions_of_Ralstonia_solanacearum_ISRso5-transposase_protein_TISRso5_SWALL:Q8Y371_(EMBL:AL646057)_(363_aa)_fasta_scores:_E():_4.4e-07,_79.41%_id_in_34_aa,_and_to_Agrobacterium_tumefaciens_transposase_Orf1_SWALL:Q44454_(EMBL:Z18270)_(366_aa)_fasta_scores:_E():_0.18,_54.54%_id_in_33_aa	Not_in_COGs_genes:	Transposon-related_functions	-	-	-	-	-	0	0	0	0	0	0	0	0	0	0	0	0	0	0	0	0	0	0	0	0	0	0	0	0	0	0	0	0	0	0	0	0	0	0
BPSL1669	1948084	1948797	+	0.52	237	-	GI_8	putative_two_component_system,_response_regulator	Signal_transduction_mechanisms_genes:	Sensor_kinase	-	-	-	-	-	0	0	0	0	0	0	0	0	0	0	0	0	0	0	0	0	0	0	0	0	0	0	0	0	0	0	0	0	0	0	0	0	0	0
BPSL1670	1949196	1949891	-	0.675	231	-	GI_8	putative_transposase	Replication,_recombination_and_repair_genes:	Transposon-related_functions	-	-	-	-	-	0	0	0	0	0	0	0	0	0	0	0	0	0	0	0	0	0	0	0	0	0	0	0	0	0	0	0	0	0	0	0	0	0	0
BPSL1674	1953075	1954175	-	0.647	366	-	GI_8	putative_outer_membrane_porin_protein_precursor	Cell_wall/membrane_biogenesis_genes:	Outer_membrane_constituents	-	-	-	-	-	0	0	0	0	0	0	0	0	0	0	0	0	0	0	0	0	0	0	0	0	0	0	0	0	0	0	0	0	0	0	0	0	0	0
BPSL1675	1954466	1954945	-	0.629	159	-	GI_8	putative_transposase	Replication,_recombination_and_repair_genes:	Surface_structures	-	-	-	-	-	0	0	0	0	0	0	0	0	0	0	0	0	0	0	0	0	0	0	0	0	0	0	0	0	0	0	0	0	0	0	0	0	0	0
BPSL1676	1955029	1956663	-	0.691	544	-	GI_8	putative_exported_histidine_ammonia-lyase	Amino_acid_transport_and_metabolism_genes:	Amino_acids	-	-	-	-	-	0	0	0	0	0	0	0	0	0	0	0	0	0	0	0	0	0	0	0	0	0	0	0	0	0	0	0	0	0	0	0	0	0	0
BPSL1677	1956681	1957964	-	0.696	427	-	GI_8	putative_transport-related,_integral_membrane_protein	General_function_prediction_only_genes:	Carbohydrates,_organic_acids_and_alcohols	-	-	-	-	-	0	0	0	0	0	0	0	0	0	0	0	0	0	0	0	0	0	0	0	0	0	0	0	0	0	0	0	0	0	0	0	0	0	0
BPSL1678	1958040	1959680	-	0.678	546	-	GI_8	urocanate_hydratase	Amino_acid_transport_and_metabolism_genes:	Amino_acids	-	-	-	-	-	0	0	0	0	0	0	0	0	0	0	0	0	0	0	0	0	0	0	0	0	0	0	0	0	0	0	0	0	0	0	0	0	0	0
BPSL1679	1959699	1960790	-	0.683	363	-	GI_8	hypothetical_protein	Function_unknown_genes:	Conserved_in_other_organisms	-	-	-	-	-	0	0	0	0	0	0	0	0	0	0	0	0	0	0	0	0	0	0	0	0	0	0	0	0	0	0	0	0	0	0	0	0	0	0
BPSL1680	1960971	1961861	-	0.659	296	-	GI_8	putative_LysR-family_transcriptional_regulatory_protein	Transcription_genes:	LysR-family	-	-	-	-	-	0	0	0	0	0	0	0	0	0	0	0	0	0	0	0	0	0	0	0	0	0	0	0	0	0	0	0	0	0	0	0	0	0	0
BPSL1681	1961961	1963346	+	0.693	461	-	GI_8	putative_allantoinase	Nucleotide_transport_and_metabolism_genes:	Carbon_compounds	-	-	-	-	-	0	0	0	0	0	0	0	0	0	0	0	0	0	0	0	0	0	0	0	0	0	0	0	0	0	0	0	0	0	0	0	0	0	0
BPSL1682	1963343	1964623	+	0.692	426	-	GI_8	N-carbamoyl-L-amino_acid_amidohydrolase	Amino_acid_transport_and_metabolism_genes:	Carbon_compounds	-	-	-	-	-	0	0	0	0	0	0	0	0	0	0	0	0	0	0	0	0	0	0	0	0	0	0	0	0	0	0	0	0	0	0	0	0	0	0
BPSL1688	1967586	1968296	-	0.675	236	-	GI_8	hypothetical_protein	General_function_prediction_only_genes:	Inner_membrane	-	-	-	-	-	0	0	0	0	0	0	0	0	0	0	0	0	0	0	0	0	0	0	0	0	0	0	0	0	0	0	0	0	0	0	0	0	0	0
BPSL1689	1968293	1968796	-	0.669	167	-	GI_8	hypothetical_protein	Function_unknown_genes:	Inner_membrane	-	-	-	-	-	0	0	0	0	0	0	0	0	0	0	0	0	0	0	0	0	0	0	0	0	0	0	0	0	0	0	0	0	0	0	0	0	0	0
BPSL1690	1968802	1969581	-	0.667	259	-	GI_8	hypothetical_protein	Not_in_COGs_genes:	Conserved_in_other_organisms	-	-	-	-	-	0	0	0	0	0	0	0	0	0	0	0	0	0	0	0	0	0	0	0	0	0	0	0	0	0	0	0	0	0	0	0	0	0	0
BPSL1693	1971401	1971775	+	0.617	-	-	GI_8	Gene_remnant,_similar_to_internal_regions_of_Ralstonia_solanacearum_ISRso14-transposase_OrfB_protein_SWALL:Q8XF72_(EMBL:AL646083)_(275_aa)_fasta_scores:_E():_1.1e-14,_44.64%_id_in_112_aa,_and_Pseudomonas_aeruginosa_hypothetical_protein_PA0987_SWALL:Q9I4Y2_(EMBL:AE004531)_(280_aa)_fasta_scores:_E():_3.2e-15,_45.37%_id_in_119_aa	Not_in_COGs_genes:	Transposon-related_functions	-	-	-	-	-	0	0	0	0	0	0	0	0	0	0	0	0	0	0	0	0	0	0	0	0	0	0	0	0	0	0	0	0	0	0	0	0	0	0
BPSL1697	1976205	1976967	-	0.629	-	-	GI_8	Similar_to_parts_of_Ralstonia_solanacearum_putative_integrase/recombinase_protein_rsp0902_or_rs01673_SWALL:Q8XRF2_(EMBL:AL646081)_(566_aa)_fasta_scores:_E():_4.4e-54,_58.68%_id_in_259_aa._Note:_Contains_frameshifts_at_residues_46_and_116_and_lack_an_appropriate_start_codon	Not_in_COGs_genes:	Phage-related_functions_and_prophages	-	-	-	-	-	0	0	0	0	0	0	0	0	0	0	0	0	0	0	0	0	0	0	0	0	0	0	0	0	0	0	0	0	0	0	0	0	0	0
BPSL1699	1977067	1977360	-	0.629	97	-	GI_8	hypothetical_protein	Not_in_COGs_genes:	Unknown_function,_no_known_homologs	-	-	-	-	-	0	0	0	0	0	0	0	0	0	0	0	0	0	0	0	0	0	0	0	0	0	0	0	0	0	0	0	0	0	0	0	0	0	0
BPSL1700	1977606	1978376	+	0.556	-	-	GI_8	Similar_to_the_N-terminal_regions_of_Ralstonia_solanacearum_putative_lipoprotein_rsp0564_or_rs03914_SWALL:Q8XSB4_(EMBL:AL646079)_(347_aa)_fasta_scores:_E():_2e-44,_65.04%_id_in_226_aa,_and_Ralstonia_solanacearum_hypothetical_protein_rsc2288_or_rs01268_SWALL:Q8XX30_(EMBL:AL646069)_(353_aa)_fasta_scores:_E():_4.4e-43,_62.44%_id_in_221_aa._Note:_Contains_an_in-frame_stop_codon_and_various_rframeshit…	Not_in_COGs_genes:	Conserved_in_other_organisms	-	-	-	-	-	0	0	0	0	0	0	0	0	0	0	0	0	0	0	0	0	0	0	0	0	0	0	0	0	0	0	0	0	0	0	0	0	0	0
BPSL1702	1978747	1979340	-	0.556	197	-	GI_8	putative_invertase	Replication,_recombination_and_repair_genes:	Phage-related_functions_and_prophages	-	-	-	-	-	0	0	0	0	0	0	0	0	0	0	0	0	0	0	0	0	0	0	0	0	0	0	0	0	0	0	0	0	0	0	0	0	0	0
BPSL1703	1979632	1980066	-	0.585	-	-	GI_8	Gene_remnant,_similar_to_internal_regions_of_Escherichia_coli_transposase_InsD_for_insertion_element_IS2_SWALL:INSD_ECOLI_(SWALL:P19777)_(301_aa)_fasta_scores:_E():_2e-18,_51.93%_id_in_129_aa,_and_Ralstonia_solanacearum_ISRso10-transposase_OrfB_protein_rsc1830_or_rs04263_SWALL:Q8XYC8_(EMBL:AL646066)_(282_aa)_fasta_scores:_E():_8e-32,_67.66%_id_in_133_aa	Not_in_COGs_genes:	Transposon-related_functions	-	-	-	-	-	0	0	0	0	0	0	0	0	0	0	0	0	0	0	0	0	0	0	0	0	0	0	0	0	0	0	0	0	0	0	0	0	0	0
BPSL1704a	1981770	1982252	+	0.563	160	-	GI_8	hypothetical_protein	Not_in_COGs_genes:	Unknown_function,_no_known_homologs	-	-	-	-	-	0	0	0	0	0	0	0	0	0	0	0	0	0	0	0	0	0	0	0	0	0	0	0	0	0	0	0	0	0	0	0	0	0	0
BPSL1705	1982643	1987463	+	0.634	1606	-	GI_8	hypothetical_protein	Intracellular_trafficking_and_secretion_genes:	Surface_structures	BPSL1705;BPSS0796	-	-	-	-	0	0	0	0	0	0	0	0	0	0	0	0	0	0	0	0	0	0	0	0	0	0	0	0	0	0	0	0	0	0	0	0	0	0
BPSL1706	1989162	1989479	+	0.572	105	-	GI_8	putative_HNS-like_protein	General_function_prediction_only_genes:	Chromosome_replication	-	-	-	-	-	0	0	0	0	0	0	0	0	0	0	0	0	0	0	0	0	0	0	0	0	0	0	0	0	0	0	0	0	0	0	0	0	0	0
BPSL1728	2036054	2037277	-	0.688	407	-	0	putative_exported_porin	Cell_wall/membrane_biogenesis_genes:	Outer_membrane_constituents	-	-	YES	metagene_conserved_in_Bp_Bm_Bc	YES	0	0	0	0	0	0	0	0	0	0	0	0	0	0	0	0	0	0	0	0	0	0	0	0	0	0	0	0	0	0	0	0	0	0
BPSL1729	2037625	2038425	+	0.719	266	-	0	putative_AraC-family_transcriptional_regulator	Transcription_genes:	AraC-family	-	-	YES	metagene_conserved_in_Bp_Bm_Bc	YES	0	0	0	0	0	0	0	0	0	0	0	0	0	0	0	0	0	0	0	0	0	0	0	0	0	0	0	0	0	0	0	0	0	0
BPSL1730	2038590	2039528	+	0.75	312	-	0	putative_transmembrane_protein	General_function_prediction_only_genes:	Outer_membrane_constituents	-	-	YES	metagene_conserved_in_Bp_Bm_Bc	YES	0	0	0	0	0	0	0	0	0	0	0	0	0	0	0	0	0	0	0	0	0	0	0	0	0	0	0	0	0	0	0	0	0	0
BPSL1751	2063491	2064606	+	0.7	371	-	0	putative_amino-acid_transport-related_exported_protein	Amino_acid_transport_and_metabolism_genes:	Periplasmic/exported/lipoproteins	-	-	YES	-	-	0	0	0	0	0	0	0	0	0	0	0	0	0	0	0	0	0	0	0	0	0	0	0	0	0	0	0	0	0	0	0	0	0	0
BPSL1789	2125986	2126732	-	0.735	248	-	0	short_chain_dehydrogenase	General_function_prediction_only_genes:	Not_classified_(included_putative_assignments)	-	-	-	metagene_conserved_in_Bp_Bm_Bc	YES	0	0	0	0	0	0	0	0	0	0	0	0	0	0	0	0	0	0	0	0	0	0	0	0	0	0	0	0	0	0	0	0	0	0
BPSL1790	2128282	2129373	-	0.691	363	-	0	putative_zinc-binding_dehydrogenase	General_function_prediction_only_genes:	Not_classified_(included_putative_assignments)	-	-	YES	-	-	0	0	0	0	0	0	0	0	0	0	0	0	0	0	0	0	0	0	0	0	0	0	0	0	0	0	0	0	0	0	0	0	0	0
BPSL1791	2129576	2130595	-	0.719	339	-	0	hypothetical_protein	Carbohydrate_transport_and_metabolism_genes:	Inner_membrane	-	-	YES	metagene_conserved_in_Bp_Bm_Bc	YES	0	0	0	0	0	0	0	0	0	0	0	0	0	0	0	0	0	0	0	0	0	0	0	0	0	0	0	0	0	0	0	0	0	0
BPSL1792	2130598	2132127	-	0.7	509	-	0	hypothetical_protein	Not_in_COGs_genes:	Unknown_function,_no_known_homologs	-	-	YES	metagene_conserved_in_Bp_Bm_Bc	YES	0	0	0	0	0	0	0	0	0	0	0	0	0	0	0	0	0	0	0	0	0	0	0	0	0	0	0	0	0	0	0	0	0	0
BPSL1793	2132189	2133133	-	0.684	314	-	0	putative_sugar-binding_exported_protein	Carbohydrate_transport_and_metabolism_genes:	Periplasmic/exported/lipoproteins	-	-	YES	metagene_conserved_in_Bp_Bm_Bc	YES	0	0	0	0	0	0	0	0	0	0	0	0	0	0	0	0	0	0	0	0	0	0	0	0	0	0	0	0	0	0	0	0	0	0
BPSL1849	2202667	2203113	-	0.664	148	-	0	hypothetical_protein	Secondary_metabolites_biosynthesis,_transport_and_catabolism_genes:	Not_classified_(included_putative_assignments)	-	-	YES	metagene_conserved_in_Bp_Bm_Bc	-	0	0	0	0	0	0	0	0	0	0	0	0	0	0	0	0	0	0	0	0	0	0	0	0	0	0	0	0	0	0	0	0	0	0
BPSL1949	2321235	2322026	+	0.721	-	-	0	Partial_CDS._Similar_to_the_N-terminal_region_of_Pseudomonas_aeruginosa_hypothetical_protein_pa2566_SWALL:Q9I0R9_(EMBL:AE004684)_(395_aa)_fasta_scores:_E():_2.4e-60,_59.09%_id_in_264_aa,_and_of_Pyrobaculum_aerophilum_flavoprotein_reductase,_conjectural_pae2618_SWALL:Q8ZUT5_(EMBL:AE009886)_(380_aa)_fasta_scores:_E():_6.5e-19,_30.11%_id_in_259_aa._Note:_CDS_lacks_a_stop_codon	Not_in_COGs_genes:	Conserved_in_other_organisms	-	-	-	-	-	0	0	0	0	0	0	0	0	0	0	0	0	0	0	0	0	0	0	0	0	0	0	0	0	0	0	0	0	0	0	0	0	0	0
BPSL1951	2323136	2323693	+	0.733	185	-	0	hypothetical_protein	General_function_prediction_only_genes:	Periplasmic/exported/lipoproteins	-	-	YES	metagene_conserved_in_Bp_Bm_Bc	-	0	0	0	0	0	0	0	0	0	0	0	0	0	0	0	0	0	0	0	0	0	0	0	0	0	0	0	0	0	0	0	0	0	0
BPSL1952	2323708	2324808	+	0.717	366	-	0	putative_polysaccharide_deacetylase	Carbohydrate_transport_and_metabolism_genes:	Not_classified_(included_putative_assignments)	-	Positive_selection;-	YES	metagene_conserved_in_Bp_Bm_Bc	-	0	0	0	0	0	0	0	0	0	0	0	0	0	0	0	0	0	0	0	0	0	0	0	0	0	0	0	0	0	0	0	0	0	0
BPSL1953	2324852	2325574	+	0.748	240	-	0	short_chain_dehydrogenase	General_function_prediction_only_genes:	Not_classified_(included_putative_assignments)	-	-	YES	-	-	0	0	0	0	0	0	0	0	0	0	0	0	0	0	0	0	0	0	0	0	0	0	0	0	0	0	0	0	0	0	0	0	0	0
BPSL1973	2348990	2351191	+	0.71	733	-	0	putative_antibiotic_resistance_protein	Function_unknown_genes:	Detoxification	-	-	YES	metagene_conserved_in_Bp_Bm_Bc	-	0	0	0	0	0	0	0	0	0	0	0	0	0	0	0	0	0	0	0	0	0	0	0	0	0	0	0	0	0	0	0	0	0	0
BPSL2007	2392284	2393978	-	0.736	564	-	0	hypothetical_protein	General_function_prediction_only_genes:	Inner_membrane	-	Positive_selection;-	YES	-	-	0	0	0	0	0	0	0	0	0	0	0	0	0	0	0	0	0	0	0	0	0	0	0	0	0	0	0	0	0	0	0	0	0	0
BPSL2037	2432687	2432866	+	0.639	59	-	0	hypothetical_protein	Not_in_COGs_genes:	Unknown_function,_no_known_homologs	-	-	-	-	-	0	0	0	0	0	0	0	0	0	0	0	0	0	0	0	0	0	0	0	0	0	0	0	0	0	0	0	0	0	0	0	0	0	0
BPSL2054	2458817	2459293	-	0.713	158	-	0	hypothetical_protein	Not_in_COGs_genes:	Unknown_function,_no_known_homologs	-	-	-	-	-	0	0	0	0	0	0	0	0	0	0	0	0	0	0	0	0	0	0	0	0	0	0	0	0	0	0	0	0	0	0	0	0	0	0
BPSL2056	2460880	2463447	+	0.689	855	-	0	putative_oxidase	Not_in_COGs_genes:	Not_classified_(included_putative_assignments)	-	-	YES	-	-	0	0	0	0	0	0	0	0	0	0	0	0	0	0	0	0	0	0	0	0	0	0	0	0	0	0	0	0	0	0	0	0	0	0
BPSL2057	2463474	2463962	+	0.759	162	-	0	hypothetical_protein	Not_in_COGs_genes:	Periplasmic/exported/lipoproteins	-	-	-	-	-	0	0	0	0	0	0	0	0	0	0	0	0	0	0	0	0	0	0	0	0	0	0	0	0	0	0	0	0	0	0	0	0	0	0
BPSL2058	2463997	2464557	+	0.688	186	-	0	hypothetical_protein	General_function_prediction_only_genes:	Not_classified_(included_putative_assignments)	-	-	YES	-	-	0	0	0	0	0	0	0	0	0	0	0	0	0	0	0	0	0	0	0	0	0	0	0	0	0	0	0	0	0	0	0	0	0	0
BPSL2059	2464603	2464836	+	0.714	77	-	0	hypothetical_protein	Not_in_COGs_genes:	Periplasmic/exported/lipoproteins	-	-	YES	-	-	0	0	0	0	0	0	0	0	0	0	0	0	0	0	0	0	0	0	0	0	0	0	0	0	0	0	0	0	0	0	0	0	0	0
BPSL2060	2465295	2465639	-	0.638	114	-	0	hypothetical_protein	General_function_prediction_only_genes:	Not_classified_(included_putative_assignments)	-	-	YES	-	-	0	0	0	0	0	0	0	0	0	0	0	0	0	0	0	0	0	0	0	0	0	0	0	0	0	0	0	0	0	0	0	0	0	0
BPSL2061	2465656	2467185	-	0.698	509	-	0	hypothetical_protein	General_function_prediction_only_genes:	Not_classified_(included_putative_assignments)	-	-	YES	-	-	0	0	0	0	0	0	0	0	0	0	0	0	0	0	0	0	0	0	0	0	0	0	0	0	0	0	0	0	0	0	0	0	0	0
BPSL2062	2467187	2467897	-	0.702	236	-	0	OmpA_family_protein	Cell_wall/membrane_biogenesis_genes:	Not_classified_(included_putative_assignments)	-	-	YES	-	-	0	0	0	0	0	0	0	0	0	0	0	0	0	0	0	0	0	0	0	0	0	0	0	0	0	0	0	0	0	0	0	0	0	0
BPSL2063	2467978	2471250	-	0.696	1090	-	0	hypothetical_protein	Intracellular_trafficking_and_secretion_genes:	Inner_membrane	-	-	YES	-	-	0	0	0	0	0	0	0	0	0	0	0	0	0	0	0	0	0	0	0	0	0	0	0	0	0	0	0	0	0	0	0	0	0	0
BPSL2064	2471336	2471470	-	0.489	44	-	0	hypothetical_protein	Not_in_COGs_genes:	Unknown_function,_no_known_homologs	-	-	-	-	-	0	0	0	0	0	0	0	0	0	0	0	0	0	0	0	0	0	0	0	0	0	0	0	0	0	0	0	0	0	0	0	0	0	0
BPSL2065	2471650	2472360	-	0.646	236	-	0	putative_two_component_system,_response_regulator	Signal_transduction_mechanisms_genes:	Sensor_kinase	-	-	YES	-	-	0	0	0	0	0	0	0	0	0	0	0	0	0	0	0	0	0	0	0	0	0	0	0	0	0	0	0	0	0	0	0	0	0	0
BPSL2071	2478691	2478885	-	0.59	64	-	0	hypothetical_protein	Not_in_COGs_genes:	Inner_membrane	-	-	-	-	-	0	0	0	0	0	0	0	0	0	0	0	0	0	0	0	0	0	0	0	0	0	0	0	0	0	0	0	0	0	0	0	0	0	0
BPSL2119	2545542	2546516	-	0.731	324	-	0	putative_amino_acid_racemase	Amino_acid_transport_and_metabolism_genes:	Pool,_multipurpose_conversions_of_intermed._met'm	-	-	YES	-	-	0	0	0	0	0	0	0	0	0	0	0	0	0	0	0	0	0	0	0	0	0	0	0	0	0	0	0	0	0	0	0	0	0	0
BPSL2126	2552858	2554078	+	0.713	406	-	0	putative_transport-related,_membrane_protein	General_function_prediction_only_genes:	Other_Transport/binding_proteins	-	-	YES	-	-	0	0	0	0	0	0	0	0	0	0	0	0	0	0	0	0	0	0	0	0	0	0	0	0	0	0	0	0	0	0	0	0	0	0
BPSL2131	2560595	2561521	+	0.712	-	-	0	Pseudogene._Similar_to_Rhizobium_loti_hypothetical_protein_mll1909_SWALL:Q98JK0_(EMBL:AP002998)_(406_aa)_fasta_scores:_E():_1.8e-56,_54.7%_id_in_404_aa,_and_to_Rhizobium_meliloti_hypothetical_protein_r00749_or_smc00804_SWALL:Q92KM5_(EMBL:AL591784)_(407_aa)_fasta_scores:_E():_3e-55,_52.82%_id_in_407_aa._CDS_contains_a_frameshift_mutation_(Amber)_after_codon_211._In_comparison_to_orthologues_the_CD…	Not_in_COGs_genes:	Conserved_in_other_organisms	-	-	-	-	-	0	0	0	0	0	0	0	0	0	0	0	0	0	0	0	0	0	0	0	0	0	0	0	0	0	0	0	0	0	0	0	0	0	0
BPSL2207	2649224	2651545	-	0.682	773	-	0	putative_molybdopterin_oxidoreductase	Energy_production_and_conversion_genes:	Molybdopterin	-	-	YES	-	-	0	0	0	0	0	0	0	0	0	0	0	0	0	0	0	0	0	0	0	0	0	0	0	0	0	0	0	0	0	0	0	0	0	0
BPSL2208	2652050	2652823	-	0.636	257	fpr	0	ferredoxin--NADP_reductase	Energy_production_and_conversion_genes:	Electron_transport	BPSL2208;BPSL0241	-	YES	-	-	0	0	0	0	0	0	0	0	0	0	0	0	0	0	0	0	0	0	0	0	0	0	0	0	0	0	0	0	0	0	0	0	0	0
BPSL2209	2652831	2653820	-	0.712	329	-	0	molybdenum_cofactor_biosynthesis_protein_A	Coenzyme_transport_and_metabolism_genes:	Menaquinone,_ubiquinone	-	-	-	-	-	0	0	0	0	0	0	0	0	0	0	0	0	0	0	0	0	0	0	0	0	0	0	0	0	0	0	0	0	0	0	0	0	0	0
BPSL2210	2653904	2654242	-	0.646	112	fdxA	0	ferredoxin_I	Energy_production_and_conversion_genes:	Electron_transport	BPSL2210;BPSL2463	-	YES	-	-	0	0	0	0	0	0	0	0	0	0	0	0	0	0	0	0	0	0	0	0	0	0	0	0	0	0	0	0	0	0	0	0	0	0
BPSL2306	2780897	2782117	-	0.707	406	-	0	DNA_polymerase_IV	Replication,_recombination_and_repair_genes:	DNA_-_replication,_repair,_restriction/modification	-	Positive_selection;-	YES	metagene_conserved_in_Bp_Bm_Bc	-	0	0	0	0	0	0	0	0	0	0	0	0	0	0	0	0	0	0	0	0	0	0	0	0	0	0	0	0	0	0	0	0	0	0
BPSL2327	2812366	2813709	-	0.712	447	-	0	putative_transporter_protein	General_function_prediction_only_genes:	Transport/binding_proteins	BPSL2327;BPSS1252	-	YES	-	-	0	0	0	0	0	0	0	0	0	0	0	0	0	0	0	0	0	0	0	0	0	0	0	0	0	0	0	0	0	0	0	0	0	0
BPSL2328	2813906	2815288	-	0.706	460	-	0	CAIB/BAIF_family_protein	Energy_production_and_conversion_genes:	Not_classified_(included_putative_assignments)	-	-	YES	-	-	0	0	0	0	0	0	0	0	0	0	0	0	0	0	0	0	0	0	0	0	0	0	0	0	0	0	0	0	0	0	0	0	0	0
BPSL2329	2815456	2817249	-	0.704	597	-	0	putative_acyl-CoA_dehydrogenase	Lipid_transport_and_metabolism_genes:	Not_classified_(included_putative_assignments)	-	-	YES	metagene_conserved_in_Bp_Bm_Bc	-	0	0	0	0	0	0	0	0	0	0	0	0	0	0	0	0	0	0	0	0	0	0	0	0	0	0	0	0	0	0	0	0	0	0
BPSL2384	2879658	2880101	+	0.73	-	-	0	Probable_gene_remnant._Similar_to_the_C-terminal_regions_of_Escherichia_coli,_and_Escherichia_coli_O157:H7_glutathione_S-transferase_Gst_SWALL:GT_ECOLI_(SWALL:P39100)_(201_aa)_fasta_scores:_E():_1.5e-14,_37.5%_id_in_152_aa,_and_Ralstonia_solanacearum_probable_glutathione_S-transferase_protein_rsc3309_or_rs02538_SWALL:Q8XU84_(EMBL:AL646074)_(202_aa)_fasta_scores:_E():_2.4e-27,_55.55%_id_in_144_aa	Not_in_COGs_genes:	Thioredoxin,_glutaredoxin,_glutathione	-	-	YES	-	-	0	0	0	0	0	0	0	0	0	0	0	0	0	0	0	0	0	0	0	0	0	0	0	0	0	0	0	0	0	0	0	0	0	0
BPSL2404	2905792	2906940	+	0.675	382	-	0	periplasmic_ligand_binding_lipoprotein	Amino_acid_transport_and_metabolism_genes:	Periplasmic/exported/lipoproteins	-	-	YES	-	-	0	0	0	0	0	0	0	0	0	0	0	0	0	0	0	0	0	0	0	0	0	0	0	0	0	0	0	0	0	0	0	0	0	0
BPSL2405	2907039	2908211	+	0.713	390	-	0	putative_FAD_dependent_oxidoreductase	Amino_acid_transport_and_metabolism_genes:	Not_classified_(included_putative_assignments)	-	-	YES	metagene_conserved_in_Bp_Bm_Bc	YES	0	0	0	0	0	0	0	0	0	0	0	0	0	0	0	0	0	0	0	0	0	0	0	0	0	0	0	0	0	0	0	0	0	0
BPSL2474A	2985594	2985962	+	0.705	122	-	0	hypothetical_protein	Not_in_COGs_genes:	Periplasmic/exported/lipoproteins	-	-	YES	-	-	0	0	0	0	0	0	0	0	0	0	0	0	0	0	0	0	0	0	0	0	0	0	0	0	0	0	0	0	0	0	0	0	0	0
BPSL2474B	2985959	2987236	+	0.711	425	-	0	hypothetical_protein	Not_in_COGs_genes:	Inner_membrane	-	-	-	-	-	0	0	0	0	0	0	0	0	0	0	0	0	0	0	0	0	0	0	0	0	0	0	0	0	0	0	0	0	0	0	0	0	0	0
BPSL2475	2987882	2989342	+	0.695	486	-	0	sigma-54_dependant_regulatory_protein	Signal_transduction_mechanisms_genes:	Others	-	-	YES	-	-	0	0	0	0	0	0	0	0	0	0	0	0	0	0	0	0	0	0	0	0	0	0	0	0	0	0	0	0	0	0	0	0	0	0
BPSL2533	3053003	3054313	+	0.726	436	-	0	hypothetical_protein	General_function_prediction_only_genes:	Not_classified_(included_putative_assignments)	-	Positive_selection;Sanger_gene_shorter	YES	metagene_conserved_in_Bp_Bm_Bc	-	0	0	0	0	0	0	0	0	0	0	0	0	0	0	0	0	0	0	0	0	0	0	0	0	0	0	0	0	0	0	0	0	0	0
BPSL2588	3108136	3108714	-	0.687	192	-	0	hypothetical_protein	Not_in_COGs_genes:	Unknown_function,_no_known_homologs	-	-	-	-	-	0	0	0	0	0	0	0	0	0	0	0	0	0	0	0	0	0	0	0	0	0	0	0	0	0	0	0	0	0	0	0	0	0	0
BPSL2652	3175261	3176883	+	0.711	540	-	0	putative_branched-chain_amino_acid_transport_system,_permease_component	Amino_acid_transport_and_metabolism_genes:	Amino_acids_and_amines	-	-	YES	metagene_conserved_in_Bp_Bm_Bc	-	0	0	0	0	0	0	0	0	0	0	0	0	0	0	0	0	0	0	0	0	0	0	0	0	0	0	0	0	0	0	0	0	0	0
BPSL2653	3176885	3178087	+	0.682	400	-	0	putative_branched-chain_amino_acid_transport_system,_permease_component	Amino_acid_transport_and_metabolism_genes:	Amino_acids_and_amines	-	-	YES	metagene_conserved_in_Bp_Bm_Bc	-	0	0	0	0	0	0	0	0	0	0	0	0	0	0	0	0	0	0	0	0	0	0	0	0	0	0	0	0	0	0	0	0	0	0
BPSL2654	3178084	3178947	+	0.682	287	-	0	putative_ABC_transport_ATP-binding_subunit	General_function_prediction_only_genes:	Amino_acids_and_amines	-	-	YES	metagene_conserved_in_Bp_Bm_Bc	-	0	0	0	0	0	0	0	0	0	0	0	0	0	0	0	0	0	0	0	0	0	0	0	0	0	0	0	0	0	0	0	0	0	0
BPSL2655	3178952	3179644	+	0.69	230	-	0	putative_ABC_transport_ATP-binding_subunit	Amino_acid_transport_and_metabolism_genes:	Amino_acids_and_amines	-	-	YES	metagene_conserved_in_Bp_Bm_Bc	-	0	0	0	0	0	0	0	0	0	0	0	0	0	0	0	0	0	0	0	0	0	0	0	0	0	0	0	0	0	0	0	0	0	0
BPSL2661	3184073	3184753	+	0.723	226	ureF	0	urease_accessory_protein	Posttranslational_modification,_protein_turnover,_chaperones_genes:	Detoxification	-	-	YES	metagene_conserved_in_Bp_Bm_Bc	-	0	0	0	0	0	0	0	0	0	0	0	0	0	0	0	0	0	0	0	0	0	0	0	0	0	0	0	0	0	0	0	0	0	0
BPSL2770	3307838	3308833	-	0.66	331	kpsF	0	putative_capsule_expression_protein	General_function_prediction_only_genes:	Surface_polysaccharides_&_antigens	-	Positive_selection;Sanger_gene_slightly_longer	YES	-	-	0	0	0	0	0	0	0	0	0	0	0	0	0	0	0	0	0	0	0	0	0	0	0	0	0	0	0	0	0	0	0	0	0	0
BPSL2771	3308877	3309428	-	0.699	183	kdsC	0	putative_haloacid_dehalogenase-like_hydrolase_protein	General_function_prediction_only_genes:	Not_classified_(included_putative_assignments)	-	-	YES	-	-	0	0	0	0	0	0	0	0	0	0	0	0	0	0	0	0	0	0	0	0	0	0	0	0	0	0	0	0	0	0	0	0	0	0
BPSL2773	3310355	3311515	-	0.681	386	cpsI	0	putative_glycosyltransferase_protein	Cell_wall/membrane_biogenesis_genes:	Surface_polysaccharides_&_antigens	-	Positive_selection;Sanger_gene_slightly_longer	YES	-	-	0	0	0	0	0	0	0	0	0	0	0	0	0	0	0	0	0	0	0	0	0	0	0	0	0	0	0	0	0	0	0	0	0	0
BPSL2774	3311512	3312456	-	0.66	314	wdpH	0	hypothetical_protein	Cell_wall/membrane_biogenesis_genes:	Surface_polysaccharides_&_antigens	-	-	YES	-	-	0	0	0	0	0	0	0	0	0	0	0	0	0	0	0	0	0	0	0	0	0	0	0	0	0	0	0	0	0	0	0	0	0	0
BPSL2775	3312453	3312989	-	0.669	178	cysE	0	putative_colanic_acid_biosynthesis_acetyltransferase	Amino_acid_transport_and_metabolism_genes:	Surface_polysaccharides_&_antigens	-	-	YES	-	-	0	0	0	0	0	0	0	0	0	0	0	0	0	0	0	0	0	0	0	0	0	0	0	0	0	0	0	0	0	0	0	0	0	0
BPSL2776	3312991	3314187	-	0.658	398	kpsS	0	hypothetical_protein	Cell_wall/membrane_biogenesis_genes:	Inner_membrane	-	-	YES	-	-	0	0	0	0	0	0	0	0	0	0	0	0	0	0	0	0	0	0	0	0	0	0	0	0	0	0	0	0	0	0	0	0	0	0
BPSL2777	3314220	3315494	-	0.689	424	wbpF	0	putative_O-antigen_translocase	General_function_prediction_only_genes:	Surface_polysaccharides_&_antigens	-	-	YES	-	-	0	0	0	0	0	0	0	0	0	0	0	0	0	0	0	0	0	0	0	0	0	0	0	0	0	0	0	0	0	0	0	0	0	0
BPSL2778	3315555	3317795	-	0.668	746	epsB	0	putative_tyrosine-protein_kinase_involved_in_EPS_biosynthesis	Cell_wall/membrane_biogenesis_genes:	Surface_polysaccharides_&_antigens	-	-	YES	-	-	0	0	0	0	0	0	0	0	0	0	0	0	0	0	0	0	0	0	0	0	0	0	0	0	0	0	0	0	0	0	0	0	0	0
BPSL2779	3317837	3318271	-	0.699	144	wzb	0	putative_protein-tyrosine-phosphatase_(low_molecular_weight)	Signal_transduction_mechanisms_genes:	Surface_polysaccharides_&_antigens	-	-	YES	-	-	0	0	0	0	0	0	0	0	0	0	0	0	0	0	0	0	0	0	0	0	0	0	0	0	0	0	0	0	0	0	0	0	0	0
BPSL2784	3323439	3324797	+	0.673	452	-	0	hypothetical_protein	Not_in_COGs_genes:	Inner_membrane	-	-	YES	-	-	0	0	0	0	0	0	0	0	0	0	0	0	0	0	0	0	0	0	0	0	0	0	0	0	0	0	0	0	0	0	0	0	0	0
BPSL2848	3410457	3411272	-	0.697	271	phnE	0	putative_phosphonate_transport_protein_PhnE	Inorganic_ion_transport_and_metabolism_genes:	Carbohydrates,_organic_acids_and_alcohols	-	-	YES	-	-	0	0	0	0	0	0	0	0	0	0	0	0	0	0	0	0	0	0	0	0	0	0	0	0	0	0	0	0	0	0	0	0	0	0
BPSL2951	3521744	3522943	+	0.714	399	-	0	hypothetical_protein	General_function_prediction_only_genes:	Inner_membrane	-	-	YES	metagene_conserved_in_Bp_Bm_Bc	-	0	0	0	0	0	0	0	0	0	0	0	0	0	0	0	0	0	0	0	0	0	0	0	0	0	0	0	0	0	0	0	0	0	0
BPSL3009	3586238	3587455	+	0.724	405	pilC	0	type_IV_pilus_assembly_protein_PilC	Intracellular_trafficking_and_secretion_genes:	Outer_membrane_constituents	-	-	YES	metagene_conserved_in_Bp_Bm_Bc	-	0	0	0	0	0	0	0	0	0	0	0	0	0	0	0	0	0	0	0	0	0	0	0	0	0	0	0	0	0	0	0	0	0	0
BPSL3064	3654507	3655250	+	0.719	247	-	0	hypothetical_protein	Transcription_genes:	Unknown_function,_no_known_homologs	-	-	YES	-	-	0	0	0	0	0	0	0	0	0	0	0	0	0	0	0	0	0	0	0	0	0	0	0	0	0	0	0	0	0	0	0	0	0	0
BPSL3170	3774618	3775946	-	0.7	442	-	0	putative_secretion_system_protein	Intracellular_trafficking_and_secretion_genes:	Not_classified_(included_putative_assignments)	-	-	YES	metagene_conserved_in_Bp_Bm_Bc	-	0	0	0	0	0	0	0	0	0	0	0	0	0	0	0	0	0	0	0	0	0	0	0	0	0	0	0	0	0	0	0	0	0	0
BPSL3173	3777966	3778913	-	0.757	315	-	0	hypothetical_protein	Not_in_COGs_genes:	Conserved_in_other_organisms	-	-	YES	-	-	0	0	0	0	0	0	0	0	0	0	0	0	0	0	0	0	0	0	0	0	0	0	0	0	0	0	0	0	0	0	0	0	0	0
BPSL3251	3863545	3864726	+	0.758	393	-	0	putative_inner_membrane_transport_protein	General_function_prediction_only_genes:	Carbohydrates,_organic_acids_and_alcohols	-	-	YES	-	-	0	0	0	0	0	0	0	0	0	0	0	0	0	0	0	0	0	0	0	0	0	0	0	0	0	0	0	0	0	0	0	0	0	0
BPSL3254A	3867516	3867743	+	0.618	75	-	0	hypothetical_protein	Not_in_COGs_genes:	Inner_membrane	-	-	-	-	-	0	0	0	0	0	0	0	0	0	0	0	0	0	0	0	0	0	0	0	0	0	0	0	0	0	0	0	0	0	0	0	0	0	0
BPSL3262	3877520	3878950	-	0.59	476	-	GI_11	putative_plasmid_conjugal_transfer_protein	Intracellular_trafficking_and_secretion_genes:	Plasmid-related_functions	-	-	-	-	-	0	0	0	0	0	0	0	0	0	0	0	0	0	0	0	0	0	0	0	0	0	0	0	0	0	0	0	0	0	0	0	0	0	0
BPSL3265	3882108	3882494	-	0.597	128	-	GI_11	putative_plasmid_conjugal_transfer_protein	Not_in_COGs_genes:	Plasmid-related_functions	-	-	-	-	-	0	0	0	0	0	0	0	0	0	0	0	0	0	0	0	0	0	0	0	0	0	0	0	0	0	0	0	0	0	0	0	0	0	0
BPSL3266	3882778	3883023	-	0.541	81	-	GI_11	hypothetical_protein	Not_in_COGs_genes:	Plasmid-related_functions	-	-	-	-	-	0	0	0	0	0	0	0	0	0	0	0	0	0	0	0	0	0	0	0	0	0	0	0	0	0	0	0	0	0	0	0	0	0	0
BPSL3285	3901018	3902118	-	0.725	366	-	0	putative_oxidoreductase	General_function_prediction_only_genes:	Other_Degradation_of_small_molecules	-	-	YES	metagene_conserved_in_Bp_Bm_Bc	-	0	0	0	0	0	0	0	0	0	0	0	0	0	0	0	0	0	0	0	0	0	0	0	0	0	0	0	0	0	0	0	0	0	0
BPSL3348	3971034	3971939	-	0.583	301	-	GI_12	putative_bacteriophage_protein	General_function_prediction_only_genes:	Phage-related_functions_and_prophages	-	-	-	-	-	0	0	0	0	0	0	0	0	0	0	0	0	0	0	0	0	0	0	0	0	0	0	0	0	0	0	0	0	0	0	0	0	0	0
BPSL3381	4012432	4013185	-	0.679	-	-	0	Probable_gene_remnant._Similar_to_the_C-terminal_regions_of_Rhizobium_meliloti_putative_oxidoreductase_protein_rb0708_or_smb21129_SWALL:Q92VJ3_(EMBL:AL603644)_(442_aa)_fasta_scores:_E():_2e-29,_41.43%_id_in_251_aa,_and_Bradyrhizobium_japonicum_oxidoreductase_blr7970_SWALL:Q89C28_(EMBL:AP005964)_(470_aa)_fasta_scores:_E():_1.8e-21,_36.39%_id_in_261_aa._CDS_contains_frameshift_mutations_after_codon…	Not_in_COGs_genes:	Not_classified_(included_putative_assignments)	-	-	YES	-	-	0	0	0	0	0	0	0	0	0	0	0	0	0	0	0	0	0	0	0	0	0	0	0	0	0	0	0	0	0	0	0	0	0	0
BPSL3384	4014229	4015419	-	0.696	396	-	0	putative_aminotransferase	Amino_acid_transport_and_metabolism_genes:	Not_classified_(included_putative_assignments)	-	-	YES	-	-	0	0	0	0	0	0	0	0	0	0	0	0	0	0	0	0	0	0	0	0	0	0	0	0	0	0	0	0	0	0	0	0	0	0
BPSS0010	8455	9471	-	0.671	338	-	0	hypothetical_protein	General_function_prediction_only_genes:	Unknown_function,_no_known_homologs	-	-	YES	-	-	0	0	0	0	0	0	0	0	0	0	0	0	0	0	0	0	0	0	0	0	0	0	0	0	0	0	0	0	0	0	0	0	0	0
BPSS0060	64719	64991	+	0.59	90	-	0	hypothetical_protein	Cell_motility_genes:	Unknown_function,_no_known_homologs	-	-	-	-	-	0	0	0	0	0	0	0	0	0	0	0	0	0	0	0	0	0	0	0	0	0	0	0	0	0	0	0	0	0	0	0	0	0	0
BPSS0068	78867	79601	+	0.595	244	-	0	hypothetical_protein	Not_in_COGs_genes:	Unknown_function,_no_known_homologs	-	-	-	-	-	0	0	0	0	0	0	0	0	0	0	0	0	0	0	0	0	0	0	0	0	0	0	0	0	0	0	0	0	0	0	0	0	0	0
BPSS0085	98817	99440	-	0.668	207	-	0	hypothetical_protein	Not_in_COGs_genes:	Inner_membrane	-	Positive_selection;Sanger_gene_longer	YES	-	-	0	0	0	0	0	0	0	0	0	0	0	0	0	0	0	0	0	0	0	0	0	0	0	0	0	0	0	0	0	0	0	0	0	0
BPSS0086	99533	101128	-	0.631	531	-	0	cytochrome_C_oxidase-related_protein	Energy_production_and_conversion_genes:	Aerobic_respiration	BPSS0086;BPSL0454	-	YES	-	-	0	0	0	0	0	0	0	0	0	0	0	0	0	0	0	0	0	0	0	0	0	0	0	0	0	0	0	0	0	0	0	0	0	0
BPSS0094	114379	114951	+	0.623	190	-	0	fimbria_subunit_protein	Intracellular_trafficking_and_secretion_genes:	Surface_structures	-	-	YES	-	-	0	0	0	0	0	0	0	0	0	0	0	0	0	0	0	0	0	0	0	0	0	0	0	0	0	0	0	0	0	0	0	0	0	0
BPSS0095	115016	115672	+	0.598	218	-	0	hypothetical_protein	Function_unknown_genes:	Other_Transport/binding_proteins	-	Positive_selection;Sanger_gene_slightly_shorter	YES	-	-	0	0	0	0	0	0	0	0	0	0	0	0	0	0	0	0	0	0	0	0	0	0	0	0	0	0	0	0	0	0	0	0	0	0
BPSS0100	120671	121153	+	0.613	160	-	0	hypothetical_protein	Function_unknown_genes:	Other_Transport/binding_proteins	-	-	YES	-	-	0	0	0	0	0	0	0	0	0	0	0	0	0	0	0	0	0	0	0	0	0	0	0	0	0	0	0	0	0	0	0	0	0	0
BPSS0102	122505	123806	+	0.66	433	-	0	hypothetical_protein	Function_unknown_genes:	Other_Transport/binding_proteins	-	-	YES	-	-	0	0	0	0	0	0	0	0	0	0	0	0	0	0	0	0	0	0	0	0	0	0	0	0	0	0	0	0	0	0	0	0	0	0
BPSS0104	127919	128488	+	0.668	189	-	0	hypothetical_protein	Not_in_COGs_genes:	Unknown_function,_no_known_homologs	-	-	YES	-	-	0	0	0	0	0	0	0	0	0	0	0	0	0	0	0	0	0	0	0	0	0	0	0	0	0	0	0	0	0	0	0	0	0	0
BPSS0109	136345	137373	-	0.583	342	-	0	hypothetical_protein	Intracellular_trafficking_and_secretion_genes:	Periplasmic/exported/lipoproteins	-	-	YES	-	-	0	0	0	0	0	0	0	0	0	0	0	0	0	0	0	0	0	0	0	0	0	0	0	0	0	0	0	0	0	0	0	0	0	0
BPSS0110	137428	138498	-	0.67	356	-	0	hypothetical_protein	Function_unknown_genes:	Other_Transport/binding_proteins	-	-	YES	-	-	0	0	0	0	0	0	0	0	0	0	0	0	0	0	0	0	0	0	0	0	0	0	0	0	0	0	0	0	0	0	0	0	0	0
BPSS0115	142788	143843	-	0.644	351	-	0	hypothetical_protein	Not_in_COGs_genes:	Unknown_function,_no_known_homologs	-	-	YES	-	-	0	0	0	0	0	0	0	0	0	0	0	0	0	0	0	0	0	0	0	0	0	0	0	0	0	0	0	0	0	0	0	0	0	0
BPSS0119	151956	152618	-	0.508	220	-	0	two-component_system_response_regulator	Signal_transduction_mechanisms_genes:	Sensor_kinase	-	-	-	-	-	0	0	0	0	0	0	0	0	0	0	0	0	0	0	0	0	0	0	0	0	0	0	0	0	0	0	0	0	0	0	0	0	0	0
BPSS0121	155912	156622	-	0.547	236	-	0	fimbrial_chaperone	Intracellular_trafficking_and_secretion_genes:	Chaperones	-	-	-	-	-	0	0	0	0	0	0	0	0	0	0	0	0	0	0	0	0	0	0	0	0	0	0	0	0	0	0	0	0	0	0	0	0	0	0
BPSS0122	157098	157745	-	0.474	215	-	0	hypothetical_protein	Intracellular_trafficking_and_secretion_genes:	Periplasmic/exported/lipoproteins	-	-	-	-	-	0	0	0	0	0	0	0	0	0	0	0	0	0	0	0	0	0	0	0	0	0	0	0	0	0	0	0	0	0	0	0	0	0	0
BPSS0129	165876	167096	+	0.713	406	-	0	transcriptional_regulator	Signal_transduction_mechanisms_genes:	Others	-	-	YES	-	-	0	0	0	0	0	0	0	0	0	0	0	0	0	0	0	0	0	0	0	0	0	0	0	0	0	0	0	0	0	0	0	0	0	0
BPSS0134	173732	174673	-	0.721	313	-	0	LysR-family_transcriptional_regulator	Transcription_genes:	LysR-family	-	-	YES	-	-	0	0	0	0	0	0	0	0	0	0	0	0	0	0	0	0	0	0	0	0	0	0	0	0	0	0	0	0	0	0	0	0	0	0
BPSS0155	202436	203368	-	0.706	310	-	0	LysR-family_transcriptional_regulator	Transcription_genes:	LysR-family	-	-	YES	-	-	0	0	0	0	0	0	0	0	0	0	0	0	0	0	0	0	0	0	0	0	0	0	0	0	0	0	0	0	0	0	0	0	0	0
BPSS0162	213569	215074	+	0.669	501	-	0	siderophore_biosynthesis-related_protein	Secondary_metabolites_biosynthesis,_transport_and_catabolism_genes:	Fe_storage	-	-	YES	-	-	0	0	0	0	0	0	0	0	0	0	0	0	0	0	0	0	0	0	0	0	0	0	0	0	0	0	0	0	0	0	0	0	0	0
BPSS0188	252651	253427	+	0.655	258	-	0	dehydrogenase	General_function_prediction_only_genes:	Not_classified_(included_putative_assignments)	-	-	YES	-	-	0	0	0	0	0	0	0	0	0	0	0	0	0	0	0	0	0	0	0	0	0	0	0	0	0	0	0	0	0	0	0	0	0	0
BPSS0189	253453	253893	+	0.726	-	-	0	Gene_remnant._Similar_to_the_C-terminal_region_of_Streptomyces_coelicolor_putative_AraC-family_transcriptional_regulator_sco0605_or_scf55.29_SWALL:Q9RJN9_(EMBL:AL939106)_(311_aa)_fasta_scores:_E():_3e-22,_54.86%_id_in_144_aa,_and_of_Mycobacterium_smegmatis_putative_transcription_activator_SWALL:Q938B5_(EMBL:AY054120)_(332_aa)_fasta_scores:_E():_1.2e-19,_47.26%_id_in_146_aa._CDS_lacks_an_appropria…	Not_in_COGs_genes:	AraC-family	-	-	-	-	-	0	0	0	0	0	0	0	0	0	0	0	0	0	0	0	0	0	0	0	0	0	0	0	0	0	0	0	0	0	0	0	0	0	0
BPSS0193	258412	259767	-	0.667	451	-	0	hypothetical_protein	General_function_prediction_only_genes:	Inner_membrane	-	-	YES	-	-	0	0	0	0	0	0	0	0	0	0	0	0	0	0	0	0	0	0	0	0	0	0	0	0	0	0	0	0	0	0	0	0	0	0
BPSS0194	259954	260958	-	0.722	334	-	0	hypothetical_protein	Amino_acid_transport_and_metabolism_genes:	Other_Degradation_of_small_molecules	-	-	YES	-	-	0	0	0	0	0	0	0	0	0	0	0	0	0	0	0	0	0	0	0	0	0	0	0	0	0	0	0	0	0	0	0	0	0	0
BPSS0195	260948	261823	-	0.653	291	-	0	hypothetical_protein	Amino_acid_transport_and_metabolism_genes:	Other_Degradation_of_small_molecules	-	-	YES	-	-	0	0	0	0	0	0	0	0	0	0	0	0	0	0	0	0	0	0	0	0	0	0	0	0	0	0	0	0	0	0	0	0	0	0
BPSS0196	261820	263265	-	0.717	481	accC	0	acetyl-CoA_carboxylase	Lipid_transport_and_metabolism_genes:	Fatty_acid_and_phosphatidic_acid_biosynthesis	-	-	YES	-	-	0	0	0	0	0	0	0	0	0	0	0	0	0	0	0	0	0	0	0	0	0	0	0	0	0	0	0	0	0	0	0	0	0	0
BPSS0197	263271	263537	-	0.678	88	-	0	acetyl-CoA_carboxylase	Lipid_transport_and_metabolism_genes:	biotin_carboxyl_carrier_protein_(BCCP)	-	-	YES	-	-	0	0	0	0	0	0	0	0	0	0	0	0	0	0	0	0	0	0	0	0	0	0	0	0	0	0	0	0	0	0	0	0	0	0
BPSS0216	291447	293084	-	0.746	545	-	0	hypothetical_protein	General_function_prediction_only_genes:	Inner_membrane	-	-	-	-	-	0	0	0	0	0	0	0	0	0	0	0	0	0	0	0	0	0	0	0	0	0	0	0	0	0	0	0	0	0	0	0	0	0	0
BPSS0229	312200	313861	-	0.687	553	-	0	hypothetical_protein	Inorganic_ion_transport_and_metabolism_genes:	Periplasmic/exported/lipoproteins	-	-	YES	-	-	0	0	0	0	0	0	0	0	0	0	0	0	0	0	0	0	0	0	0	0	0	0	0	0	0	0	0	0	0	0	0	0	0	0
BPSS0246	334048	334944	-	0.699	298	-	0	LysR-family_transcriptional_regulator	Transcription_genes:	LysR-family	-	-	YES	-	-	0	0	0	0	0	0	0	0	0	0	0	0	0	0	0	0	0	0	0	0	0	0	0	0	0	0	0	0	0	0	0	0	0	0
BPSS0247	335111	335959	+	0.676	282	-	0	ABC_transport_system,_membrane_protein	Amino_acid_transport_and_metabolism_genes:	Inner_membrane	-	-	YES	-	-	0	0	0	0	0	0	0	0	0	0	0	0	0	0	0	0	0	0	0	0	0	0	0	0	0	0	0	0	0	0	0	0	0	0
BPSS0248	335964	337007	+	0.726	347	-	0	ABC_transport_system,_ATP-binding_protein	Amino_acid_transport_and_metabolism_genes:	Inner_membrane	-	-	YES	-	-	0	0	0	0	0	0	0	0	0	0	0	0	0	0	0	0	0	0	0	0	0	0	0	0	0	0	0	0	0	0	0	0	0	0
BPSS0249	337034	338122	+	0.676	362	-	0	ABC_transport_system,_substrate-binding_exported_protein	Inorganic_ion_transport_and_metabolism_genes:	Periplasmic/exported/lipoproteins	-	-	YES	-	-	0	0	0	0	0	0	0	0	0	0	0	0	0	0	0	0	0	0	0	0	0	0	0	0	0	0	0	0	0	0	0	0	0	0
BPSS0250	338112	338960	+	0.695	282	-	0	ABC_transport_system,_membrane_protein	General_function_prediction_only_genes:	Inner_membrane	-	-	YES	-	-	0	0	0	0	0	0	0	0	0	0	0	0	0	0	0	0	0	0	0	0	0	0	0	0	0	0	0	0	0	0	0	0	0	0
BPSS0251	338974	339486	+	0.754	170	-	0	Lysine_decarboxylase_family_protein	General_function_prediction_only_genes:	Not_classified_(included_putative_assignments)	-	-	YES	-	-	0	0	0	0	0	0	0	0	0	0	0	0	0	0	0	0	0	0	0	0	0	0	0	0	0	0	0	0	0	0	0	0	0	0
BPSS0255	342542	344059	+	0.697	505	-	0	ribose_ABC_transport_system,_ATP-binding_protein	Carbohydrate_transport_and_metabolism_genes:	Carbohydrates,_organic_acids_and_alcohols	-	-	YES	-	-	0	0	0	0	0	0	0	0	0	0	0	0	0	0	0	0	0	0	0	0	0	0	0	0	0	0	0	0	0	0	0	0	0	0
BPSS0270	359105	360004	-	0.714	299	-	0	LysR-family_transcriptional_regulator	Transcription_genes:	LysR-family	-	-	-	metagene_conserved_in_Bp_Bm_Bc	-	0	0	0	0	0	0	0	0	0	0	0	0	0	0	0	0	0	0	0	0	0	0	0	0	0	0	0	0	0	0	0	0	0	0
BPSS0286	382862	383695	-	0.737	277	-	0	hypothetical_protein	General_function_prediction_only_genes:	Inner_membrane	-	-	-	metagene_conserved_in_Bp_Bm_Bc	-	0	0	0	0	0	0	0	0	0	0	0	0	0	0	0	0	0	0	0	0	0	0	0	0	0	0	0	0	0	0	0	0	0	0
BPSS0328	458196	459230	-	0.729	344	-	0	malate/L-lactate_dehydrogenase	Energy_production_and_conversion_genes:	Not_classified_(included_putative_assignments)	-	-	YES	metagene_conserved_in_Bp_Bm_Bc	-	0	0	0	0	0	0	0	0	0	0	0	0	0	0	0	0	0	0	0	0	0	0	0	0	0	0	0	0	0	0	0	0	0	0
BPSS0329	459223	460815	-	0.751	530	-	0	fatty_aldehyde_dehydrogenase	Energy_production_and_conversion_genes:	Other_Degradation_of_small_molecules	BPSS0329;BPSS0034	-	YES	-	-	0	0	0	0	0	0	0	0	0	0	0	0	0	0	0	0	0	0	0	0	0	0	0	0	0	0	0	0	0	0	0	0	0	0
BPSS0330	460891	462516	-	0.692	541	-	0	amino-acid_permease_membrane_protein	Amino_acid_transport_and_metabolism_genes:	Amino_acids_and_amines	-	-	YES	metagene_conserved_in_Bp_Bm_Bc	-	0	0	0	0	0	0	0	0	0	0	0	0	0	0	0	0	0	0	0	0	0	0	0	0	0	0	0	0	0	0	0	0	0	0
BPSS0332	464132	465064	+	0.731	310	-	0	hypothetical_protein	Amino_acid_transport_and_metabolism_genes:	amino_acids	-	-	YES	metagene_conserved_in_Bp_Bm_Bc	-	0	0	0	0	0	0	0	0	0	0	0	0	0	0	0	0	0	0	0	0	0	0	0	0	0	0	0	0	0	0	0	0	0	0
BPSS0333	465061	466194	+	0.754	377	-	0	oxidase	Amino_acid_transport_and_metabolism_genes:	Not_classified_(included_putative_assignments)	-	-	YES	metagene_conserved_in_Bp_Bm_Bc	-	0	0	0	0	0	0	0	0	0	0	0	0	0	0	0	0	0	0	0	0	0	0	0	0	0	0	0	0	0	0	0	0	0	0
BPSS0334	466191	466424	+	0.718	77	-	0	oxidase	General_function_prediction_only_genes:	Not_classified_(included_putative_assignments)	-	-	YES	metagene_conserved_in_Bp_Bm_Bc	-	0	0	0	0	0	0	0	0	0	0	0	0	0	0	0	0	0	0	0	0	0	0	0	0	0	0	0	0	0	0	0	0	0	0
BPSS0335	466421	467713	+	0.781	430	-	0	oxidoreductase	General_function_prediction_only_genes:	Not_classified_(included_putative_assignments)	-	-	YES	metagene_conserved_in_Bp_Bm_Bc	-	0	0	0	0	0	0	0	0	0	0	0	0	0	0	0	0	0	0	0	0	0	0	0	0	0	0	0	0	0	0	0	0	0	0
BPSS0339	470668	472722	-	0.706	684	-	0	amino_acid_dioxygenase	General_function_prediction_only_genes:	Amino_acids	-	-	YES	metagene_conserved_in_Bp_Bm_Bc	-	0	0	0	0	0	0	0	0	0	0	0	0	0	0	0	0	0	0	0	0	0	0	0	0	0	0	0	0	0	0	0	0	0	0
BPSS0340	472982	473437	+	0.691	151	aroQ2	0	3-dehydroquinate_dehydratase	Amino_acid_transport_and_metabolism_genes:	amino_acids	-	-	YES	-	-	0	0	0	0	0	0	0	0	0	0	0	0	0	0	0	0	0	0	0	0	0	0	0	0	0	0	0	0	0	0	0	0	0	0
BPSS0342	474336	475682	+	0.691	448	-	0	sugar_transport-related,_membrane_protein	General_function_prediction_only_genes:	Carbohydrates,_organic_acids_and_alcohols	-	-	YES	-	-	0	0	0	0	0	0	0	0	0	0	0	0	0	0	0	0	0	0	0	0	0	0	0	0	0	0	0	0	0	0	0	0	0	0
BPSS0382	522852	525719	-	0.678	955	-	GI_13	hypothetical_protein	Function_unknown_genes:	Unknown_function,_no_known_homologs	BPSS0382;BPSL0082	-	-	-	-	0	0	0	0	0	0	0	0	0	0	0	0	0	0	0	0	0	0	0	0	0	0	0	0	0	0	0	0	0	0	0	0	0	0
BPSS0393	538558	538797	-	0.724	-	-	0	Gene_remnant._Similar_to_the_N-terminal_region_of_Bacteriophage_phiE125_Gp70_SWALL:Q8W6N0_(EMBL:AF447491)_(118_aa)_fasta_scores:_E():_1.5e-30,_89.87%_id_in_79_aa,_and_of_bacteriophage_SFV_hypothetical_13.1_kDa_protein_ORF53_SWALL:Q8SBD7_(EMBL:U82619)_(116_aa)_fasta_scores:_E():_4e-12,_49.33%_id_in_75_aa	Not_in_COGs_genes:	Transposon-related_functions	-	-	-	-	-	0	0	0	0	0	0	0	0	0	0	0	0	0	0	0	0	0	0	0	0	0	0	0	0	0	0	0	0	0	0	0	0	0	0
BPSS0402	542523	543698	+	0.608	391	-	0	bacteriophage/transposase_fusion_protein	Posttranslational_modification,_protein_turnover,_chaperones_genes:	Laterally_acquired_elements	-	-	-	-	-	0	0	0	0	0	0	0	0	0	0	0	0	0	0	0	0	0	0	0	0	0	0	0	0	0	0	0	0	0	0	0	0	0	0
BPSS0402A	543697	544086	+	0.712	-	-	0	Probable_gene_remnant._Similar_to_the_C-terminal_region_of_Coxiella_burnetii_transposase_for_insertion_sequence_element_IS1111a_SWALL:TRA1_COXBU_(SWALL:Q45968)_(339_aa)_fasta_scores:_E():_4.9e-23,_54.54%_id_in_132_aa,_and_to_Edwardsiella_ictaluri_RmpB-like_protein_SWALL:Q6GUC9_(EMBL:AY641982)_(358_aa)_fasta_scores:_E():_7.4e-29,_59.39%_id_in_133_aa	Not_in_COGs_genes:	Transposon-related_functions	-	-	-	-	-	0	0	0	0	0	0	0	0	0	0	0	0	0	0	0	0	0	0	0	0	0	0	0	0	0	0	0	0	0	0	0	0	0	0
BPSS0412	567424	567849	-	0.624	141	-	0	hypothetical_protein	Not_in_COGs_genes:	Unknown_function,_no_known_homologs	-	-	-	-	-	0	0	0	0	0	0	0	0	0	0	0	0	0	0	0	0	0	0	0	0	0	0	0	0	0	0	0	0	0	0	0	0	0	0
BPSS0436	598494	599396	-	0.704	300	-	0	AraC-family_regulatory_protein	Transcription_genes:	AraC-family	-	-	YES	-	-	0	0	0	0	0	0	0	0	0	0	0	0	0	0	0	0	0	0	0	0	0	0	0	0	0	0	0	0	0	0	0	0	0	0
BPSS0437	599746	600948	-	0.704	400	-	0	transporter_protein	General_function_prediction_only_genes:	Inner_membrane	-	-	YES	-	-	0	0	0	0	0	0	0	0	0	0	0	0	0	0	0	0	0	0	0	0	0	0	0	0	0	0	0	0	0	0	0	0	0	0
BPSS0438	601354	602265	+	0.704	303	-	0	LysR-family_transcriptional_regulator	Transcription_genes:	LysR-family	-	-	YES	-	-	0	0	0	0	0	0	0	0	0	0	0	0	0	0	0	0	0	0	0	0	0	0	0	0	0	0	0	0	0	0	0	0	0	0
BPSS0443	607554	608903	+	0.701	449	-	0	hypothetical_protein	Not_in_COGs_genes:	Conserved_in_other_organisms	-	Positive_selection;-	YES	-	-	0	0	0	0	0	0	0	0	0	0	0	0	0	0	0	0	0	0	0	0	0	0	0	0	0	0	0	0	0	0	0	0	0	0
BPSS0465	634214	635194	-	0.659	326	potH	0	putrescine_ABC_transport_system,_permease_protein	Amino_acid_transport_and_metabolism_genes:	Other_Transport/binding_proteins	BPSS0465;BPSL1557	-	YES	-	-	0	0	0	0	0	0	0	0	0	0	0	0	0	0	0	0	0	0	0	0	0	0	0	0	0	0	0	0	0	0	0	0	0	0
BPSS0466	635191	636345	-	0.649	384	potG	0	putrescine_ABC_transport_system,_ATP-binding_protein	Amino_acid_transport_and_metabolism_genes:	Other_Transport/binding_proteins	BPSS0466;BPSL1556	-	YES	-	-	0	0	0	0	0	0	0	0	0	0	0	0	0	0	0	0	0	0	0	0	0	0	0	0	0	0	0	0	0	0	0	0	0	0
BPSS0471	641574	641981	+	0.63	135	-	0	hypothetical_protein	Not_in_COGs_genes:	Unknown_function,_no_known_homologs	-	-	-	-	-	0	0	0	0	0	0	0	0	0	0	0	0	0	0	0	0	0	0	0	0	0	0	0	0	0	0	0	0	0	0	0	0	0	0
BPSS0475	645652	646065	+	0.688	137	-	0	hypothetical_protein	Not_in_COGs_genes:	Unknown_function,_no_known_homologs	-	-	YES	-	-	0	0	0	0	0	0	0	0	0	0	0	0	0	0	0	0	0	0	0	0	0	0	0	0	0	0	0	0	0	0	0	0	0	0
BPSS0480	652422	652544	+	0.333	40	-	0	hypothetical_protein	Not_in_COGs_genes:	Unknown_function,_no_known_homologs	-	-	-	-	-	0	0	0	0	0	0	0	0	0	0	0	0	0	0	0	0	0	0	0	0	0	0	0	0	0	0	0	0	0	0	0	0	0	0
BPSS0499	677417	680839	+	0.693	1140	-	0	transglutaminase-like_superfamily_protein	Function_unknown_genes:	Not_classified_(included_putative_assignments)	-	-	YES	metagene_conserved_in_Bp_Bm_Bc	-	0	0	0	0	0	0	0	0	0	0	0	0	0	0	0	0	0	0	0	0	0	0	0	0	0	0	0	0	0	0	0	0	0	0
BPSS0503	686521	687708	+	0.686	395	-	0	transporter_protein	General_function_prediction_only_genes:	Transport/binding_proteins	-	-	YES	metagene_conserved_in_Bp_Bm_Bc	-	0	0	0	0	0	0	0	0	0	0	0	0	0	0	0	0	0	0	0	0	0	0	0	0	0	0	0	0	0	0	0	0	0	0
BPSS0506	690465	691163	+	0.708	232	-	0	DJ-1/PfpI_family_protein	General_function_prediction_only_genes:	Not_classified_(included_putative_assignments)	-	-	YES	-	-	0	0	0	0	0	0	0	0	0	0	0	0	0	0	0	0	0	0	0	0	0	0	0	0	0	0	0	0	0	0	0	0	0	0
BPSS0542	739867	741531	-	0.678	554	-	0	glycosyl_hydrolase	Carbohydrate_transport_and_metabolism_genes:	Not_classified_(included_putative_assignments)	-	-	YES	metagene_conserved_in_Bp_Bm_Bc	-	0	0	0	0	0	0	0	0	0	0	0	0	0	0	0	0	0	0	0	0	0	0	0	0	0	0	0	0	0	0	0	0	0	0
BPSS0559	763153	764052	-	0.726	299	-	0	LysR_family_regulatory_protein	Transcription_genes:	LysR-family	-	Positive_selection;Sanger_gene_slightly_longer	YES	metagene_conserved_in_Bp_Bm_Bc	-	0	0	0	0	0	0	0	0	0	0	0	0	0	0	0	0	0	0	0	0	0	0	0	0	0	0	0	0	0	0	0	0	0	0
BPSS0565	771719	772663	-	0.671	314	-	0	AraC_family_regulatory_protein	Transcription_genes:	AraC-family	-	-	YES	metagene_conserved_in_Bp_Bm_Bc	-	0	0	0	0	0	0	0	0	0	0	0	0	0	0	0	0	0	0	0	0	0	0	0	0	0	0	0	0	0	0	0	0	0	0
BPSS0566	772931	773881	+	0.64	316	-	0	lipoprotein	Amino_acid_transport_and_metabolism_genes:	Periplasmic/exported/lipoproteins	BPSS0566;BPSS1423	-	YES	-	-	0	0	0	0	0	0	0	0	0	0	0	0	0	0	0	0	0	0	0	0	0	0	0	0	0	0	0	0	0	0	0	0	0	0
BPSS0567	773964	774893	+	0.701	309	-	0	hypothetical_protein	Function_unknown_genes:	Conserved_in_other_organisms	-	-	YES	metagene_conserved_in_Bp_Bm_Bc	-	0	0	0	0	0	0	0	0	0	0	0	0	0	0	0	0	0	0	0	0	0	0	0	0	0	0	0	0	0	0	0	0	0	0
BPSS0568	775008	775973	+	0.686	321	-	0	3-hydroxybutyryl-CoA_dehydrogenase	Lipid_transport_and_metabolism_genes:	Not_classified_(included_putative_assignments)	-	-	YES	metagene_conserved_in_Bp_Bm_Bc	-	0	0	0	0	0	0	0	0	0	0	0	0	0	0	0	0	0	0	0	0	0	0	0	0	0	0	0	0	0	0	0	0	0	0
BPSS0569	775991	776473	+	0.694	160	-	0	hypothetical_protein	General_function_prediction_only_genes:	Not_classified_(included_putative_assignments)	-	-	YES	metagene_conserved_in_Bp_Bm_Bc	-	0	0	0	0	0	0	0	0	0	0	0	0	0	0	0	0	0	0	0	0	0	0	0	0	0	0	0	0	0	0	0	0	0	0
BPSS0570	776509	777468	+	0.737	319	-	0	hypothetical_protein	Lipid_transport_and_metabolism_genes:	Not_classified_(included_putative_assignments)	-	-	YES	metagene_conserved_in_Bp_Bm_Bc	-	0	0	0	0	0	0	0	0	0	0	0	0	0	0	0	0	0	0	0	0	0	0	0	0	0	0	0	0	0	0	0	0	0	0
BPSS0600	821085	821369	+	0.649	94	-	0	hypothetical_protein	Not_in_COGs_genes:	Inner_membrane	-	-	-	-	-	0	0	0	0	0	0	0	0	0	0	0	0	0	0	0	0	0	0	0	0	0	0	0	0	0	0	0	0	0	0	0	0	0	0
BPSS0602	823379	824005	+	0.673	208	-	0	hypothetical_protein	Not_in_COGs_genes:	Unknown_function,_no_known_homologs	-	-	YES	-	-	0	0	0	0	0	0	0	0	0	0	0	0	0	0	0	0	0	0	0	0	0	0	0	0	0	0	0	0	0	0	0	0	0	0
BPSS0633A	865609	865848	-	0.683	-	-	0	Probable_gene_remnant._Similar_to_the_C-terminal_regions_of_Thiobacillus_ferrooxidans_cytochrome_c-552_precursor_Cyc1_SWALL:C552_THIFE_(SWALL:P74917)_(230_aa)_fasta_scores:_E():_3.1e-07,_47.94%_id_in_73_aa,_and_to_Ralstonia_solanacearum_putative_cytochrome_c_signal_peptide_protein_RS00629_SWALL:Q8Y2Y4_(EMBL:AL646058)_(206_aa)_fasta_scores:_E():_1.6e-14,_74.62%_id_in_67_aa	Not_in_COGs_genes:	other	-	-	YES	-	-	0	0	0	0	0	0	0	0	0	0	0	0	0	0	0	0	0	0	0	0	0	0	0	0	0	0	0	0	0	0	0	0	0	0
BPSS0637	869730	870765	-	0.701	-	-	0	Similar_to_Streptomyces_coelicolor_putative_lyase_SCO5222_or_SC7E4.19_SWALL:Q9K499_(EMBL:AL939123)_(361_aa)_fasta_scores:_E():_4.3e-44,_42.35%_id_in_340_aa,_and_to_Anabaena_sp._hypothetical_protein_alr4685_SWALL:Q8YN85_(EMBL:AP003597)_(322_aa)_fasta_scores:_E():_6.7e-07,_22.75%_id_in_312_aa_CDS_contains_a_frameshifts_after_codons_2_and_232	Not_in_COGs_genes:	Conserved_in_other_organisms	-	-	-	-	-	0	0	0	0	0	0	0	0	0	0	0	0	0	0	0	0	0	0	0	0	0	0	0	0	0	0	0	0	0	0	0	0	0	0
BPSS0647	879561	880028	-	0.694	155	-	0	hypothetical_protein	Inorganic_ion_transport_and_metabolism_genes:	Not_classified_(included_putative_assignments)	-	-	YES	metagene_conserved_in_Bp_Bm_Bc	-	0	0	0	0	0	0	0	0	0	0	0	0	0	0	0	0	0	0	0	0	0	0	0	0	0	0	0	0	0	0	0	0	0	0
BPSS0653	886326	886544	+	0.692	-	-	GI_14	Probable_gene_remnant._Similar_to_the_C-terminal_regions_of_Pseudomonas_aeruginosa_transposase_for_transposon_Tn501_TnpA_SWALL:TNP5_PSEAE_(SWALL:P06695)_(988_aa)_fasta_scores:_E():_1.4e-08,_47.43%_id_in_78_aa,_and_to_Pseudomonas_putida_Tn4653_transposase_TnpA_SWALL:Q8VMH0_(EMBL:AJ344068)_(988_aa)_fasta_scores:_E():_5.6e-09,_48.68%_id_in_76_aa	Not_in_COGs_genes:	Transposon-related_functions	-	-	-	-	-	0	0	0	0	0	0	0	0	0	0	0	0	0	0	0	0	0	0	0	0	0	0	0	0	0	0	0	0	0	0	0	0	0	0
BPSS0669	905454	906683	-	0.702	409	-	0	hypothetical_protein	Function_unknown_genes:	Conserved_in_other_organisms	-	-	YES	metagene_conserved_in_Bp_Bm_Bc	-	0	0	0	0	0	0	0	0	0	0	0	0	0	0	0	0	0	0	0	0	0	0	0	0	0	0	0	0	0	0	0	0	0	0
BPSS0701	941677	942768	-	0.683	363	-	0	outer_membrane_porin_protein	Cell_wall/membrane_biogenesis_genes:	Outer_membrane_constituents	-	-	YES	-	-	0	0	0	0	0	0	0	0	0	0	0	0	0	0	0	0	0	0	0	0	0	0	0	0	0	0	0	0	0	0	0	0	0	0
BPSS0702	943253	944320	-	0.715	355	-	0	ATP-binding_ABC_transporter_protein	Amino_acid_transport_and_metabolism_genes:	Transport/binding_proteins	-	-	YES	metagene_conserved_in_Bp_Bm_Bc	-	0	0	0	0	0	0	0	0	0	0	0	0	0	0	0	0	0	0	0	0	0	0	0	0	0	0	0	0	0	0	0	0	0	0
BPSS0703	944313	946082	-	0.692	589	-	0	transmembrane_ABC_transporter_protein	Inorganic_ion_transport_and_metabolism_genes:	Transport/binding_proteins	-	-	YES	-	-	0	0	0	0	0	0	0	0	0	0	0	0	0	0	0	0	0	0	0	0	0	0	0	0	0	0	0	0	0	0	0	0	0	0
BPSS0717	964746	966038	-	0.699	430	-	0	hypothetical_protein	Signal_transduction_mechanisms_genes:	Inner_membrane	-	-	YES	-	-	0	0	0	0	0	0	0	0	0	0	0	0	0	0	0	0	0	0	0	0	0	0	0	0	0	0	0	0	0	0	0	0	0	0
BPSS0727	977546	978265	+	0.718	239	-	0	hypothetical_protein	General_function_prediction_only_genes:	Not_classified_(included_putative_assignments)	-	-	YES	metagene_conserved_in_Bp_Bm_Bc	-	0	0	0	0	0	0	0	0	0	0	0	0	0	0	0	0	0	0	0	0	0	0	0	0	0	0	0	0	0	0	0	0	0	0
BPSS0734	985782	987641	-	0.709	619	oprM	0	outer_membrane_efflux_protein	Intracellular_trafficking_and_secretion_genes:	Outer_membrane_constituents	-	-	YES	-	-	0	0	0	0	0	0	0	0	0	0	0	0	0	0	0	0	0	0	0	0	0	0	0	0	0	0	0	0	0	0	0	0	0	0
BPSS0735	987699	989666	-	0.706	655	-	0	glycosyl_transferase	Cell_wall/membrane_biogenesis_genes:	Not_classified_(included_putative_assignments)	-	-	YES	-	-	0	0	0	0	0	0	0	0	0	0	0	0	0	0	0	0	0	0	0	0	0	0	0	0	0	0	0	0	0	0	0	0	0	0
BPSS0736	989669	990994	-	0.76	441	-	0	hypothetical_protein	Not_in_COGs_genes:	Conserved_in_other_organisms	-	Positive_selection;-	YES	-	-	0	0	0	0	0	0	0	0	0	0	0	0	0	0	0	0	0	0	0	0	0	0	0	0	0	0	0	0	0	0	0	0	0	0
BPSS0737	991009	992559	-	0.722	516	-	0	hypothetical_protein	Cell_wall/membrane_biogenesis_genes:	Inner_membrane	-	-	YES	-	-	0	0	0	0	0	0	0	0	0	0	0	0	0	0	0	0	0	0	0	0	0	0	0	0	0	0	0	0	0	0	0	0	0	0
BPSS0738A	994109	994471	-	0.733	120	-	0	hypothetical_protein	Not_in_COGs_genes:	Unknown_function,_no_known_homologs	-	-	-	-	-	0	0	0	0	0	0	0	0	0	0	0	0	0	0	0	0	0	0	0	0	0	0	0	0	0	0	0	0	0	0	0	0	0	0
BPSS0743	999777	1001294	+	0.69	505	-	0	methylmalonate-semialdehyde_dehydrogenase	Energy_production_and_conversion_genes:	Amino_acids	-	-	YES	-	-	0	0	0	0	0	0	0	0	0	0	0	0	0	0	0	0	0	0	0	0	0	0	0	0	0	0	0	0	0	0	0	0	0	0
BPSS0745	1001970	1002458	-	0.622	162	-	0	hypothetical_protein	Cell_wall/membrane_biogenesis_genes:	Unknown_function,_no_known_homologs	-	-	YES	-	-	0	0	0	0	0	0	0	0	0	0	0	0	0	0	0	0	0	0	0	0	0	0	0	0	0	0	0	0	0	0	0	0	0	0
BPSS0747	1004758	1005855	+	0.657	365	-	0	outer_membrane_porin_protein	Cell_wall/membrane_biogenesis_genes:	Outer_membrane_constituents	-	-	YES	-	-	0	0	0	0	0	0	0	0	0	0	0	0	0	0	0	0	0	0	0	0	0	0	0	0	0	0	0	0	0	0	0	0	0	0
BPSS0749	1007013	1007813	-	0.692	266	-	0	GerE_familyregulatory_protein	Transcription_genes:	LuxR_(GerR)-family	-	-	YES	metagene_conserved_in_Bp_Bm_Bc	-	0	0	0	0	0	0	0	0	0	0	0	0	0	0	0	0	0	0	0	0	0	0	0	0	0	0	0	0	0	0	0	0	0	0
BPSS0750	1007935	1009344	+	0.685	469	-	0	amino_acid_permease	Amino_acid_transport_and_metabolism_genes:	Not_classified_(included_putative_assignments)	-	Positive_selection;-	YES	metagene_conserved_in_Bp_Bm_Bc	-	0	0	0	0	0	0	0	0	0	0	0	0	0	0	0	0	0	0	0	0	0	0	0	0	0	0	0	0	0	0	0	0	0	0
BPSS0752	1010507	1012153	-	0.69	548	-	0	lipoprotein	Not_in_COGs_genes:	Periplasmic/exported/lipoproteins	-	Positive_selection;-	YES	metagene_conserved_in_Bp_Bm_Bc	-	0	0	0	0	0	0	0	0	0	0	0	0	0	0	0	0	0	0	0	0	0	0	0	0	0	0	0	0	0	0	0	0	0	0
BPSS0753	1012328	1012648	-	0.639	106	-	0	hypothetical_protein	Not_in_COGs_genes:	Unknown_function,_no_known_homologs	-	-	YES	metagene_conserved_in_Bp_Bm_Bc	-	0	0	0	0	0	0	0	0	0	0	0	0	0	0	0	0	0	0	0	0	0	0	0	0	0	0	0	0	0	0	0	0	0	0
BPSS0754	1012673	1014904	-	0.705	743	-	0	hypothetical_protein	Function_unknown_genes:	Inner_membrane	-	-	YES	metagene_conserved_in_Bp_Bm_Bc	-	0	0	0	0	0	0	0	0	0	0	0	0	0	0	0	0	0	0	0	0	0	0	0	0	0	0	0	0	0	0	0	0	0	0
BPSS0756	1016647	1016949	-	0.696	100	-	0	hypothetical_protein	Not_in_COGs_genes:	Periplasmic/exported/lipoproteins	-	-	YES	-	-	0	0	0	0	0	0	0	0	0	0	0	0	0	0	0	0	0	0	0	0	0	0	0	0	0	0	0	0	0	0	0	0	0	0
BPSS0769	1030401	1031381	-	0.75	326	-	0	hypothetical_protein	Lipid_transport_and_metabolism_genes:	Periplasmic/exported/lipoproteins	-	-	-	-	-	0	0	0	0	0	0	0	0	0	0	0	0	0	0	0	0	0	0	0	0	0	0	0	0	0	0	0	0	0	0	0	0	0	0
BPSS0773	1035290	1035899	-	0.709	-	-	0	Gene_remnant._Similar_to_the_C-terminal_regions_of_Azospirillum_brasilense_galactose-binding_protein_regulator_GbpR_SWALL:GBPR_AZOBR_(SWALL:P52661)_(342_aa)_fasta_scores:_E():_3.4e-15,_30.36%_id_in_191_aa,_and_Xanthomonas_campestris_galactose-binding_protein_regulator_xcc1748_SWALL:Q8P9U9_(EMBL:AE012276)_(323_aa)_fasta_scores:_E():_2.1e-20,_37.3%_id_in_193_aa._CDS_contains_a_frameshift_mutation_a…	Not_in_COGs_genes:	LysR-family	-	-	YES	-	-	0	0	0	0	0	0	0	0	0	0	0	0	0	0	0	0	0	0	0	0	0	0	0	0	0	0	0	0	0	0	0	0	0	0
BPSS0774	1035907	1036648	+	0.728	-	-	0	Gene_remnant._Similar_to_the_C-terminal_regions_of_Escherichia_coli,_and_Shigella_flexneri_L-arabinose_transport_system_permease_protein_AraH_SWALL:ARAH_ECOLI_(SWALL:P08532)_(329_aa)_fasta_scores:_E():_7.8e-39,_48%_id_in_250_aa,_and_Ralstonia_solanacearum_probable_L-arabinose_transmembrane_ABC_transporter_protein_rsc2756_or_rs00098_SWALL:Q8XVS3_(EMBL:AL646071)_(335_aa)_fasta_scores:_E():_9.5e-40,…	Not_in_COGs_genes:	Carbohydrates,_organic_acids_and_alcohols	-	-	-	-	-	0	0	0	0	0	0	0	0	0	0	0	0	0	0	0	0	0	0	0	0	0	0	0	0	0	0	0	0	0	0	0	0	0	0
BPSS0776	1036929	1037864	+	0.731	311	-	0	hypothetical_protein	Carbohydrate_transport_and_metabolism_genes:	Not_classified_(included_putative_assignments)	-	Positive_selection;-	YES	metagene_conserved_in_Bp_Bm_Bc	-	0	0	0	0	0	0	0	0	0	0	0	0	0	0	0	0	0	0	0	0	0	0	0	0	0	0	0	0	0	0	0	0	0	0
BPSS0779	1041219	1042046	+	0.663	275	-	0	enoyl-CoA_hydratase	Lipid_transport_and_metabolism_genes:	Not_classified_(included_putative_assignments)	-	-	-	-	-	0	0	0	0	0	0	0	0	0	0	0	0	0	0	0	0	0	0	0	0	0	0	0	0	0	0	0	0	0	0	0	0	0	0
BPSS0780	1042213	1043661	+	0.749	482	-	0	aldehyde_dehydrogenase_family_protein	Energy_production_and_conversion_genes:	Not_classified_(included_putative_assignments)	BPSS0780;BPSL0843	-	-	-	-	0	0	0	0	0	0	0	0	0	0	0	0	0	0	0	0	0	0	0	0	0	0	0	0	0	0	0	0	0	0	0	0	0	0
BPSS0781	1043679	1045535	+	0.725	618	-	0	feruloyl-CoA_synthase	Secondary_metabolites_biosynthesis,_transport_and_catabolism_genes:	Not_classified_(included_putative_assignments)	-	-	-	-	-	0	0	0	0	0	0	0	0	0	0	0	0	0	0	0	0	0	0	0	0	0	0	0	0	0	0	0	0	0	0	0	0	0	0
BPSS0782	1045840	1047045	+	0.74	401	-	0	sugar_transport_protein	General_function_prediction_only_genes:	Carbohydrates,_organic_acids_and_alcohols	-	-	-	-	-	0	0	0	0	0	0	0	0	0	0	0	0	0	0	0	0	0	0	0	0	0	0	0	0	0	0	0	0	0	0	0	0	0	0
BPSS0783	1047507	1048646	+	0.717	379	-	0	outer_membrane_porin_protein	Cell_wall/membrane_biogenesis_genes:	Outer_membrane_constituents	-	-	-	-	-	0	0	0	0	0	0	0	0	0	0	0	0	0	0	0	0	0	0	0	0	0	0	0	0	0	0	0	0	0	0	0	0	0	0
BPSS0784	1048719	1050443	+	0.715	574	-	0	hypothetical_protein	Not_in_COGs_genes:	Not_classified_(included_putative_assignments)	-	-	YES	-	-	0	0	0	0	0	0	0	0	0	0	0	0	0	0	0	0	0	0	0	0	0	0	0	0	0	0	0	0	0	0	0	0	0	0
BPSS0791	1057247	1058086	+	0.733	279	-	0	hypothetical_protein	General_function_prediction_only_genes:	Not_classified_(included_putative_assignments)	-	-	YES	-	-	0	0	0	0	0	0	0	0	0	0	0	0	0	0	0	0	0	0	0	0	0	0	0	0	0	0	0	0	0	0	0	0	0	0
BPSS0792	1058226	1058969	+	0.706	247	-	0	short_chain_dehydrogenase	General_function_prediction_only_genes:	Not_classified_(included_putative_assignments)	-	-	YES	metagene_conserved_in_Bp_Bm_Bc	-	0	0	0	0	0	0	0	0	0	0	0	0	0	0	0	0	0	0	0	0	0	0	0	0	0	0	0	0	0	0	0	0	0	0
BPSS0793	1059045	1059887	+	0.693	280	-	0	fumarylacetoacetate_(FAA)_hydrolase_family_protein	Secondary_metabolites_biosynthesis,_transport_and_catabolism_genes:	Not_classified_(included_putative_assignments)	BPSS0793;BPSS2126	-	YES	-	-	0	0	0	0	0	0	0	0	0	0	0	0	0	0	0	0	0	0	0	0	0	0	0	0	0	0	0	0	0	0	0	0	0	0
BPSS0794	1060055	1060831	+	0.676	258	-	0	short_chain_dehydrogenase	General_function_prediction_only_genes:	Not_classified_(included_putative_assignments)	-	-	YES	metagene_conserved_in_Bp_Bm_Bc	-	0	0	0	0	0	0	0	0	0	0	0	0	0	0	0	0	0	0	0	0	0	0	0	0	0	0	0	0	0	0	0	0	0	0
BPSS0795	1060867	1061205	+	0.655	112	-	0	hypothetical_protein	Function_unknown_genes:	Conserved_in_other_organisms	-	-	YES	-	-	0	0	0	0	0	0	0	0	0	0	0	0	0	0	0	0	0	0	0	0	0	0	0	0	0	0	0	0	0	0	0	0	0	0
BPSS0797	1069699	1070439	-	0.676	246	-	0	IclR_family_regulatory_protein	Transcription_genes:	IclR-family	BPSS0797;BPSS0284	-	YES	-	-	0	0	0	0	0	0	0	0	0	0	0	0	0	0	0	0	0	0	0	0	0	0	0	0	0	0	0	0	0	0	0	0	0	0
BPSS0848	1137775	1138272	-	0.671	165	-	0	hypothetical_protein	Not_in_COGs_genes:	Inner_membrane	-	-	YES	-	-	0	0	0	0	0	0	0	0	0	0	0	0	0	0	0	0	0	0	0	0	0	0	0	0	0	0	0	0	0	0	0	0	0	0
BPSS0849	1138390	1139310	-	0.633	306	-	0	hypothetical_protein	General_function_prediction_only_genes:	Inner_membrane	-	-	YES	-	-	0	0	0	0	0	0	0	0	0	0	0	0	0	0	0	0	0	0	0	0	0	0	0	0	0	0	0	0	0	0	0	0	0	0
BPSS0858	1150469	1151061	+	0.727	-	-	0	Similar_to_the_N-terminal_regions_of_Bacillus_stearothermophilus_N-carbamoyl-L-amino_acid_hydrolase_AmaB_SWALL:AMB1_BACST_(SWALL:P37113)_(409_aa)_fasta_scores:_E():_2.3e-18,_41.17%_id_in_170_aa,_and_to_Pseudomonas_putida_putative_N-carbamoyl-beta-alanine_amidohydrolase_PP4034_SWALL:AAN69626_(EMBL:AE016789)_(427_aa)_fasta_scores:_E():_8.7e-35,_53.57%_id_in_196_aa._Contains_a_frameshift_after_codon…	Not_in_COGs_genes:	Pool,_multipurpose_conversions_of_intermed._met'm	-	-	YES	-	-	0	0	0	0	0	0	0	0	0	0	0	0	0	0	0	0	0	0	0	0	0	0	0	0	0	0	0	0	0	0	0	0	0	0
BPSS0866	1157810	1158565	+	0.757	251	-	0	short_chain_dehydrogenase	General_function_prediction_only_genes:	Not_classified_(included_putative_assignments)	-	-	YES	metagene_conserved_in_Bp_Bm_Bc	-	0	0	0	0	0	0	0	0	0	0	0	0	0	0	0	0	0	0	0	0	0	0	0	0	0	0	0	0	0	0	0	0	0	0
BPSS0867	1159092	1159799	+	0.718	235	-	0	GerE_family_regulatory_protein	Transcription_genes:	LuxR_(GerR)-family	-	-	YES	metagene_conserved_in_Bp_Bm_Bc	-	0	0	0	0	0	0	0	0	0	0	0	0	0	0	0	0	0	0	0	0	0	0	0	0	0	0	0	0	0	0	0	0	0	0
BPSS0870	1163154	1164644	+	0.694	496	-	0	amino_acid_permease	Amino_acid_transport_and_metabolism_genes:	Amino_acids_and_amines	-	-	YES	metagene_conserved_in_Bp_Bm_Bc	-	0	0	0	0	0	0	0	0	0	0	0	0	0	0	0	0	0	0	0	0	0	0	0	0	0	0	0	0	0	0	0	0	0	0
BPSS0871	1164641	1165261	+	0.75	206	-	0	hypothetical_protein	Not_in_COGs_genes:	Unknown_function,_no_known_homologs	-	-	YES	-	-	0	0	0	0	0	0	0	0	0	0	0	0	0	0	0	0	0	0	0	0	0	0	0	0	0	0	0	0	0	0	0	0	0	0
BPSS0873	1166507	1167709	+	0.653	400	-	0	porin_protein	Cell_wall/membrane_biogenesis_genes:	Outer_membrane_constituents	-	-	YES	metagene_conserved_in_Bp_Bm_Bc	-	0	0	0	0	0	0	0	0	0	0	0	0	0	0	0	0	0	0	0	0	0	0	0	0	0	0	0	0	0	0	0	0	0	0
BPSS0874	1167973	1168290	+	0.679	105	-	0	hypothetical_protein	Not_in_COGs_genes:	Unknown_function,_no_known_homologs	-	-	-	-	-	0	0	0	0	0	0	0	0	0	0	0	0	0	0	0	0	0	0	0	0	0	0	0	0	0	0	0	0	0	0	0	0	0	0
BPSS0893	1184982	1186070	-	0.665	362	-	0	porin_protein	Cell_wall/membrane_biogenesis_genes:	Outer_membrane_constituents	-	Positive_selection;Sanger_gene_slightly_shorter	YES	metagene_conserved_in_Bp_Bm_Bc	-	0	0	0	0	0	0	0	0	0	0	0	0	0	0	0	0	0	0	0	0	0	0	0	0	0	0	0	0	0	0	0	0	0	0
BPSS0897	1188246	1189004	+	0.733	252	-	0	short_chain_dehydrogenase	General_function_prediction_only_genes:	Not_classified_(included_putative_assignments)	-	-	YES	metagene_conserved_in_Bp_Bm_Bc	-	0	0	0	0	0	0	0	0	0	0	0	0	0	0	0	0	0	0	0	0	0	0	0	0	0	0	0	0	0	0	0	0	0	0
BPSS0900	1190495	1191349	+	0.683	284	-	0	IclR_family_regulatory_protein	Transcription_genes:	IclR-family	BPSS0900;BPSS0892	-	YES	-	-	0	0	0	0	0	0	0	0	0	0	0	0	0	0	0	0	0	0	0	0	0	0	0	0	0	0	0	0	0	0	0	0	0	0
BPSS0901	1191346	1192143	+	0.689	265	-	0	short_chain_dehydrogenase	General_function_prediction_only_genes:	Not_classified_(included_putative_assignments)	-	-	YES	metagene_conserved_in_Bp_Bm_Bc	-	0	0	0	0	0	0	0	0	0	0	0	0	0	0	0	0	0	0	0	0	0	0	0	0	0	0	0	0	0	0	0	0	0	0
BPSS0905	1196150	1197115	+	0.694	321	-	0	glyoxalase/bleomycin_resistance_protein/dioxygenase_superfamily_protein	Amino_acid_transport_and_metabolism_genes:	Not_classified_(included_putative_assignments)	-	-	YES	metagene_conserved_in_Bp_Bm_Bc	-	0	0	0	0	0	0	0	0	0	0	0	0	0	0	0	0	0	0	0	0	0	0	0	0	0	0	0	0	0	0	0	0	0	0
BPSS0906	1197141	1198355	+	0.724	404	-	0	pyridine_nucleotide-disulphide_oxidoreductase	General_function_prediction_only_genes:	Not_classified_(included_putative_assignments)	-	-	YES	metagene_conserved_in_Bp_Bm_Bc	-	0	0	0	0	0	0	0	0	0	0	0	0	0	0	0	0	0	0	0	0	0	0	0	0	0	0	0	0	0	0	0	0	0	0
BPSS0907	1198390	1199796	+	0.682	468	-	0	transport_protein	General_function_prediction_only_genes:	Transport/binding_proteins	-	-	YES	metagene_conserved_in_Bp_Bm_Bc	-	0	0	0	0	0	0	0	0	0	0	0	0	0	0	0	0	0	0	0	0	0	0	0	0	0	0	0	0	0	0	0	0	0	0
BPSS0922	1216729	1218006	+	0.64	425	-	0	transporter_protein	General_function_prediction_only_genes:	Transport/binding_proteins	-	-	YES	-	-	0	0	0	0	0	0	0	0	0	0	0	0	0	0	0	0	0	0	0	0	0	0	0	0	0	0	0	0	0	0	0	0	0	0
BPSS0923	1218570	1219523	-	0.698	317	-	0	hydrolase	General_function_prediction_only_genes:	Not_classified_(included_putative_assignments)	-	-	YES	-	-	0	0	0	0	0	0	0	0	0	0	0	0	0	0	0	0	0	0	0	0	0	0	0	0	0	0	0	0	0	0	0	0	0	0
BPSS0941	1241388	1242260	-	0.702	290	-	0	hypothetical_protein	General_function_prediction_only_genes:	Periplasmic/exported/lipoproteins	-	-	YES	metagene_conserved_in_Bp_Bm_Bc	-	0	0	0	0	0	0	0	0	0	0	0	0	0	0	0	0	0	0	0	0	0	0	0	0	0	0	0	0	0	0	0	0	0	0
BPSS0942	1242298	1243464	-	0.694	388	-	0	hypothetical_protein	Function_unknown_genes:	Inner_membrane	-	-	YES	-	-	0	0	0	0	0	0	0	0	0	0	0	0	0	0	0	0	0	0	0	0	0	0	0	0	0	0	0	0	0	0	0	0	0	0
BPSS0988	1306219	1307496	+	0.718	425	-	0	hypothetical_protein	General_function_prediction_only_genes:	Inner_membrane	-	-	YES	-	-	0	0	0	0	0	0	0	0	0	0	0	0	0	0	0	0	0	0	0	0	0	0	0	0	0	0	0	0	0	0	0	0	0	0
BPSS0989	1307541	1308083	-	0.705	180	-	0	hypothetical_protein	Not_in_COGs_genes:	Inner_membrane	-	-	YES	-	-	0	0	0	0	0	0	0	0	0	0	0	0	0	0	0	0	0	0	0	0	0	0	0	0	0	0	0	0	0	0	0	0	0	0
BPSS1003	1323383	1323721	-	0.628	112	-	0	hypothetical_protein	Not_in_COGs_genes:	Unknown_function,_no_known_homologs	-	-	-	-	-	0	0	0	0	0	0	0	0	0	0	0	0	0	0	0	0	0	0	0	0	0	0	0	0	0	0	0	0	0	0	0	0	0	0
BPSS1052	1430895	1432688	+	0.639	597	-	GI_15	hypothetical_bacteriophage_replication_protein	Not_in_COGs_genes:	Phage-related_functions_and_prophages	-	-	-	-	-	0	0	0	0	0	0	0	0	0	0	0	0	0	0	0	0	0	0	0	0	0	0	0	0	0	0	0	0	0	0	0	0	0	0
BPSS1053	1432704	1432970	+	0.667	88	-	GI_15	hypothetical_bacteriophage-acquired_protein	Not_in_COGs_genes:	Phage-related_functions_and_prophages	-	-	-	-	-	0	0	0	0	0	0	0	0	0	0	0	0	0	0	0	0	0	0	0	0	0	0	0	0	0	0	0	0	0	0	0	0	0	0
BPSS1054	1432967	1433173	+	0.667	68	-	GI_15	hypothetical_bacteriophage-acquired_protein	Not_in_COGs_genes:	Phage-related_functions_and_prophages	-	-	-	-	-	0	0	0	0	0	0	0	0	0	0	0	0	0	0	0	0	0	0	0	0	0	0	0	0	0	0	0	0	0	0	0	0	0	0
BPSS1055	1433260	1433916	+	0.665	218	-	GI_15	partition_protein	Cell_cycle_control,_mitosis_and_meiosis_genes:	Phage-related_functions_and_prophages	-	-	-	-	-	0	0	0	0	0	0	0	0	0	0	0	0	0	0	0	0	0	0	0	0	0	0	0	0	0	0	0	0	0	0	0	0	0	0
BPSS1124	1509034	1510017	+	0.715	327	-	0	hypothetical_protein	Function_unknown_genes:	Not_classified_(included_putative_assignments)	-	-	-	-	-	0	0	0	0	0	0	0	0	0	0	0	0	0	0	0	0	0	0	0	0	0	0	0	0	0	0	0	0	0	0	0	0	0	0
BPSS1125	1510127	1511314	+	0.769	395	-	0	riboflavin_biosynthesis_protein	Coenzyme_transport_and_metabolism_genes:	Riboflavin	-	-	-	-	-	0	0	0	0	0	0	0	0	0	0	0	0	0	0	0	0	0	0	0	0	0	0	0	0	0	0	0	0	0	0	0	0	0	0
BPSS1135	1521595	1522425	+	0.747	276	-	0	hydroxyethylthioazole_kinase	Coenzyme_transport_and_metabolism_genes:	Thiamin	-	-	-	-	-	0	0	0	0	0	0	0	0	0	0	0	0	0	0	0	0	0	0	0	0	0	0	0	0	0	0	0	0	0	0	0	0	0	0
BPSS1224	1655766	1657739	+	0.683	657	-	0	hypothetical_protein	Defense_mechanisms_genes:	Periplasmic/exported/lipoproteins	-	-	YES	-	-	0	0	0	0	0	0	0	0	0	0	0	0	0	0	0	0	0	0	0	0	0	0	0	0	0	0	0	0	0	0	0	0	0	0
BPSS1225	1657753	1658109	+	0.7	118	-	0	hypothetical_protein	General_function_prediction_only_genes:	Inner_membrane	-	-	YES	-	-	0	0	0	0	0	0	0	0	0	0	0	0	0	0	0	0	0	0	0	0	0	0	0	0	0	0	0	0	0	0	0	0	0	0
BPSS1226	1658338	1658616	+	0.71	92	-	0	hypothetical_protein	Not_in_COGs_genes:	Unknown_function,_no_known_homologs	-	-	YES	-	-	0	0	0	0	0	0	0	0	0	0	0	0	0	0	0	0	0	0	0	0	0	0	0	0	0	0	0	0	0	0	0	0	0	0
BPSS1230	1661727	1662884	+	0.731	385	-	0	transport_protein	General_function_prediction_only_genes:	Transport/binding_proteins	-	-	YES	-	-	0	0	0	0	0	0	0	0	0	0	0	0	0	0	0	0	0	0	0	0	0	0	0	0	0	0	0	0	0	0	0	0	0	0
BPSS1244	1683992	1685317	-	0.711	441	-	0	nitrate_transporter	Inorganic_ion_transport_and_metabolism_genes:	Anions	-	-	YES	metagene_conserved_in_Bp_Bm_Bc	-	0	0	0	0	0	0	0	0	0	0	0	0	0	0	0	0	0	0	0	0	0	0	0	0	0	0	0	0	0	0	0	0	0	0
BPSS1248	1689206	1689838	-	0.676	210	folE	0	GTP_cyclohydrolase_I	Coenzyme_transport_and_metabolism_genes:	Folic_acid	BPSS1248;BPSS1514	-	YES	-	-	0	0	0	0	0	0	0	0	0	0	0	0	0	0	0	0	0	0	0	0	0	0	0	0	0	0	0	0	0	0	0	0	0	0
BPSS1256	1700846	1701589	+	0.726	247	-	0	short-chain_type_dehydrogenase/reductase	General_function_prediction_only_genes:	Pool,_multipurpose_conversions_of_intermed._met'm	-	-	YES	metagene_conserved_in_Bp_Bm_Bc	YES	0	0	0	0	0	0	0	0	0	0	0	0	0	0	0	0	0	0	0	0	0	0	0	0	0	0	0	0	0	0	0	0	0	0
BPSS1278	1745502	1746800	-	0.754	432	-	0	oxidoreductase	Coenzyme_transport_and_metabolism_genes:	Not_classified_(included_putative_assignments)	-	-	YES	-	-	0	0	0	0	0	0	0	0	0	0	0	0	0	0	0	0	0	0	0	0	0	0	0	0	0	0	0	0	0	0	0	0	0	0
BPSS1292	1770212	1771507	+	0.752	431	-	0	amino_acid_permease	Amino_acid_transport_and_metabolism_genes:	Amino_acids_and_amines	-	-	-	metagene_conserved_in_Bp_Bm_Bc	-	0	0	0	0	0	0	0	0	0	0	0	0	0	0	0	0	0	0	0	0	0	0	0	0	0	0	0	0	0	0	0	0	0	0
BPSS1293	1771895	1772497	+	0.7	200	-	0	lipoprotein	Not_in_COGs_genes:	Periplasmic/exported/lipoproteins	-	Positive_selection;Sanger_gene_slightly_longer	YES	-	-	0	0	0	0	0	0	0	0	0	0	0	0	0	0	0	0	0	0	0	0	0	0	0	0	0	0	0	0	0	0	0	0	0	0
BPSS1294	1772610	1773047	-	0.655	145	-	0	hypothetical_protein	Function_unknown_genes:	Not_classified_(included_putative_assignments)	-	-	YES	-	-	0	0	0	0	0	0	0	0	0	0	0	0	0	0	0	0	0	0	0	0	0	0	0	0	0	0	0	0	0	0	0	0	0	0
BPSS1297	1776176	1777645	-	0.703	489	-	0	regulatory_protein	Signal_transduction_mechanisms_genes:	Others	-	-	YES	-	-	0	0	0	0	0	0	0	0	0	0	0	0	0	0	0	0	0	0	0	0	0	0	0	0	0	0	0	0	0	0	0	0	0	0
BPSS1301	1781580	1782173	+	0.692	197	pcaG	0	protocatechuate_3,4-dioxygenase_alpha_chain	Secondary_metabolites_biosynthesis,_transport_and_catabolism_genes:	Detoxification	-	-	YES	metagene_conserved_in_Bp_Bm_Bc	-	0	0	0	0	0	0	0	0	0	0	0	0	0	0	0	0	0	0	0	0	0	0	0	0	0	0	0	0	0	0	0	0	0	0
BPSS1311A	1796638	1796973	+	0.798	111	-	0	hypothetical_protein	Not_in_COGs_genes:	Inner_membrane	-	-	YES	metagene_conserved_in_Bp_Bm_Bc	-	0	0	0	0	0	0	0	0	0	0	0	0	0	0	0	0	0	0	0	0	0	0	0	0	0	0	0	0	0	0	0	0	0	0
BPSS1318	1805789	1807282	-	0.72	497	-	0	D-lactate_dehydrogenase	Energy_production_and_conversion_genes:	Glycolysis	-	Positive_selection;-	YES	-	-	0	0	0	0	0	0	0	0	0	0	0	0	0	0	0	0	0	0	0	0	0	0	0	0	0	0	0	0	0	0	0	0	0	0
BPSS1321	1808641	1809741	-	0.662	366	-	0	hypothetical_protein	General_function_prediction_only_genes:	Unknown_function,_no_known_homologs	-	-	YES	-	-	0	0	0	0	0	0	0	0	0	0	0	0	0	0	0	0	0	0	0	0	0	0	0	0	0	0	0	0	0	0	0	0	0	0
BPSS1324	1812770	1813786	-	0.674	338	-	0	D-cysteine_desulfhydrase	Amino_acid_transport_and_metabolism_genes:	Carbon_compounds	-	-	YES	metagene_conserved_in_Bp_Bm_Bc	-	0	0	0	0	0	0	0	0	0	0	0	0	0	0	0	0	0	0	0	0	0	0	0	0	0	0	0	0	0	0	0	0	0	0
BPSS1387	1899336	1899821	-	0.597	161	-	0	hypothetical_protein	Translation_genes:	Conserved_in_other_organisms	-	-	YES	-	-	0	0	0	0	0	0	0	0	0	0	0	0	0	0	0	0	0	0	0	0	0	0	0	0	0	0	0	0	0	0	0	0	0	0
BPSS1388	1899846	1901654	-	0.636	602	-	0	hypothetical_protein	Cell_motility_genes:	Inner_membrane	-	-	YES	-	-	0	0	0	0	0	0	0	0	0	0	0	0	0	0	0	0	0	0	0	0	0	0	0	0	0	0	0	0	0	0	0	0	0	0
BPSS1390	1903732	1905498	-	0.621	588	sctC	0	type_III_secretion_system_protein	Intracellular_trafficking_and_secretion_genes:	Cell_killing	-	-	YES	-	-	0	0	0	0	0	0	0	0	0	0	0	0	0	0	0	0	0	0	0	0	0	0	0	0	0	0	0	0	0	0	0	0	0	0
BPSS1391	1905540	1906991	-	0.609	483	rtsA	0	AraC_family_regulator_of_pathogenicity_genes	Transcription_genes:	AraC-family	-	-	YES	-	-	0	0	0	0	0	0	0	0	0	0	0	0	0	0	0	0	0	0	0	0	0	0	0	0	0	0	0	0	0	0	0	0	0	0
BPSS1392	1907166	1907984	-	0.619	272	sctT	0	type_III_secretion-associated_protein	Intracellular_trafficking_and_secretion_genes:	Cell_killing	-	-	YES	-	-	0	0	0	0	0	0	0	0	0	0	0	0	0	0	0	0	0	0	0	0	0	0	0	0	0	0	0	0	0	0	0	0	0	0
BPSS1393	1907981	1908487	-	0.655	168	sctO	0	hypothetical_protein	Not_in_COGs_genes:	Unknown_function,_no_known_homologs	-	-	-	-	-	0	0	0	0	0	0	0	0	0	0	0	0	0	0	0	0	0	0	0	0	0	0	0	0	0	0	0	0	0	0	0	0	0	0
BPSS1394	1908508	1909857	-	0.665	449	sctN	0	type_III_secretion_system_ATPase	Intracellular_trafficking_and_secretion_genes:	Cell_killing	BPSS1394;BPSS1627	Positive_selection;Sanger_gene_slightly_longer	YES	-	-	0	0	0	0	0	0	0	0	0	0	0	0	0	0	0	0	0	0	0	0	0	0	0	0	0	0	0	0	0	0	0	0	0	0
BPSS1395	1909854	1910723	-	0.659	289	sctL	0	type_III_secretion_protein	Intracellular_trafficking_and_secretion_genes:	Cell_killing	-	-	YES	-	-	0	0	0	0	0	0	0	0	0	0	0	0	0	0	0	0	0	0	0	0	0	0	0	0	0	0	0	0	0	0	0	0	0	0
BPSS1396	1910708	1911475	-	0.671	255	sctK	0	hypothetical_protein	Not_in_COGs_genes:	Unknown_function,_no_known_homologs	-	-	YES	-	-	0	0	0	0	0	0	0	0	0	0	0	0	0	0	0	0	0	0	0	0	0	0	0	0	0	0	0	0	0	0	0	0	0	0
BPSS1397	1911490	1912314	-	0.626	274	sctJ	0	type_III_secretion_associated_protein	Intracellular_trafficking_and_secretion_genes:	Cell_killing	-	-	YES	-	-	0	0	0	0	0	0	0	0	0	0	0	0	0	0	0	0	0	0	0	0	0	0	0	0	0	0	0	0	0	0	0	0	0	0
BPSS1398	1912352	1912738	-	0.61	128	sctI	0	hypothetical_protein	Not_in_COGs_genes:	Unknown_function,_no_known_homologs	-	-	YES	-	-	0	0	0	0	0	0	0	0	0	0	0	0	0	0	0	0	0	0	0	0	0	0	0	0	0	0	0	0	0	0	0	0	0	0
BPSS1399	1912775	1913344	-	0.623	189	sctG	0	hypothetical_protein	General_function_prediction_only_genes:	Unknown_function,_no_known_homologs	-	-	YES	-	-	0	0	0	0	0	0	0	0	0	0	0	0	0	0	0	0	0	0	0	0	0	0	0	0	0	0	0	0	0	0	0	0	0	0
BPSS1400	1913631	1914689	+	0.629	352	sctU	0	type_III_secretion_protein	Intracellular_trafficking_and_secretion_genes:	Cell_killing	-	-	YES	-	-	0	0	0	0	0	0	0	0	0	0	0	0	0	0	0	0	0	0	0	0	0	0	0	0	0	0	0	0	0	0	0	0	0	0
BPSS1401	1914705	1916822	+	0.64	705	sctV	0	type_III_secretion-associated_protein	Intracellular_trafficking_and_secretion_genes:	Cell_killing	-	-	-	-	-	0	0	0	0	0	0	0	0	0	0	0	0	0	0	0	0	0	0	0	0	0	0	0	0	0	0	0	0	0	0	0	0	0	0
BPSS1402	1916819	1917505	+	0.651	228	-	0	hypothetical_protein	Not_in_COGs_genes:	Not_classified_(included_putative_assignments)	-	-	YES	-	-	0	0	0	0	0	0	0	0	0	0	0	0	0	0	0	0	0	0	0	0	0	0	0	0	0	0	0	0	0	0	0	0	0	0
BPSS1403	1917874	1918806	+	0.65	310	sctQ	0	type_III_secretion-associated_protein	Intracellular_trafficking_and_secretion_genes:	Cell_killing	-	Positive_selection;Sanger_gene_shorter	YES	-	-	0	0	0	0	0	0	0	0	0	0	0	0	0	0	0	0	0	0	0	0	0	0	0	0	0	0	0	0	0	0	0	0	0	0
BPSS1411	1923507	1924622	+	0.64	371	-	0	hypothetical_protein	Not_in_COGs_genes:	Unknown_function,_no_known_homologs	-	-	YES	-	-	0	0	0	0	0	0	0	0	0	0	0	0	0	0	0	0	0	0	0	0	0	0	0	0	0	0	0	0	0	0	0	0	0	0
BPSS1424	1938234	1939232	-	0.709	332	-	0	AraC_transcriptional_regulatory_protein	Transcription_genes:	AraC-family	-	-	YES	-	-	0	0	0	0	0	0	0	0	0	0	0	0	0	0	0	0	0	0	0	0	0	0	0	0	0	0	0	0	0	0	0	0	0	0
BPSS1450	1976503	1978822	+	0.639	-	-	0	Similar_to_Alcaligenes_eutrophus_nitric_oxide_reductase_NorZ_SWALL:O30375_(EMBL:AF002661)_(762_aa)_fasta_scores:_E():_2.7e-60,_35%_id_in_757_aa,_and_to_Alcaligenes_eutrophus_nitric_oxide_reductase_SWALL:O30368_(EMBL:AF002217)_(762_aa)_fasta_scores:_E():_6.7e-52,_34.93%_id_in_770_aa._CDS_contains_a_frameshift_mutation_after_codon_222	Not_in_COGs_genes:	other	-	-	-	-	-	0	0	0	0	0	0	0	0	0	0	0	0	0	0	0	0	0	0	0	0	0	0	0	0	0	0	0	0	0	0	0	0	0	0
BPSS1452	1978963	1980426	+	0.683	487	-	0	copper_nitrite_reductase_protein	Secondary_metabolites_biosynthesis,_transport_and_catabolism_genes:	Anaerobic_respiration	-	-	YES	-	-	0	0	0	0	0	0	0	0	0	0	0	0	0	0	0	0	0	0	0	0	0	0	0	0	0	0	0	0	0	0	0	0	0	0
BPSS1478b	2019875	2020045	-	0.593	-	-	0	Probable_gene_remnant._Similar_to_the_C-terminal_region_of_Burkholderia_cepacia_transposase_SWALL:Q45111_(EMBL:U44828)_(419_aa)_fasta_scores:_E():_6.1e-09,_78.26%_id_in_46_aa,_and_to_Ralstonia_solanacearum_ISRso7-transposase_protein_TISRso7_SWALL:Q8XEN1_(EMBL:AL646078)_(416_aa)_fasta_scores:_E():_0.00036,_54.34%_id_in_46_aa	Not_in_COGs_genes:	Transposon-related_functions	-	-	YES	-	-	0	0	0	0	0	0	0	0	0	0	0	0	0	0	0	0	0	0	0	0	0	0	0	0	0	0	0	0	0	0	0	0	0	0
BPSS1489	2029555	2030169	+	0.693	204	-	0	hypothetical_protein	General_function_prediction_only_genes:	Periplasmic/exported/lipoproteins	-	-	YES	-	-	0	0	0	0	0	0	0	0	0	0	0	0	0	0	0	0	0	0	0	0	0	0	0	0	0	0	0	0	0	0	0	0	0	0
BPSS1503	2049856	2052879	+	0.693	1007	tssI-5	0	hypothetical_protein	Function_unknown_genes:	Other_Transport/binding_proteins	-	Positive_selection;-	YES	-	-	0	0	0	0	0	0	0	0	0	0	0	0	0	0	0	0	0	0	0	0	0	0	0	0	0	0	0	0	0	0	0	0	0	0
BPSS1505	2055565	2056629	+	0.727	354	tagB-5	0	hypothetical_protein	Function_unknown_genes:	Other_Transport/binding_proteins	-	-	YES	-	-	0	0	0	0	0	0	0	0	0	0	0	0	0	0	0	0	0	0	0	0	0	0	0	0	0	0	0	0	0	0	0	0	0	0
BPSS1506	2056626	2057378	+	0.784	250	tagC-5	0	hypothetical_protein	Not_in_COGs_genes:	Other_Transport/binding_proteins	-	-	YES	-	-	0	0	0	0	0	0	0	0	0	0	0	0	0	0	0	0	0	0	0	0	0	0	0	0	0	0	0	0	0	0	0	0	0	0
BPSS1507	2057407	2057799	+	0.674	130	tagD-5	0	hypothetical_protein	Not_in_COGs_genes:	Other_Transport/binding_proteins	-	-	YES	-	-	0	0	0	0	0	0	0	0	0	0	0	0	0	0	0	0	0	0	0	0	0	0	0	0	0	0	0	0	0	0	0	0	0	0
BPSS1508	2057929	2058606	+	0.735	225	tssJ-5	0	hypothetical_protein	Function_unknown_genes:	Other_Transport/binding_proteins	-	-	YES	-	-	0	0	0	0	0	0	0	0	0	0	0	0	0	0	0	0	0	0	0	0	0	0	0	0	0	0	0	0	0	0	0	0	0	0
BPSS1509	2058639	2060036	+	0.72	465	tssK-5	0	hypothetical_protein	Function_unknown_genes:	Other_Transport/binding_proteins	-	-	YES	-	-	0	0	0	0	0	0	0	0	0	0	0	0	0	0	0	0	0	0	0	0	0	0	0	0	0	0	0	0	0	0	0	0	0	0
BPSS1510	2060051	2060698	+	0.732	215	tssL-5	0	hypothetical_protein	Function_unknown_genes:	Other_Transport/binding_proteins	-	-	YES	-	-	0	0	0	0	0	0	0	0	0	0	0	0	0	0	0	0	0	0	0	0	0	0	0	0	0	0	0	0	0	0	0	0	0	0
BPSS1511	2060710	2064669	+	0.75	1319	tssM-5	0	hypothetical_protein	Function_unknown_genes:	Other_Transport/binding_proteins	-	-	-	-	-	0	0	0	0	0	0	0	0	0	0	0	0	0	0	0	0	0	0	0	0	0	0	0	0	0	0	0	0	0	0	0	0	0	0
BPSS1558	2114037	2115356	+	0.666	439	kgtP	0	alpha-ketoglutarate_permease	General_function_prediction_only_genes:	Carbohydrates,_organic_acids_and_alcohols	BPSS1558;BPSS0061	-	YES	-	-	0	0	0	0	0	0	0	0	0	0	0	0	0	0	0	0	0	0	0	0	0	0	0	0	0	0	0	0	0	0	0	0	0	0
BPSS1560	2116730	2117953	+	0.713	407	mdlB	0	L(+)-mandelate_dehydrogenase	Energy_production_and_conversion_genes:	Carbon_compounds	-	-	YES	metagene_conserved_in_Bp_Bm_Bc	YES	0	0	0	0	0	0	0	0	0	0	0	0	0	0	0	0	0	0	0	0	0	0	0	0	0	0	0	0	0	0	0	0	0	0
BPSS1568	2127907	2129514	+	0.7	535	-	0	probable_AMP-binding_rotein	Secondary_metabolites_biosynthesis,_transport_and_catabolism_genes:	Not_classified_(included_putative_assignments)	-	-	YES	-	-	0	0	0	0	0	0	0	0	0	0	0	0	0	0	0	0	0	0	0	0	0	0	0	0	0	0	0	0	0	0	0	0	0	0
BPSS1619	2193709	2194320	-	0.761	203	-	0	type_III_secretion_protein	Not_in_COGs_genes:	Pathogenicity_Islands/determinants	-	-	-	-	-	0	0	0	0	0	0	0	0	0	0	0	0	0	0	0	0	0	0	0	0	0	0	0	0	0	0	0	0	0	0	0	0	0	0
BPSS1621	2196386	2197468	-	0.693	360	sctU-(Bp2)	0	type_III_secretion_protein	Intracellular_trafficking_and_secretion_genes:	Pathogenicity_Islands/determinants	-	-	-	-	-	0	0	0	0	0	0	0	0	0	0	0	0	0	0	0	0	0	0	0	0	0	0	0	0	0	0	0	0	0	0	0	0	0	0
BPSS1628	2202263	2202790	+	0.769	175	sctO	0	type_III_secretion_protein	Not_in_COGs_genes:	Pathogenicity_Islands/determinants	-	-	YES	-	-	0	0	0	0	0	0	0	0	0	0	0	0	0	0	0	0	0	0	0	0	0	0	0	0	0	0	0	0	0	0	0	0	0	0
BPSS1629	2202787	2203818	+	0.664	343	sctT	0	type_III_secretion_protein	Intracellular_trafficking_and_secretion_genes:	Pathogenicity_Islands/determinants	-	-	YES	-	-	0	0	0	0	0	0	0	0	0	0	0	0	0	0	0	0	0	0	0	0	0	0	0	0	0	0	0	0	0	0	0	0	0	0
BPSS1630	2204186	2205952	+	0.71	588	sctP	0	hypothetical_protein	Replication,_recombination_and_repair_genes:	Unknown_function,_no_known_homologs	-	-	YES	-	-	0	0	0	0	0	0	0	0	0	0	0	0	0	0	0	0	0	0	0	0	0	0	0	0	0	0	0	0	0	0	0	0	0	0
BPSS1641	2259212	2259526	+	0.702	-	-	0	Partial_CDS._This_CDS_is_truncated_at_the_N-terminal_region_and_contains_an_in-frame_stop_codon._Similar_to_the_C-terminal_region_of_Ralstonia_solanacearum_hypothetical_transmembrane_protein_rsp1338_or_rs04763_or_rsp1307_or_rs05692_SWALL:Q8XGL9_(EMBL:AL646084)_(540_aa)_fasta_scores:_E():_1.5e-10,_47.05%_id_in_102_aa	Not_in_COGs_genes:	Conserved_in_other_organisms	-	-	YES	-	-	0	0	0	0	0	0	0	0	0	0	0	0	0	0	0	0	0	0	0	0	0	0	0	0	0	0	0	0	0	0	0	0	0	0
BPSS1643	2259622	2260542	-	0.684	306	-	0	LysR-family_transcriptional_regulator	Transcription_genes:	LysR-family	-	-	YES	metagene_conserved_in_Bp_Bm_Bc	-	0	0	0	0	0	0	0	0	0	0	0	0	0	0	0	0	0	0	0	0	0	0	0	0	0	0	0	0	0	0	0	0	0	0
BPSS1644	2260651	2262048	+	0.719	465	-	0	hypothetical_protein	General_function_prediction_only_genes:	Inner_membrane	-	-	YES	-	-	0	0	0	0	0	0	0	0	0	0	0	0	0	0	0	0	0	0	0	0	0	0	0	0	0	0	0	0	0	0	0	0	0	0
BPSS1645	2262045	2262443	+	0.669	132	-	0	hypothetical_protein	Function_unknown_genes:	Conserved_in_other_organisms	-	-	YES	-	-	0	0	0	0	0	0	0	0	0	0	0	0	0	0	0	0	0	0	0	0	0	0	0	0	0	0	0	0	0	0	0	0	0	0
BPSS1650	2269250	2269741	+	0.72	163	-	0	hypothetical_protein	Not_in_COGs_genes:	Periplasmic/exported/lipoproteins	-	-	YES	-	-	0	0	0	0	0	0	0	0	0	0	0	0	0	0	0	0	0	0	0	0	0	0	0	0	0	0	0	0	0	0	0	0	0	0
BPSS1714	2353354	2354328	+	0.736	324	-	0	AraC-family_transcriptional_regulator	Transcription_genes:	AraC-family	-	-	YES	metagene_conserved_in_Bp_Bm_Bc	-	0	0	0	0	0	0	0	0	0	0	0	0	0	0	0	0	0	0	0	0	0	0	0	0	0	0	0	0	0	0	0	0	0	0
BPSS1727	2368050	2370776	-	0.682	908	-	0	hemagglutinin_related_protein	Intracellular_trafficking_and_secretion_genes:	Cell_killing	-	Positive_selection;-	YES	-	-	0	0	0	0	0	0	0	0	0	0	0	0	0	0	0	0	0	0	0	0	0	0	0	0	0	0	0	0	0	0	0	0	0	0
BPSS1804	2463970	2465058	+	0.586	362	-	0	hypothetical_protein	Signal_transduction_mechanisms_genes:	Not_classified_(included_putative_assignments)	-	-	YES	-	-	0	0	0	0	0	0	0	0	0	0	0	0	0	0	0	0	0	0	0	0	0	0	0	0	0	0	0	0	0	0	0	0	0	0
BPSS1851	2514984	2516189	+	0.744	401	-	0	transport-related_membrane_protein	General_function_prediction_only_genes:	Other_Transport/binding_proteins	-	-	YES	-	-	0	0	0	0	0	0	0	0	0	0	0	0	0	0	0	0	0	0	0	0	0	0	0	0	0	0	0	0	0	0	0	0	0	0
BPSS1855	2520050	2520739	-	0.764	229	-	0	phosphoglycerate_mutase_family_protein	Carbohydrate_transport_and_metabolism_genes:	Not_classified_(included_putative_assignments)	-	-	YES	-	-	0	0	0	0	0	0	0	0	0	0	0	0	0	0	0	0	0	0	0	0	0	0	0	0	0	0	0	0	0	0	0	0	0	0
BPSS1858	2523398	2524324	+	0.721	308	-	0	LysR-family_transcriptional_regulator	Transcription_genes:	LysR-family	-	-	YES	metagene_conserved_in_Bp_Bm_Bc	-	0	0	0	0	0	0	0	0	0	0	0	0	0	0	0	0	0	0	0	0	0	0	0	0	0	0	0	0	0	0	0	0	0	0
BPSS1866A	2535679	2536092	-	0.703	137	-	0	hypothetical_protein	Transcription_genes:	Unknown_function,_no_known_homologs	-	-	YES	-	-	0	0	0	0	0	0	0	0	0	0	0	0	0	0	0	0	0	0	0	0	0	0	0	0	0	0	0	0	0	0	0	0	0	0
BPSS1876A	2550617	2550940	+	0.704	107	-	0	hypothetical_protein	Not_in_COGs_genes:	Periplasmic/exported/lipoproteins	-	-	-	-	-	0	0	0	0	0	0	0	0	0	0	0	0	0	0	0	0	0	0	0	0	0	0	0	0	0	0	0	0	0	0	0	0	0	0
BPSS1890	2565817	2566704	-	0.722	295	-	0	cat_operon_LysR-family_transcriptional_activator	Transcription_genes:	LysR-family	-	-	YES	-	-	0	0	0	0	0	0	0	0	0	0	0	0	0	0	0	0	0	0	0	0	0	0	0	0	0	0	0	0	0	0	0	0	0	0
BPSS1901	2578111	2579112	+	0.741	333	-	0	hypothetical_protein	Carbohydrate_transport_and_metabolism_genes:	Not_classified_(included_putative_assignments)	-	-	YES	-	-	0	0	0	0	0	0	0	0	0	0	0	0	0	0	0	0	0	0	0	0	0	0	0	0	0	0	0	0	0	0	0	0	0	0
BPSS1925	2606114	2607292	-	0.675	392	-	0	hypothetical_protein	Not_in_COGs_genes:	Unknown_function,_no_known_homologs	-	-	YES	-	-	0	0	0	0	0	0	0	0	0	0	0	0	0	0	0	0	0	0	0	0	0	0	0	0	0	0	0	0	0	0	0	0	0	0
BPSS1965	2655043	2655687	-	0.715	214	-	0	glutathione_S-transferase_protein	Posttranslational_modification,_protein_turnover,_chaperones_genes:	Thioredoxin,_glutaredoxin,_glutathione	-	-	YES	metagene_conserved_in_Bp_Bm_Bc	-	0	0	0	0	0	0	0	0	0	0	0	0	0	0	0	0	0	0	0	0	0	0	0	0	0	0	0	0	0	0	0	0	0	0
BPSS1975	2669668	2670951	+	0.675	427	-	0	hypothetical_protein	Posttranslational_modification,_protein_turnover,_chaperones_genes:	Inner_membrane	-	-	YES	metagene_conserved_in_Bp_Bm_Bc	-	0	0	0	0	0	0	0	0	0	0	0	0	0	0	0	0	0	0	0	0	0	0	0	0	0	0	0	0	0	0	0	0	0	0
BPSS1998	2702920	2705784	-	0.67	954	-	0	lipoprotein	Function_unknown_genes:	Periplasmic/exported/lipoproteins	-	-	YES	-	-	0	0	0	0	0	0	0	0	0	0	0	0	0	0	0	0	0	0	0	0	0	0	0	0	0	0	0	0	0	0	0	0	0	0
BPSS2002	2708924	2709692	-	0.567	-	-	0	Similar_to_Salmonella_typhimurium_glutamate/aspartate_periplasmic_binding_protein_precursor_gltI_SWALL:GLTI_SALTY_(SWALL:Q9ZF60)_(302_aa)_fasta_scores:_E():_2.4e-30,_42.92%_id_in_212_aa,_and_to_Chromobacterium_violaceum_ATCC_12472_probable_amino_acid_ABC_transporter,_periplasmic_amino_acid-binding_protein_SWALL:Q7P1U2_(EMBL:AE016910)_(302_aa)_fasta_scores:_E():_2.5e-32,_45.54%_id_in_213_aa._CDS_c…	Not_in_COGs_genes:	Amino_acids_and_amines	-	-	YES	-	-	0	0	0	0	0	0	0	0	0	0	0	0	0	0	0	0	0	0	0	0	0	0	0	0	0	0	0	0	0	0	0	0	0	0
BPSS2008	2713323	2713949	+	0.649	-	-	0	Similar_to_C-terminal_regions_of_Rhizobium_meliloti_transposase_for_insertion_sequence_element_ISRm3_SWALL:TRA3_RHIME_(SWALL:P80011)_(400_aa)_fasta_scores:_E():_2.8e-24,_49%_id_in_151_aa,_and_Ralstonia_solanacearum_ISRso7-transposase_protein_TISRso7_or_Rsp0478_or_Rs00356_or_Rsc0252_or_Rs00687_SWALL:Q8XEN1_(EMBL:AL646078)_(416_aa)_fasta_scores:_E():_3.7e-31,_54.81%_id_in_166_aa	Not_in_COGs_genes:	Transposon-related_functions	-	-	YES	-	-	0	0	0	0	0	0	0	0	0	0	0	0	0	0	0	0	0	0	0	0	0	0	0	0	0	0	0	0	0	0	0	0	0	0
BPSS2009	2714171	2715988	-	0.677	605	glmS3	0	glucosamine--fructose-6-phosphate_aminotransferase_[isomerizing]_3	Cell_wall/membrane_biogenesis_genes:	Pool,_multipurpose_conversions_of_intermed._met'm	BPSS2009;BPSL0312	-	-	-	-	0	0	0	0	0	0	0	0	0	0	0	0	0	0	0	0	0	0	0	0	0	0	0	0	0	0	0	0	0	0	0	0	0	0
BPSS2010	2715995	2717116	-	0.705	373	-	0	hypothetical_protein	Not_in_COGs_genes:	Unknown_function,_no_known_homologs	-	-	-	-	-	0	0	0	0	0	0	0	0	0	0	0	0	0	0	0	0	0	0	0	0	0	0	0	0	0	0	0	0	0	0	0	0	0	0
BPSS2011	2717209	2719323	-	0.643	704	-	0	outer_membrane_protein	Not_in_COGs_genes:	Outer_membrane_constituents	-	-	YES	-	-	0	0	0	0	0	0	0	0	0	0	0	0	0	0	0	0	0	0	0	0	0	0	0	0	0	0	0	0	0	0	0	0	0	0
BPSS2012	2719653	2720468	-	0.67	271	-	0	hypothetical_protein	Not_in_COGs_genes:	Inner_membrane	-	-	YES	-	-	0	0	0	0	0	0	0	0	0	0	0	0	0	0	0	0	0	0	0	0	0	0	0	0	0	0	0	0	0	0	0	0	0	0
BPSS2013	2720481	2721737	-	0.699	418	-	0	hypothetical_protein	Not_in_COGs_genes:	Periplasmic/exported/lipoproteins	-	-	YES	-	-	0	0	0	0	0	0	0	0	0	0	0	0	0	0	0	0	0	0	0	0	0	0	0	0	0	0	0	0	0	0	0	0	0	0
BPSS2014	2721751	2722743	-	0.742	330	-	0	hypothetical_protein	Cell_wall/membrane_biogenesis_genes:	Unknown_function,_no_known_homologs	-	-	YES	-	-	0	0	0	0	0	0	0	0	0	0	0	0	0	0	0	0	0	0	0	0	0	0	0	0	0	0	0	0	0	0	0	0	0	0
BPSS2015	2722747	2724309	-	0.701	520	-	0	inner_membrane_glycosyltransferase	Cell_wall/membrane_biogenesis_genes:	Inner_membrane	-	-	YES	-	-	0	0	0	0	0	0	0	0	0	0	0	0	0	0	0	0	0	0	0	0	0	0	0	0	0	0	0	0	0	0	0	0	0	0
BPSS2016	2725574	2726788	+	0.682	404	wecB	0	UDP-N-acetylglucosamine_2-epimerase	Cell_wall/membrane_biogenesis_genes:	Lipopolysaccharide	-	-	YES	-	-	0	0	0	0	0	0	0	0	0	0	0	0	0	0	0	0	0	0	0	0	0	0	0	0	0	0	0	0	0	0	0	0	0	0
BPSS2033	2746669	2747511	+	0.772	280	-	0	enoyl-CoA_hydratase/isomerase	Lipid_transport_and_metabolism_genes:	Not_classified_(included_putative_assignments)	-	-	YES	-	-	0	0	0	0	0	0	0	0	0	0	0	0	0	0	0	0	0	0	0	0	0	0	0	0	0	0	0	0	0	0	0	0	0	0
BPSS2034	2747508	2749520	+	0.729	670	-	0	acetyl-/propionyl-coenzyme_A_carboxylase_alpha_chain_protein	Lipid_transport_and_metabolism_genes:	Fatty_acid_and_phosphatidic_acid_biosynthesis	-	-	YES	-	-	0	0	0	0	0	0	0	0	0	0	0	0	0	0	0	0	0	0	0	0	0	0	0	0	0	0	0	0	0	0	0	0	0	0
BPSS2035	2749555	2750439	+	0.694	294	-	0	hypothetical_protein	Function_unknown_genes:	Conserved_in_other_organisms	-	-	YES	-	-	0	0	0	0	0	0	0	0	0	0	0	0	0	0	0	0	0	0	0	0	0	0	0	0	0	0	0	0	0	0	0	0	0	0
BPSS2062	2796704	2797141	-	0.539	145	-	GI_16	acetyltransferase_(GNAT)_family_protein	General_function_prediction_only_genes:	Not_classified_(included_putative_assignments)	-	-	-	-	-	0	0	0	0	0	0	0	0	0	0	0	0	0	0	0	0	0	0	0	0	0	0	0	0	0	0	0	0	0	0	0	0	0	0
BPSS2063	2797101	2797703	-	0.595	200	-	GI_16	hypothetical_protein	Replication,_recombination_and_repair_genes:	Unknown_function,_no_known_homologs	-	-	-	-	-	0	0	0	0	0	0	0	0	0	0	0	0	0	0	0	0	0	0	0	0	0	0	0	0	0	0	0	0	0	0	0	0	0	0
BPSS2064	2798378	2799457	-	0.577	359	-	GI_16	porin_protein	Cell_wall/membrane_biogenesis_genes:	Outer_membrane_constituents	BPSS2064;BPSL1029	-	-	-	-	0	0	0	0	0	0	0	0	0	0	0	0	0	0	0	0	0	0	0	0	0	0	0	0	0	0	0	0	0	0	0	0	0	0
BPSS2066	2801509	2802693	-	0.594	394	-	GI_16	hypothetical_protein	General_function_prediction_only_genes:	Not_classified_(included_putative_assignments)	-	-	-	-	-	0	0	0	0	0	0	0	0	0	0	0	0	0	0	0	0	0	0	0	0	0	0	0	0	0	0	0	0	0	0	0	0	0	0
BPSS2083	2819356	2820309	-	0.549	317	-	GI_16	ABC_transporter,_permease_protein	Carbohydrate_transport_and_metabolism_genes:	Transport/binding_proteins	-	-	-	-	-	0	0	0	0	0	0	0	0	0	0	0	0	0	0	0	0	0	0	0	0	0	0	0	0	0	0	0	0	0	0	0	0	0	0
BPSS2090	2829283	2829711	-	0.627	142	-	GI_16	DNA-binding_protein	Replication,_recombination_and_repair_genes:	Not_classified_(included_putative_assignments)	-	-	-	-	-	0	0	0	0	0	0	0	0	0	0	0	0	0	0	0	0	0	0	0	0	0	0	0	0	0	0	0	0	0	0	0	0	0	0
BPSS2112	2860727	2861282	+	0.716	-	-	0	Similar_to_Bordetella_pertussis_hypothetical_protein_SWALL:Q7VZD6_(EMBL:BX640413)_(190_aa)_fasta_scores:_E():_4e-18,_39.22%_id_in_181_aa,_and_to_Bordetella_parapertussis_hypothetical_protein_SWALL:Q7WAC9_(EMBL:BX640427)_(190_aa)_fasta_scores:_E():_4e-18,_39.22%_id_in_181_aa._CDS_contains_frameshifts_after_codons_9_and_92	Not_in_COGs_genes:	Menaquinone,_ubiquinone	-	-	-	-	-	0	0	0	0	0	0	0	0	0	0	0	0	0	0	0	0	0	0	0	0	0	0	0	0	0	0	0	0	0	0	0	0	0	0
BPSS2114	2861989	2862693	-	0.708	234	-	0	oxidoreductase/short-chain_dehydrogenase_protein	General_function_prediction_only_genes:	Pool,_multipurpose_conversions_of_intermed._met'm	-	-	YES	metagene_conserved_in_Bp_Bm_Bc	-	0	0	0	0	0	0	0	0	0	0	0	0	0	0	0	0	0	0	0	0	0	0	0	0	0	0	0	0	0	0	0	0	0	0
BPSS2115	2862875	2863789	+	0.724	304	-	0	LysR_family_transcriptional_regulator	Transcription_genes:	LysR-family	-	Positive_selection;-	YES	metagene_conserved_in_Bp_Bm_Bc	-	0	0	0	0	0	0	0	0	0	0	0	0	0	0	0	0	0	0	0	0	0	0	0	0	0	0	0	0	0	0	0	0	0	0
BPSS2116	2864045	2865382	-	0.726	445	dsdA	0	D-serine_dehydratase	Amino_acid_transport_and_metabolism_genes:	Amino_acids	-	-	YES	-	-	0	0	0	0	0	0	0	0	0	0	0	0	0	0	0	0	0	0	0	0	0	0	0	0	0	0	0	0	0	0	0	0	0	0
BPSS2122	2871821	2872219	-	0.627	132	-	0	hypothetical_protein	Transcription_genes:	Unknown_function,_no_known_homologs	-	-	-	-	-	0	0	0	0	0	0	0	0	0	0	0	0	0	0	0	0	0	0	0	0	0	0	0	0	0	0	0	0	0	0	0	0	0	0
BPSS2149	2908478	2909989	-	0.734	503	-	0	MmgE/Prp_family_protein	General_function_prediction_only_genes:	Not_classified_(included_putative_assignments)	-	-	-	-	-	0	0	0	0	0	0	0	0	0	0	0	0	0	0	0	0	0	0	0	0	0	0	0	0	0	0	0	0	0	0	0	0	0	0
BPSS2150	2909986	2910858	-	0.702	290	-	0	citrate_lyase	Carbohydrate_transport_and_metabolism_genes:	TCA_cycle	-	-	-	-	-	0	0	0	0	0	0	0	0	0	0	0	0	0	0	0	0	0	0	0	0	0	0	0	0	0	0	0	0	0	0	0	0	0	0
BPSS2151	2910855	2912156	-	0.729	433	-	0	Acyl-CoA_transferase/carnitine_dehydratase_protein	Energy_production_and_conversion_genes:	Not_classified_(included_putative_assignments)	-	-	-	-	-	0	0	0	0	0	0	0	0	0	0	0	0	0	0	0	0	0	0	0	0	0	0	0	0	0	0	0	0	0	0	0	0	0	0
BPSS2152	2912215	2913381	-	0.665	388	-	0	zinc-binding_dehydrogenase	General_function_prediction_only_genes:	Not_classified_(included_putative_assignments)	-	-	-	-	-	0	0	0	0	0	0	0	0	0	0	0	0	0	0	0	0	0	0	0	0	0	0	0	0	0	0	0	0	0	0	0	0	0	0
BPSS2154	2914055	2915485	-	0.721	476	-	0	MFS_family_transporter	General_function_prediction_only_genes:	Transport/binding_proteins	-	-	-	-	-	0	0	0	0	0	0	0	0	0	0	0	0	0	0	0	0	0	0	0	0	0	0	0	0	0	0	0	0	0	0	0	0	0	0
BPSS2155	2916019	2917482	-	0.697	487	-	0	MFS_family_transporter	General_function_prediction_only_genes:	Transport/binding_proteins	-	-	-	-	-	0	0	0	0	0	0	0	0	0	0	0	0	0	0	0	0	0	0	0	0	0	0	0	0	0	0	0	0	0	0	0	0	0	0
BPSS2159	2920989	2921894	+	0.736	301	-	0	citrate_lyase_beta_chain	Carbohydrate_transport_and_metabolism_genes:	TCA_cycle	-	-	YES	-	-	0	0	0	0	0	0	0	0	0	0	0	0	0	0	0	0	0	0	0	0	0	0	0	0	0	0	0	0	0	0	0	0	0	0
BPSS2160	2922210	2923289	+	0.694	359	-	0	outer_membrane_porin_protein	Cell_wall/membrane_biogenesis_genes:	Outer_membrane_constituents	-	-	YES	-	-	0	0	0	0	0	0	0	0	0	0	0	0	0	0	0	0	0	0	0	0	0	0	0	0	0	0	0	0	0	0	0	0	0	0
BPSS2161	2923331	2924806	+	0.716	491	-	0	MmgE/PrpD_family_protein	General_function_prediction_only_genes:	Not_classified_(included_putative_assignments)	-	-	YES	-	-	0	0	0	0	0	0	0	0	0	0	0	0	0	0	0	0	0	0	0	0	0	0	0	0	0	0	0	0	0	0	0	0	0	0
BPSS2186	2953617	2953835	+	0.635	72	-	0	pilus_subunit_protein	Not_in_COGs_genes:	Outer_membrane_constituents	-	-	YES	-	-	0	0	0	0	0	0	0	0	0	0	0	0	0	0	0	0	0	0	0	0	0	0	0	0	0	0	0	0	0	0	0	0	0	0
BPSS2187	2953927	2954466	+	0.748	179	-	0	pilus_assembly-related_outer_membrane_protein	Posttranslational_modification,_protein_turnover,_chaperones_genes:	Outer_membrane_constituents	-	-	YES	-	-	0	0	0	0	0	0	0	0	0	0	0	0	0	0	0	0	0	0	0	0	0	0	0	0	0	0	0	0	0	0	0	0	0	0
BPSS2188	2954506	2955888	+	0.712	460	-	0	hypothetical_protein	Posttranslational_modification,_protein_turnover,_chaperones_genes:	Conserved_in_other_organisms	-	-	YES	-	-	0	0	0	0	0	0	0	0	0	0	0	0	0	0	0	0	0	0	0	0	0	0	0	0	0	0	0	0	0	0	0	0	0	0
BPSS2189	2955934	2956779	+	0.716	281	-	0	pilus_assembly-related,_exported_protein	Intracellular_trafficking_and_secretion_genes:	Periplasmic/exported/lipoproteins	-	-	YES	-	-	0	0	0	0	0	0	0	0	0	0	0	0	0	0	0	0	0	0	0	0	0	0	0	0	0	0	0	0	0	0	0	0	0	0
BPSS2190	2956893	2958965	+	0.748	690	-	0	outer_membrane_protein	Intracellular_trafficking_and_secretion_genes:	Outer_membrane_constituents	-	-	-	-	-	0	0	0	0	0	0	0	0	0	0	0	0	0	0	0	0	0	0	0	0	0	0	0	0	0	0	0	0	0	0	0	0	0	0
BPSS2191	2958987	2959292	+	0.712	101	-	0	lipoprotein	Not_in_COGs_genes:	Periplasmic/exported/lipoproteins	-	-	YES	-	-	0	0	0	0	0	0	0	0	0	0	0	0	0	0	0	0	0	0	0	0	0	0	0	0	0	0	0	0	0	0	0	0	0	0
BPSS2195	2961620	2962828	+	0.711	402	-	0	pilus_assembly-related_protein	Intracellular_trafficking_and_secretion_genes:	Outer_membrane_constituents	-	-	YES	-	-	0	0	0	0	0	0	0	0	0	0	0	0	0	0	0	0	0	0	0	0	0	0	0	0	0	0	0	0	0	0	0	0	0	0
BPSS2197	2964244	2965221	+	0.677	325	-	0	hypothetical_protein	Intracellular_trafficking_and_secretion_genes:	Outer_membrane_constituents	-	-	YES	-	-	0	0	0	0	0	0	0	0	0	0	0	0	0	0	0	0	0	0	0	0	0	0	0	0	0	0	0	0	0	0	0	0	0	0
BPSS2198	2965276	2966235	+	0.7	319	-	0	hypothetical_protein	Intracellular_trafficking_and_secretion_genes:	Outer_membrane_constituents	-	-	YES	-	-	0	0	0	0	0	0	0	0	0	0	0	0	0	0	0	0	0	0	0	0	0	0	0	0	0	0	0	0	0	0	0	0	0	0
BPSS2200	2967370	2968587	+	0.705	405	tyrB2	0	aspartate_aminotransferase	Amino_acid_transport_and_metabolism_genes:	amino_acids	-	-	YES	-	-	0	0	0	0	0	0	0	0	0	0	0	0	0	0	0	0	0	0	0	0	0	0	0	0	0	0	0	0	0	0	0	0	0	0
BPSS2201	2968811	2969203	+	0.728	130	-	0	hypothetical_protein	Translation_genes:	Not_classified_(included_putative_assignments)	-	-	-	-	-	0	0	0	0	0	0	0	0	0	0	0	0	0	0	0	0	0	0	0	0	0	0	0	0	0	0	0	0	0	0	0	0	0	0
BPSS2202	2969371	2970444	+	0.699	357	-	0	porin_related,_membrane_protein	Cell_wall/membrane_biogenesis_genes:	Inner_membrane	-	-	YES	-	-	0	0	0	0	0	0	0	0	0	0	0	0	0	0	0	0	0	0	0	0	0	0	0	0	0	0	0	0	0	0	0	0	0	0
BPSS2203	2970524	2971954	+	0.683	476	-	0	amino_acid_transport,_membrane_protein	Amino_acid_transport_and_metabolism_genes:	Amino_acids_and_amines	BPSS2203;BPSL0900	-	YES	-	-	0	0	0	0	0	0	0	0	0	0	0	0	0	0	0	0	0	0	0	0	0	0	0	0	0	0	0	0	0	0	0	0	0	0
BPSS2269	3048340	3049497	-	0.703	385	-	0	transcriptional_regulator	Energy_production_and_conversion_genes:	Others	-	-	YES	-	-	0	0	0	0	0	0	0	0	0	0	0	0	0	0	0	0	0	0	0	0	0	0	0	0	0	0	0	0	0	0	0	0	0	0
BPSS2274	3056541	3056981	+	0.642	146	-	0	hypothetical_protein	Not_in_COGs_genes:	Not_classified_(included_putative_assignments)	-	-	YES	-	-	0	0	0	0	0	0	0	0	0	0	0	0	0	0	0	0	0	0	0	0	0	0	0	0	0	0	0	0	0	0	0	0	0	0
BPSS2277	3059829	3060260	+	0.708	143	-	0	hypothetical_protein	Not_in_COGs_genes:	Unknown_function,_no_known_homologs	-	-	-	-	-	0	0	0	0	0	0	0	0	0	0	0	0	0	0	0	0	0	0	0	0	0	0	0	0	0	0	0	0	0	0	0	0	0	0
BPSS2289	3078195	3079322	-	0.692	375	-	0	porin_protein	Cell_wall/membrane_biogenesis_genes:	Outer_membrane_constituents	-	-	-	-	-	0	0	0	0	0	0	0	0	0	0	0	0	0	0	0	0	0	0	0	0	0	0	0	0	0	0	0	0	0	0	0	0	0	0
BPSS2290	3079402	3081207	-	0.697	601	-	0	AMP-binding_enzyme	Secondary_metabolites_biosynthesis,_transport_and_catabolism_genes:	Not_classified_(included_putative_assignments)	-	-	-	-	-	0	0	0	0	0	0	0	0	0	0	0	0	0	0	0	0	0	0	0	0	0	0	0	0	0	0	0	0	0	0	0	0	0	0
BPSS2292	3084437	3085498	+	0.749	353	-	0	hypothetical_protein	Signal_transduction_mechanisms_genes:	Unknown_function,_no_known_homologs	-	-	-	-	-	0	0	0	0	0	0	0	0	0	0	0	0	0	0	0	0	0	0	0	0	0	0	0	0	0	0	0	0	0	0	0	0	0	0
BPSS2297	3090067	3090663	+	0.727	198	-	0	hypothetical_protein	General_function_prediction_only_genes:	Not_classified_(included_putative_assignments)	-	-	-	-	-	0	0	0	0	0	0	0	0	0	0	0	0	0	0	0	0	0	0	0	0	0	0	0	0	0	0	0	0	0	0	0	0	0	0
BPSS2298	3090660	3091382	+	0.71	240	-	0	hypothetical_protein	Secondary_metabolites_biosynthesis,_transport_and_catabolism_genes:	Not_classified_(included_putative_assignments)	-	-	-	-	-	0	0	0	0	0	0	0	0	0	0	0	0	0	0	0	0	0	0	0	0	0	0	0	0	0	0	0	0	0	0	0	0	0	0
BPSS2333	3148295	3149641	-	0.699	448	-	0	hypothetical_protein	Coenzyme_transport_and_metabolism_genes:	Not_classified_(included_putative_assignments)	-	-	YES	metagene_conserved_in_Bp_Bm_Bc	-	0	0	0	0	0	0	0	0	0	0	0	0	0	0	0	0	0	0	0	0	0	0	0	0	0	0	0	0	0	0	0	0	0	0
BPSS2334	3149638	3150708	-	0.721	356	-	0	hypothetical_protein	Not_in_COGs_genes:	Not_classified_(included_putative_assignments)	-	-	YES	metagene_conserved_in_Bp_Bm_Bc	-	0	0	0	0	0	0	0	0	0	0	0	0	0	0	0	0	0	0	0	0	0	0	0	0	0	0	0	0	0	0	0	0	0	0
BPSS2335	3150721	3151443	-	0.656	240	glnQ	0	glutamine_ABC_transporter_ATP-binding_component	Amino_acid_transport_and_metabolism_genes:	Amino_acids_and_amines	-	-	YES	-	-	0	0	0	0	0	0	0	0	0	0	0	0	0	0	0	0	0	0	0	0	0	0	0	0	0	0	0	0	0	0	0	0	0	0
BPSS2336	3151446	3152102	-	0.645	218	glnP	0	glutamine_ABC_transporter_permease_component	Amino_acid_transport_and_metabolism_genes:	Amino_acids_and_amines	-	-	-	metagene_conserved_in_Bp_Bm_Bc	-	0	0	0	0	0	0	0	0	0	0	0	0	0	0	0	0	0	0	0	0	0	0	0	0	0	0	0	0	0	0	0	0	0	0
BPSS2337	3152167	3152919	-	0.64	250	glnH	0	glutamine_ABC_transporter_periplasmic-binding_protein	Amino_acid_transport_and_metabolism_genes:	Amino_acids_and_amines	-	-	YES	metagene_conserved_in_Bp_Bm_Bc	-	0	0	0	0	0	0	0	0	0	0	0	0	0	0	0	0	0	0	0	0	0	0	0	0	0	0	0	0	0	0	0	0	0	0
REFERENCE
^	Holden MT, Titball RW, Peacock SJ, Cerdeno-Tarraga AM, Atkins T, et al. (2004) Genomic plasticity of the causative agent of melioidosis, Burkholderia pseudomallei. Proc Natl Acad Sci U S A 101: 14240-14245.
*	Nandi T, Ong C, Singh AP, Boddey J, Atkins T, et al. (2010) A genomic survey of positive selection in Burkholderia pseudomallei provides insights into the evolution of accidental virulence. PLoS Pathog 6: e1000845.
#	Lin CH, Bourque G, Tan P (2008) A comparative synteny map of Burkholderia species links large-scale genome rearrangements to fine-scale nucleotide variation in prokaryotes. Mol Biol Evol 25: 549-558
[truncated: 49 more columns]

## Sheet: (B) Functional classification
(B) Functional classification of genes without detectible expression.
Functional classification (No. of Sanger genes)		Bp Chr	No. of Sanger genes not expressed (Sanger GeneIDs)
Type III Secretion Systems
TTSS1 (20 genes)	Plant infection	Chr2	12 genes BPSS1390-BPSL1403
TTSS2 (19 genes)	Plant infection	Chr2	5 genes BPSS1619,BPSS1621,BPSS1628-BPSS1630
Type VI Secretion Systems
T6SS2 (21 genes)		Chr2	7 genes BPSS0095,BPSS0100,BPSS0102,BPSS0104,BPSS0109,BPSS0110,BPSS0115
T6SS5 (19 genes)	Virulence	Chr2	8 genes BPSS1503,BPSS1505-BPSS1511
Capsule
CPS IV (17 genes)		Chr1	9 genes BPSL2770,BPSL2771,BPSL2773-BPSL2779
Pili/Fimbriae
tad-type pili cluster (4 genes)		Chr1	2 genes BPSL3170,BPSL3173
pilC		Chr1	BPSL3009
tad-type pili cluster (14 genes)		Chr2	9 genes BPSS2186-BPSS2191,BPSS2195,BPSS2197,BPSS2198
Type I (4 genes)		Chr2	BPSS0094
Type I (2 genes)		Chr2	BPSS0121
Adhesins
Hep-Hag repeat family proteins (7 genes)		Chr1	2 genes BPSL1705,BPSL2063
		Chr2	BPSS1727
Genomic Islands
GI3 (46 genes)	putative prophage	Chr1	3 genes BPSL0550,BPSL0551,BPSL0560
GI5 (10 genes)	plasmid-like	Chr1	BPSL0949
GI6 (22 genes)	prophage-like	Chr1	13 genes BPSL1139-BPSL1144,BPSL1146-BPSL1148,BPSL1150,BPSL1151,BPSL1154,BPSL1155
GI8 (73 genes)	contains hemolysin protein	Chr1	31 genes BPSL1656, BPSL1662, BPSL1667-1670, BPSL1674-1682, BPSL1688-1690, BPSL1693, BPSL1697, BPSL1699-1700, BPSL1702-1706
GI11 (14 genes)	putative integrated plasmid	Chr1	3 genes BPSL3262,BPSL3265,BPSL3266
GI12 (12 genes)	prophage-like	Chr1	BPSL3348
GI13 (18 genes)	prophage-like	Chr2	BPSS0382
GI14 (15 genes)	contains putative collagenase	Chr2	BPSS0653
GI15 (50 genes)	putative prophage	Chr2	4 genes BPSS1052-BPSS1055
GI16 (42 genes)	metabolic island	Chr2	6 genes BPSS2062-BPSS2064,BPSS2066,BPSS2083,BPSS2090
