# Supplementary material for: The Condition-Dependent Transcriptional Landscape of Burkholderia pseudomallei
Source: PLoS Genet. 2013 Sep 12;9(9):e1003795. doi: 10.1371/journal.pgen.1003795 (PMC3772027; doi:10.1371/journal.pgen.1003795)
Supplement: Table S5 — The total number of expressed genomic features in each condition. (XLS) [file pgen.1003795.s013.xls]

## Sheet: (A) Expressed Features
Table S5. Total number of expressed genomic features in each condition. (A) Statistics include the number of expressed Sanger-annotated genes, novel genes predicted by FGENESB, operons and non-coding RNAs (ncRNAs) per condition.
No.	General Perturbation	Bacterial Strain	Sample Name/Condition	No. of TARs	Total no. of bp	Shortest TAR (bp)	Shortest TAR (# of probes)	Longest TAR (bp)	Longest TAR (# of probes)	% genome coverage (bp)	Final no. of Sanger genes & Rfam	% Sanger genes & Rfam (5935)	Final no. of FGENESB novel genes	No. of operons	ncRNA
GENERAL
1	Growth (liquid medium)	BpK96243	K9LBS	3231	4086541	215	6.14286	22413	640.371	0.281926	3342	0.5631	99	565	197
			K9LBML	3578	4050578	215	6.14286	24589	702.543	0.279445	3302	0.556361	91	512	188
			K9LBES	3345	4122606	215	6.14286	22413	640.371	0.284414	3313	0.558214	104	549	206
			K9CDMML	3595	3771473	215	6.14286	19436	555.314	0.26019	2938	0.495029	89	411	212
			K9CDMES	3328	3828733	215	6.14286	38195	1091.29	0.26414	3082	0.519292	91	468	187
		Bp22	Bp22LBML	3193	3874246	215	6.14286	24028	686.514	0.26728	2985	0.502949	55	513	110
			Bp22LBES	3512	3977857	215	6.14286	22239	635.4	0.274428	3015	0.508003	59	497	154
			Bp22CDMML	3542	4017700	215	6.14286	19436	555.314	0.277177	2691	0.453412	66	400	157
			Bp22CDMES	3368	4215296	215	6.14286	23816	680.457	0.290808	2746	0.462679	88	428	155
2	Growth (Plate culture)	BpK96243	K9Plate	3451	3887390	215	6.14286	20832	595.2	0.268187	2973	0.500927	112	443	208
3	Anaerobic condition	BpK96243	K9Aer1wk	3417	3628407	215	6.14286	23152	661.486	0.25032	2883	0.485762	78	437	174
			K9Anaer1wk	4470	2324294	215	6.14286	8528	243.657	0.16035	1104	0.186015	85	93	248
			K9Aer2wks	3515	3546709	215	6.14286	26966	770.457	0.244683	2626	0.44246	78	412	179
			K9Anaer2wks	3696	2755714	215	6.14286	20111	574.6	0.190114	1941	0.327043	87	251	224
4	Desiccation and Rehydration	BpK96243	K9DesRef	3729	3515177	215	6.14286	28820	823.429	0.242508	2760	0.465038	66	376	113
			K9Des24hrs	3219	3627007	215	6.14286	35897	1025.63	0.250223	2985	0.502949	55	451	106
			K9Revived	3346	3608646	215	6.14286	35888	1025.37	0.248956	2975	0.501264	58	428	91
5	Amino acid supplement (Taurine as a sulfur source)	BpK96243	K9Na2SO4ML	3604	4087933	215	6.14286	38903	1111.51	0.282022	2922	0.492334	62	443	173
			K9Na2SO4ES	3545	4058238	215	6.14286	38932	1112.34	0.279973	2793	0.470598	58	422	161
			K9TaurineML	3607	4092409	215	6.14286	39325	1123.57	0.282331	2903	0.489132	63	427	158
			K9TaurineES	3477	3989544	215	6.14286	39286	1122.46	0.275234	2754	0.464027	60	419	156
6	Divalent cations supplement	BpK96243	K91XTSBDCML	3338	4374694	215	6.14286	47852	1367.2	0.301805	3442	0.579949	86	575	165
			K9Ca2+ML	3357	4228270	215	6.14286	47477	1356.49	0.291704	3289	0.55417	89	545	158
			K9Mg2+ML	3282	4226864	215	6.14286	46112	1317.49	0.291607	3232	0.544566	87	532	163
			K9Cu2+ML	3176	4062468	215	6.14286	46112	1317.49	0.280265	3136	0.528391	75	507	151
			K9Mn2+ML	3305	4207545	215	6.14286	47792	1365.49	0.290274	3279	0.552485	81	537	160
			K9Zn2+ML	3308	4028425	215	6.14286	47330	1352.29	0.277916	3131	0.527548	78	505	150
7	Iron supplement	BpK96243	K9Fe3+ML	3297	4342167	215	6.14286	47819	1366.26	0.299561	3408	0.574221	85	577	154
			K9Fe3+24hrs	3354	4012063	215	6.14286	24927	712.2	0.276788	3067	0.516765	81	459	178
8	Human factors supplement	BpK96243	K91XDPBS16hrs	3575	3702835	215	6.14286	19472	556.343	0.255454	2792	0.47043	105	436	250
			K9Insulin	3742	3992559	215	6.14286	22302	637.2	0.275442	3124	0.526369	117	489	264
			K930NHS	3495	3767807	215	6.14286	21687	619.629	0.259937	2990	0.503791	92	447	215
STRESSES
PHYSICAL STRESS
9	Temperature Stress	BpK96243	K904C30mins	3060	4116126	215	6.14286	28748	821.371	0.283967	3090	0.52064	81	539	108
			K904C16hrs	2917	4043763	215	6.14286	44631	1275.17	0.278975	2965	0.499579	80	513	118
			K928C30mins	3120	4000051	215	6.14286	25311	723.171	0.275959	3078	0.518618	92	539	153
			K928C16hrs	3212	4106257	215	6.14286	33924	969.257	0.283286	3269	0.5508	78	542	169
			K937C30mins	3280	4098250	215	6.14286	23894	682.686	0.282734	3085	0.519798	95	531	161
			K937C16hrs	3243	4201623	215	6.14286	33651	961.457	0.289865	3164	0.533109	77	525	158
			K942C30mins	3246	3978670	215	6.14286	23894	682.686	0.274484	3010	0.507161	90	530	168
			K942C16hrs	3222	3910890	215	6.14286	25311	723.171	0.269808	3097	0.52182	103	546	193
10	Osmotic Stress	BpK96243	K9OsmRef	3277	3869978	215	6.14286	33693	962.657	0.266985	3091	0.520809	71	487	139
			K92MNaCl	2895	3918390	215	6.14286	35960	1027.43	0.270325	3136	0.528391	69	535	107
			K92MSorbitol	3227	3695358	215	6.14286	22037	629.629	0.254939	2871	0.483741	108	451	216
11	UV Irradiation	BpK96243	K9UV10minsref	3492	3874549	215	6.14286	24874	710.686	0.267301	2683	0.452064	73	437	155
			K9UV1hrref	3071	4218535	215	6.14286	25311	723.171	0.291032	3204	0.539848	97	552	153
			K9UV10mins	3378	3792415	215	6.14286	24874	710.686	0.261634	2703	0.455434	73	442	154
			K9UV1hr	3541	3799457	215	6.14286	21959	627.4	0.26212	2957	0.498231	100	459	170
12	Nutrient Deprivation	BpK96243	K9H2O1hrref	3556	4047319	215	6.14286	28892	825.486	0.27922	2990	0.503791	70	487	156
			K9H2O24hrref	3422	3896566	215	6.14286	19481	556.6	0.26882	2983	0.502612	95	451	222
			K9H2O1hr	3826	3883087	215	6.14286	19436	555.314	0.26789	2842	0.478854	98	416	197
			K9H2O24hr	3533	3421643	215	6.14286	12054	344.4	0.236055	2696	0.454254	91	393	249
CHEMICAL STRESS
13	Antibiotics treatment	BpK96243	K9MHB	3343	4154682	215	6.14286	33651	961.457	0.286627	3267	0.550463	88	509	143
			K9Ceft	3073	4128719	215	6.14286	25311	723.171	0.284836	3330	0.561078	105	577	131
			K9Chlamp	3355	3971055	215	6.14286	23816	680.457	0.273959	3136	0.528391	102	517	144
14	Acid and Alkali	BpK96243	K9pH4	3583	3625177	215	6.14286	19436	555.314	0.250097	2585	0.435552	96	348	226
			K9pH7	3455	3326186	215	6.14286	19442	555.486	0.22947	2531	0.426453	77	338	201
15	Oxidative Stress	BpK96243	K9H2O2ref	3803	3677416	215	6.14286	14579	416.543	0.253701	2678	0.451222	78	407	184
			K9H2O210mins	3453	3865063	215	6.14286	21854	624.4	0.266646	2783	0.468913	70	460	167
			K9ChemRef	3334	4112949	215	6.14286	33747	964.2	0.283748	3219	0.542376	81	522	148
			K9Bleach	3309	4226883	215	6.14286	33747	964.2	0.291608	3133	0.527885	81	512	155
16	Heavy Metals	BpK96243	K91XTSBDC24hrs	3412	3629773	215	6.14286	47471	1356.31	0.250414	2687	0.452738	79	360	165
			K9Cd2+24hrs	3611	3987210	215	6.14286	38546	1101.31	0.275073	2985	0.502949	92	445	195
			K9Pb2+24hrs	3833	3746843	215	6.14286	47786	1365.31	0.25849	2563	0.431845	74	341	162
			K9Ni2+24hrs	3516	3900822	215	6.14286	47471	1356.31	0.269113	2660	0.448189	68	372	168
			K9Al3+24hrs	3467	3830320	215	6.14286	47471	1356.31	0.264249	2711	0.456782	69	375	168
INFECTION
17	In vitro	Bp22	Bp22RAW	3140	2906135	215	6.14286	21995	628.429	0.200491	2321	0.39107	75	336	161
		Bp22 ΔBprC	Bp22BprCRAW	3397	2940221	215	6.14286	21995	628.429	0.202842	2240	0.377422	81	312	165
		Bp22 ΔVirAG	Bp22VirAGRAW	3306	3071103	215	6.14286	22037	629.629	0.211872	2377	0.400505	84	340	159
18	In vivo	BpK96243	K9BALBcLungs	2634	1378739	215	6.14286	19406	554.457	0.0951176	889	0.149789	34	68	106
MUTANTS
19	Sigma factor	BpAL30 (RpoE)	AL3004C30mins	2851	4160908	215	6.14286	46358	1324.51	0.287056	3073	0.517776	82	533	119
			AL3004C16hrs	3064	4061104	215	6.14286	33547	958.486	0.280171	2996	0.504802	80	483	153
			AL3037C30mins	3270	4130349	215	6.14286	25006	714.457	0.284948	3131	0.527548	96	549	162
			AL3037C16hrs	3141	4035671	215	6.14286	27633	789.514	0.278416	3126	0.526706	83	520	154
			AL30H2O2ref	3578	3412255	215	6.14286	18389	525.4	0.235408	2466	0.415501	87	345	218
			AL30H2O210mins	3552	3699198	215	6.14286	25311	723.171	0.255203	2798	0.471441	84	432	193
20	Quorum sensing	Bp008	Bp008	3395	4089739	215	6.14286	21786	622.457	0.282146	3028	0.510194	76	501	152
		Bp008::pmlI:Tc	Bp008pmlITc	3518	4228152	215	6.14286	28853	824.371	0.291695	3181	0.535973	75	516	211
21	T3SS3	Bp 22	Bp22LB3hr	3178	4484110	215	6.14286	23894	682.686	0.309354	3483	0.586858	70	609	127
			Bp22LB4hr	3264	4192771	215	6.14286	22302	637.2	0.289254	3310	0.557709	68	553	155
		Bp 22 ΔbprP	Bp22BprP	3139	4379674	215	6.14286	23894	682.686	0.302149	3412	0.574895	76	600	141
		Bp 22 ΔbsaN	Bp22bsaN	3083	4274471	215	6.14286	30711	877.457	0.294891	3399	0.572704	74	590	142
		Bp 22 ΔbprC	Bp22BprC	3231	4270941	215	6.14286	22656	647.314	0.294647	3381	0.569671	76	575	153
			Average	3375.65	3.86322e+06	215	6.14286	29147.8	832.795	0.266519	2923.37	0.492564	81.4878	461.878	167.549
			Median	3354.5	3988377	215	6.14286	25158.5	718.814	0.275154	2990	0.503791	81	475.5	161

## Sheet: (B) Distribution Novel Genes
(B) Distribution of expressed novel genes across different number of conditions.
Number of Conditions	Number of Novel Genes Expressed	Number of Expressed Novel Genes in Chr1	Number of Expressed Novel Genes in Chr2
1	54	27	27
2	30	13	17
3	18	8	10
4	10	4	6
5	11	5	6
6	11	3	8
7	11	6	5
8	7	3	4
9	4	1	3
10	4	3	1
11	6	6	0
12	2	1	1
13	6	4	2
14	2	1	1
15	1	1	0
16	8	6	2
17	2	2	0
18	4	3	1
19	3	2	1
21	3	0	3
22	8	5	3
24	1	1	0
26	2	1	1
27	1	1	0
28	4	1	3
29	3	0	3
30	2	1	1
31	2	2	0
32	2	0	2
33	2	2	0
34	1	0	1
35	3	1	2
36	2	1	1
37	1	0	1
38	2	0	2
39	3	2	1
40	1	1	0
41	1	1	0
42	3	0	3
43	2	2	0
45	1	0	1
46	4	4	0
47	1	0	1
48	1	0	1
49	1	0	1
50	1	1	0
51	2	2	0
52	1	1	0
53	1	0	1
54	1	1	0
55	1	1	0
56	3	1	2
57	1	0	1
58	2	0	2
59	1	1	0
60	1	1	0
61	2	1	1
62	3	1	2
63	2	2	0
64	4	2	2
65	2	2	0
67	2	1	1
68	1	1	0
69	1	1	0
70	1	1	0
71	1	0	1
74	1	1	0
75	1	1	0
77	1	1	0
78	1	0	1
80	5	2	3
81	4	4	0
82	8	4	4
