# Supplementary material for: The Condition-Dependent Transcriptional Landscape of Burkholderia pseudomallei
Source: PLoS Genet. 2013 Sep 12;9(9):e1003795. doi: 10.1371/journal.pgen.1003795 (PMC3772027; doi:10.1371/journal.pgen.1003795)
Supplement: Table S7 — Details of transcriptional landscape comparison between chromosome 1 (Chr1) and chromosome 2 (Chr2) in each condition. (XLS) [file pgen.1003795.s015.xls]

## Sheet: (A) Overall Statistics
Table S7. Details of transcriptional landscape comparison between chromosome 1 (Chr1) and chromosome 2 (Chr2) in each condition.
(A) Statistics of the total number of expressed genes, with respect to total number of genes in Chr1 and Chr2 respectively, the distribution of expressed genes in each chromosome with respect to the total expressed genes per condition, the ratio of expressed genes in Chr1 to Chr2, and the significance testing of the expression levels of expressed genes from the two chromosomes. More than half of …
No.	General Perturbation	Bacterial Strain	Sample Name/Condition	No. of TARs	Total no. of bp	Shortest TAR (bp)	Shortest TAR (# of probes)	Longest TAR (bp)	Longest TAR (# of probes)	% genome coverage (bp)	Total number of expressed genes	Chr1 (3529)	Chr2 (2406)	Chr1 (% Chr)*	Chr2 (% Chr)*	Chr1 (% Con)Ŧ	Chr2 (% Con)Ŧ	Chr1/Chr2_normalized	p-values (signal medians)
GENERAL
1	Growth (liquid medium)	BpK96243	K9LBS	3231	4086541	215	6.14286	22413	640.371	0.281926	3342	2404	938	68.1213	38.9859	71.933	28.067	1.74733	8.21213e-130
			K9LBML	3578	4050578	215	6.14286	24589	702.543	0.279445	3302	2319	983	65.7127	40.8562	70.2302	29.7698	1.60839	4.78534e-87
			K9LBES	3345	4122606	215	6.14286	22413	640.371	0.284414	3313	2364	949	66.9878	39.4431	71.3553	28.6447	1.69834	1.06663e-111
			K9CDMML	3595	3771473	215	6.14286	19436	555.314	0.26019	2938	1988	950	56.3332	39.4846	67.6651	32.3349	1.42671	7.30118e-27
			K9CDMES	3328	3828733	215	6.14286	38195	1091.29	0.26414	3082	2155	927	61.0655	38.5287	69.9221	30.0779	1.58494	1.518e-70
		Bp22	Bp22LBML	3193	3874246	215	6.14286	24028	686.514	0.26728	2985	2210	775	62.624	32.2111	74.0369	25.9631	1.94417	3.44583e-119
			Bp22LBES	3512	3977857	215	6.14286	22239	635.4	0.274428	3015	2164	851	61.3205	35.3699	71.7745	28.2255	1.73369	5.71654e-82
			Bp22CDMML	3542	4017700	215	6.14286	19436	555.314	0.277177	2691	1902	789	53.8963	32.793	70.68	29.32	1.64353	9.46853e-57
			Bp22CDMES	3368	4215296	215	6.14286	23816	680.457	0.290808	2746	1956	790	55.4265	32.8346	71.2309	28.7691	1.68805	4.51444e-75
2	Growth (Plate culture)	BpK96243	K9Plate	3451	3887390	215	6.14286	20832	595.2	0.268187	2973	2025	948	57.3817	39.4015	68.113	31.887	1.45633	1.87045e-42
3	Anaerobic condition	BpK96243	K9Aer1wk	3417	3628407	215	6.14286	23152	661.486	0.25032	2883	2074	809	58.7702	33.6243	71.939	28.061	1.74785	4.73237e-91
			K9Anaer1wk	4470	2324294	215	6.14286	8528	243.657	0.16035	1104	800	304	22.6693	12.6351	72.4638	27.5362	1.79416	1.17809e-20
			K9Aer2wks	3515	3546709	215	6.14286	26966	770.457	0.244683	2626	1979	647	56.0782	26.8911	75.3618	24.6382	2.08538	1.78521e-103
			K9Anaer2wks	3696	2755714	215	6.14286	20111	574.6	0.190114	1941	1528	413	43.2984	17.1654	78.7223	21.2777	2.52242	5.17847e-79
4	Desiccation and Rehydration	BpK96243	K9DesRef	3729	3515177	215	6.14286	28820	823.429	0.242508	2760	1997	763	56.5883	31.7124	72.3551	27.6449	1.78442	1.9234e-54
			K9Des24hrs	3219	3627007	215	6.14286	35897	1025.63	0.250223	2985	2154	831	61.0371	34.5387	72.1608	27.8392	1.76721	1.54934e-52
			K9Revived	3346	3608646	215	6.14286	35888	1025.37	0.248956	2975	2123	852	60.1587	35.4115	71.3613	28.6387	1.69885	1.2089e-43
5	Amino acid supplement (Taurine as a sulfur source)	BpK96243	K9Na2SO4ML	3604	4087933	215	6.14286	38903	1111.51	0.282022	2922	2026	896	57.41	37.2402	69.3361	30.6639	1.54161	2.24941e-51
			K9Na2SO4ES	3545	4058238	215	6.14286	38932	1112.34	0.279973	2793	2013	780	57.0417	32.419	72.073	27.927	1.75952	1.40316e-78
			K9TaurineML	3607	4092409	215	6.14286	39325	1123.57	0.282331	2903	2025	878	57.3817	36.4921	69.7554	30.2446	1.57244	2.18017e-56
			K9TaurineES	3477	3989544	215	6.14286	39286	1122.46	0.275234	2754	1991	763	56.4182	31.7124	72.2948	27.7052	1.77906	5.58371e-88
6	Divalent cations supplement	BpK96243	K91XTSBDCML	3338	4374694	215	6.14286	47852	1367.2	0.301805	3442	2390	1052	67.7246	43.724	69.4364	30.5636	1.54891	7.62022e-52
			K9Ca2+ML	3357	4228270	215	6.14286	47477	1356.49	0.291704	3289	2310	979	65.4576	40.6899	70.2341	29.7659	1.60869	1.55724e-65
			K9Mg2+ML	3282	4226864	215	6.14286	46112	1317.49	0.291607	3232	2301	931	65.2026	38.6949	71.1943	28.8057	1.68504	4.83672e-92
			K9Cu2+ML	3176	4062468	215	6.14286	46112	1317.49	0.280265	3136	2211	925	62.6523	38.4456	70.5038	29.4962	1.62964	1.33273e-56
			K9Mn2+ML	3305	4207545	215	6.14286	47792	1365.49	0.290274	3279	2288	991	64.8342	41.1887	69.7774	30.2226	1.57408	4.63102e-52
			K9Zn2+ML	3308	4028425	215	6.14286	47330	1352.29	0.277916	3131	2231	900	63.219	37.4065	71.2552	28.7448	1.69006	3.95469e-70
7	Iron supplement	BpK96243	K9Fe3+ML	3297	4342167	215	6.14286	47819	1366.26	0.299561	3408	2382	1026	67.4979	42.6434	69.8944	30.1056	1.58284	2.53358e-54
			K9Fe3+24hrs	3354	4012063	215	6.14286	24927	712.2	0.276788	3067	2148	919	60.8671	38.1962	70.0359	29.9641	1.59354	6.73781e-61
8	Human factors supplement	BpK96243	K91XDPBS16hrs	3575	3702835	215	6.14286	19472	556.343	0.255454	2792	1965	827	55.6815	34.3724	70.3797	29.6203	1.61995	7.23371e-35
			K9Insulin	3742	3992559	215	6.14286	22302	637.2	0.275442	3124	2128	996	60.3004	41.3965	68.1178	31.8822	1.45665	2.34621e-28
			K930NHS	3495	3767807	215	6.14286	21687	619.629	0.259937	2990	2063	927	58.4585	38.5287	68.9967	31.0033	1.51727	4.57432e-42
STRESSES
PHYSICAL STRESS
9	Temperature Stress	BpK96243	K904C30mins	3060	4116126	215	6.14286	28748	821.371	0.283967	3090	2289	801	64.8626	33.2918	74.0777	25.9223	1.94831	1.4763e-153
			K904C16hrs	2917	4043763	215	6.14286	44631	1275.17	0.278975	2965	2213	752	62.709	31.2552	74.6374	25.3626	2.00635	3.91988e-148
			K928C30mins	3120	4000051	215	6.14286	25311	723.171	0.275959	3078	2316	762	65.6277	31.6708	75.2437	24.7563	2.07218	1.07537e-172
			K928C16hrs	3212	4106257	215	6.14286	33924	969.257	0.283286	3269	2335	934	66.1661	38.8196	71.4286	28.5714	1.70445	1.00772e-90
			K937C30mins	3280	4098250	215	6.14286	23894	682.686	0.282734	3085	2310	775	65.4576	32.2111	74.8784	25.1216	2.03214	3.41641e-158
			K937C16hrs	3243	4201623	215	6.14286	33651	961.457	0.289865	3164	2318	846	65.6843	35.1621	73.2617	26.7383	1.86804	4.94938e-99
			K942C30mins	3246	3978670	215	6.14286	23894	682.686	0.274484	3010	2280	730	64.6075	30.3408	75.7475	24.2525	2.12939	1.35439e-180
			K942C16hrs	3222	3910890	215	6.14286	25311	723.171	0.269808	3097	2340	757	66.3077	31.463	75.557	24.443	2.10748	2.92509e-149
10	Osmotic Stress	BpK96243	K9OsmRef	3277	3869978	215	6.14286	33693	962.657	0.266985	3091	2243	848	63.5591	35.2452	72.5655	27.4345	1.80334	7.15333e-87
			K92MNaCl	2895	3918390	215	6.14286	35960	1027.43	0.270325	3136	2301	835	65.2026	34.7049	73.3737	26.6263	1.87877	2.39953e-116
			K92MSorbitol	3227	3695358	215	6.14286	22037	629.629	0.254939	2871	2163	708	61.2922	29.4264	75.3396	24.6604	2.08289	1.44137e-148
11	UV Irradiation	BpK96243	K9UV10minsref	3492	3874549	215	6.14286	24874	710.686	0.267301	2683	2054	629	58.2035	26.143	76.5561	23.4439	2.22635	2.69947e-169
			K9UV1hrref	3071	4218535	215	6.14286	25311	723.171	0.291032	3204	2370	834	67.1578	34.6633	73.97	26.03	1.93743	1.23787e-154
			K9UV10mins	3378	3792415	215	6.14286	24874	710.686	0.261634	2703	2057	646	58.2885	26.8495	76.1006	23.8994	2.17093	1.05576e-156
			K9UV1hr	3541	3799457	215	6.14286	21959	627.4	0.26212	2957	2121	776	60.102	32.2527	71.7281	26.2428	1.86347	1.00338e-129
12	Nutrient Deprivation	BpK96243	K9H2O1hrref	3556	4047319	215	6.14286	28892	825.486	0.27922	2990	2195	795	62.1989	33.0424	73.4114	26.5886	1.8824	4.52553e-106
			K9H2O24hrref	3422	3896566	215	6.14286	19481	556.6	0.26882	2983	2029	954	57.495	39.6509	68.0188	31.9812	1.45003	7.63591e-80
			K9H2O1hr	3826	3883087	215	6.14286	19436	555.314	0.26789	2842	2013	831	57.0417	34.5387	70.8304	29.24	1.65153	1.07504e-41
			K9H2O24hr	3533	3421643	215	6.14286	12054	344.4	0.236055	2696	1914	782	54.2363	32.5021	70.9941	29.0059	1.6687	1.46971e-48
CHEMICAL STRESS
13	Antibiotics treatment	BpK96243	K9MHB	3343	4154682	215	6.14286	33651	961.457	0.286627	3267	2346	921	66.4778	38.2793	71.809	28.191	1.73665	1.46675e-110
			K9Ceft	3073	4128719	215	6.14286	25311	723.171	0.284836	3330	2447	883	69.3398	36.6999	73.4835	26.5165	1.88937	2.66213e-171
			K9Chlamp	3355	3971055	215	6.14286	23816	680.457	0.273959	3136	2307	829	65.3726	34.4555	73.5651	26.4349	1.8973	1.17612e-149
14	Acid and Alkali	BpK96243	K9pH4	3583	3625177	215	6.14286	19436	555.314	0.250097	2585	1779	806	50.4109	33.4996	68.8201	31.1799	1.50482	4.85702e-26
			K9pH7	3455	3326186	215	6.14286	19442	555.486	0.22947	2531	1741	790	49.3341	32.8346	68.787	31.213	1.5025	6.82858e-31
15	Oxidative Stress	BpK96243	K9H2O2ref	3803	3677416	215	6.14286	14579	416.543	0.253701	2678	1907	771	54.038	32.0449	71.2099	28.7901	1.68632	6.77121e-58
			K9H2O210mins	3453	3865063	215	6.14286	21854	624.4	0.266646	2783	2036	747	57.6934	31.0474	73.1585	26.8415	1.85824	1.33756e-106
			K9ChemRef	3334	4112949	215	6.14286	33747	964.2	0.283748	3219	2344	875	66.4211	36.3674	72.8176	27.1824	1.82639	4.41524e-135
			K9Bleach	3309	4226883	215	6.14286	33747	964.2	0.291608	3133	2277	856	64.5225	35.5777	72.6779	27.3221	1.81357	1.15243e-114
16	Heavy Metals	BpK96243	K91XTSBDC24hrs	3412	3629773	215	6.14286	47471	1356.31	0.250414	2687	1837	850	52.0544	35.3283	68.3662	31.6338	1.47345	3.78798e-35
			K9Cd2+24hrs	3611	3987210	215	6.14286	38546	1101.31	0.275073	2985	2093	892	59.3086	37.074	70.1173	29.8827	1.59974	1.67249e-64
			K9Pb2+24hrs	3833	3746843	215	6.14286	47786	1365.31	0.25849	2563	1748	815	49.5324	33.8736	68.2013	31.7987	1.46227	6.74144e-33
			K9Ni2+24hrs	3516	3900822	215	6.14286	47471	1356.31	0.269113	2660	1864	796	52.8195	33.084	70.0752	29.9248	1.59653	1.07271e-47
			K9Al3+24hrs	3467	3830320	215	6.14286	47471	1356.31	0.264249	2711	1865	846	52.8478	35.1621	68.7938	31.2062	1.50298	6.51142e-40
INFECTION
17	In vitro	Bp22	Bp22RAW	3140	2906135	215	6.14286	21995	628.429	0.200491	2321	1781	540	50.4676	22.4439	76.7342	23.2658	2.24861	5.46373e-83
		Bp22 ΔBprC	Bp22BprCRAW	3397	2940221	215	6.14286	21995	628.429	0.202842	2240	1715	525	48.5973	21.8204	76.5625	23.4375	2.22715	4.53321e-82
		Bp22 ΔVirAG	Bp22VirAGRAW	3306	3071103	215	6.14286	22037	629.629	0.211872	2377	1825	552	51.7144	22.9426	76.7775	23.2225	2.25407	5.28712e-91
18	In vivo	BpK96243	K9BALBcLungs	2634	1378739	215	6.14286	19406	554.457	0.0951176	889	664	225	18.8155	9.35162	74.6907	25.3093	2.01201	2.77043e-27
MUTANTS
19	Sigma factor	BpAL30 (RpoE)	AL3004C30mins	2851	4160908	215	6.14286	46358	1324.51	0.287056	3073	2274	799	64.4375	33.2086	73.9993	26.0007	1.94038	1.20852e-155
			AL3004C16hrs	3064	4061104	215	6.14286	33547	958.486	0.280171	2996	2194	802	62.1706	33.3333	73.231	26.769	1.86512	1.96711e-100
			AL3037C30mins	3270	4130349	215	6.14286	25006	714.457	0.284948	3131	2327	804	65.9394	33.4165	74.3213	25.6787	1.97326	3.55464e-160
			AL3037C16hrs	3141	4035671	215	6.14286	27633	789.514	0.278416	3126	2272	854	64.3808	35.4946	72.6807	27.3193	1.81382	1.69806e-94
			AL30H2O2ref	3578	3412255	215	6.14286	18389	525.4	0.235408	2466	1756	710	49.7591	29.5096	71.2084	28.7916	1.6862	1.4153e-49
			AL30H2O210mins	3552	3699198	215	6.14286	25311	723.171	0.255203	2798	2020	778	57.24	32.3358	72.1944	27.8056	1.77017	8.41037e-84
20	Quorum sensing	Bp008	Bp008	3395	4089739	215	6.14286	21786	622.457	0.282146	3028	2103	925	59.592	38.4456	69.4518	30.5482	1.55003	2.58022e-51
		Bp008::pmlI:Tc	Bp008pmlITc	3518	4228152	215	6.14286	28853	824.371	0.291695	3181	2159	1022	61.1788	42.4771	67.8717	32.1283	1.44028	4.29358e-49
21	T3SS3	Bp 22	Bp22LB3hr	3178	4484110	215	6.14286	23894	682.686	0.309354	3483	2477	1006	70.1899	41.8121	71.1169	28.8831	1.6787	2.88025e-115
			Bp22LB4hr	3264	4192771	215	6.14286	22302	637.2	0.289254	3310	2372	938	67.2145	38.9859	71.6616	28.3384	1.72407	8.53658e-101
		Bp 22 ΔbprP	Bp22BprP	3139	4379674	215	6.14286	23894	682.686	0.302149	3412	2478	934	70.2182	38.8196	72.626	27.374	1.80883	1.01667e-156
		Bp 22 ΔbsaN	Bp22bsaN	3083	4274471	215	6.14286	30711	877.457	0.294891	3399	2437	962	69.0564	39.9834	71.6976	28.3024	1.72713	1.88243e-61
		Bp 22 ΔbprC	Bp22BprC	3231	4270941	215	6.14286	22656	647.314	0.294647	3381	2417	964	68.4897	40.0665	71.4877	28.5123	1.7094	1.04648e-186
Global (all 82 conditions)											5467	3339	2128	61.05 (Median)	34.60 (Median)	71.75 (Median)	28.21 (Median)	1.74 (Median)	NA
*	% Chr	Chr 1 = [Col M]/3529*100	Chr 2 = [Col N]/2406*100
Ŧ	% Con	Chr 1 = [Col M]/[Col L]*100	Chr 2 = [Col N]/[Col L]*100

## Sheet: (B) Chr1 vs Chr2
(B) Median expression of expressed genes in chromosome 1 (Chr1) and chromosome 2 (Chr2) , and difference in median expression between both chromosomes per condition. The difference in median expression is signifcantly different (p = 2.68E-18, two-tailed T-test).
Condition	Chr1	Chr2	Difference (Chr1-Chr2)
K9Insulin	11.1091	11.1588	-0.0496595
K9CDMML	11.8594	11.8859	-0.0265134
AL30H2O2ref	11.1203	11.1321	-0.0117731
K9pH7	10.505	10.5133	-0.0083015
K9Anaer1wk	9.98424	9.97396	0.0102828
K9Aer2wks	10.772	10.7563	0.015738
K9BALBcLungs	9.93384	9.90779	0.026045
K91XTSBDC24hrs	11.3095	11.2794	0.0301424
K9Fe3.24hrs	11.7346	11.693	0.041587
K9Revived	10.1964	10.1488	0.0476255
K9DesRef	10.4673	10.4182	0.049138
Bp22bsaN	11.2609	11.2108	0.0500885
Bp22CDMML	11.7045	11.6508	0.0537157
K9Al3.24hrs	11.4596	11.3989	0.0607048
K930NHS	11.2669	11.188	0.078852
K9Mn2.ML	11.2923	11.2134	0.0788895
K9Pb2.24hrs	10.9334	10.853	0.0804515
K937C16hrs	11.1411	11.0602	0.080916
K9Des24hrs	10.2403	10.1578	0.082513
K9H2O2ref	11.406	11.3144	0.09159
K9pH4	11.2777	11.1812	0.096508
K9Na2SO4ML	11.6031	11.5003	0.102775
K9H2O24hrref	11.536	11.4315	0.104556
K9Anaer2wks	10.1956	10.0878	0.107758
K91XTSBDCML	11.463	11.3545	0.108543
K9Ca2.ML	11.5866	11.4754	0.111182
K9TaurineML	11.54	11.4233	0.116776
K91XDPBS16hrs	10.837	10.72	0.117005
Bp008	11.1029	10.9732	0.129725
K9H2O24hr	10.8516	10.7193	0.13228
AL30H2O210mins	11.6123	11.4777	0.134635
K9Aer1wk	11.09	10.9468	0.143282
K9Plate	11.3611	11.2121	0.14903
Bp22RAW	10.1847	10.0305	0.154238
K9OsmRef	10.9618	10.8063	0.155568
AL3037C16hrs	10.8466	10.6779	0.168706
K9Ni2.24hrs	10.9965	10.827	0.169546
K9Cu2.ML	10.926	10.7558	0.170137
Bp22BprCRAW	10.3527	10.1818	0.170845
K9CDMES	12.1234	11.9515	0.171845
K9Na2SO4ES	11.478	11.3048	0.173182
K9Fe3.ML	11.5759	11.3978	0.178103
K9LBML	12.1372	11.9534	0.183858
Bp22VirAGRAW	10.3344	10.1291	0.205235
K928C16hrs	11.466	11.2555	0.210518
K9H2O1hrref	11.6958	11.4811	0.2147
K9Bleach	11.3163	11.0914	0.224901
K9Zn2.ML	10.8599	10.6257	0.234173
K9UV10mins	12.0941	11.8574	0.236741
K9TaurineES	11.7879	11.5505	0.237419
K9Cd2.24hrs	11.5122	11.2705	0.241631
Bp22LBES	11.3371	11.0814	0.255657
Bp22CDMES	11.9308	11.6737	0.257151
K9MHB	11.694	11.4333	0.260786
K9H2O1hr	11.6475	11.3802	0.267281
Bp008pmlITc	11.8848	11.6125	0.272307
AL3004C16hrs	10.845	10.572	0.273009
K9H2O210mins	11.7631	11.4813	0.281719
K9Mg2.ML	11.6751	11.3891	0.286055
K9UV1hr	11.6545	11.3446	0.309836
K942C16hrs	10.8276	10.4894	0.338287
K9ChemRef	11.3147	10.9577	0.356963
K9UV10minsref	11.9138	11.5561	0.357632
Bp22LB4hr	11.4049	11.0341	0.370783
Bp22LBML	11.6734	11.3006	0.372786
K904C16hrs	11.8288	11.4475	0.381279
K9LBES	12.553	12.1674	0.385653
K92MNaCl	11.3048	10.9189	0.385934
K937C30mins	11.4523	11.0651	0.387214
K9LBS	12.5056	12.08	0.42563
K904C30mins	12.0961	11.6517	0.444399
K928C30mins	11.7785	11.3237	0.454882
K942C30mins	11.7919	11.3353	0.456572
K92MSorbitol	11.9042	11.4465	0.457725
AL3037C30mins	11.74	11.2608	0.479204
K9UV1hrref	11.9055	11.4249	0.480596
AL3004C30mins	12.0368	11.534	0.502824
Bp22LB3hr	11.8908	11.373	0.517817
K9Chlamp	11.9272	11.3742	0.553024
K9Ceft	12.1327	11.5689	0.563841
Bp22BprP	12.1595	11.4163	0.743194
Bp22BprC	11.703	10.7325	0.970517

## Sheet: (C) Correlations in Chr1,Chr2
(C) Pearson's correlation coefficients of all conditions in the compendium with respect to Bp Chr 1 and Chr 2. Conditions in Chr 1 are highly correlated to one another (Pearson’s correlation coefficient > 0.8); conditions in Chr 2 show low correlation (Pearson’s correlation coefficient < 0.7). Exceptionally low correlations (Pearson’s correlation coefficient < 0.6) in sectors 1A and 1B of Chr 1 a…
Condition-specific clusters observed from Bp Chr2:
Cluster no.	No. of conditions	Types of conditions
Cluster 2A	20	Bp strain specific responses (many Bp22 and BpAL30 samples), cold temperature stress, early response to body temperature exposure, salt stress and UV exposure.
Cluster 2B	12	Dehydration stress, antibiotic stress and in vitro cell-line infections.
Cluster 2C	15	Divalent cations, chemical stress, late response to body temperature exposure and overnight growth in rich media
Cluster 2D	16	Heavy metal stresses, growth in minimal media, including minimal medium supplemented with sulfur sources and exposure to physiological doses of human insulin.
Cluster 2E	11	Oxidative stress, exposure to 30% normal human serum and different growth phases in rich medium, quorum sensing mutant.
Cluster 2F	5	Distilled water, saline and acidic pH.
Cluster 2G	5	Samples that exhibited relatively higher background noises during microarray processing and thus is a technical cluster, not a true biological cluster.

## Sheet: (D) Correlation Matrix (Chr1)
(D) Correlation matrix based on gene expression from Bp Chromosome 1 across all conditions.
Array Name	AL3004C16hrs	AL3004C30mins	AL3037C16hrs	AL3037C30mins	AL30H2O210mins	AL30H2O2ref	Bp008	Bp008pmlITc	Bp22BprC	Bp22BprCRAW	Bp22BprP	Bp22bsaN	Bp22CDMES	Bp22CDMML	Bp22LB3hr	Bp22LB4hr	Bp22LBES	Bp22LBML	Bp22RAW	Bp22VirAGRAW	K904C16hrs	K904C30mins	K91XDPBS16hrs	K91XTSBDC24hrs	K91XTSBDCML	K928C16hrs	K928C30mins	K92MNaCl	K92MSorbitol	K930NHS	K937C16hrs	K937C30mins	K942C16hrs	K942C30mins	K9Aer1wk	K9Aer2wks	K9Al3+24hrs	K9Anaer1wk	K9Anaer2wks	K9BALBcLungs	K9Bleach	K9Ca2+ML	K9Cd2+24hrs	K9CDMES	K9CDMML	K9Ceft	K9ChemRef	K9Chlamp	K9Cu2+ML
AL3004C16hrs	1	0.942573	0.881467	0.879138	0.759323	0.746323	0.709257	0.696118	0.809013	0.752641	0.797782	0.829071	0.675431	0.72975	0.803935	0.817024	0.762767	0.801289	0.747536	0.757537	0.942536	0.909328	0.598483	0.731475	0.702437	0.834861	0.835851	0.906197	0.796836	0.708155	0.857995	0.872877	0.77935	0.826417	0.850176	0.793065	0.738455	0.52174	0.729355	0.608324	0.875838	0.72057	0.723101	0.700926	0.621802	0.835394	0.875217	0.802258	0.76886
AL3004C30mins	0.942573	1	0.860266	0.903758	0.754954	0.698115	0.698446	0.709676	0.840811	0.713437	0.861444	0.860995	0.712075	0.758923	0.853854	0.83952	0.766607	0.86482	0.704925	0.720709	0.974879	0.967734	0.556697	0.69923	0.715864	0.840823	0.88292	0.922198	0.79356	0.678142	0.857117	0.892684	0.769672	0.854209	0.831845	0.778712	0.712823	0.44026	0.674344	0.553364	0.860503	0.735527	0.707912	0.710232	0.596328	0.866534	0.865205	0.81309	0.755911
AL3037C16hrs	0.881467	0.860266	1	0.890742	0.870052	0.861119	0.759005	0.780266	0.816794	0.796776	0.791057	0.828849	0.71884	0.744454	0.801719	0.825316	0.838787	0.801854	0.789694	0.797298	0.846386	0.82471	0.675779	0.810048	0.774073	0.934952	0.828373	0.866453	0.814025	0.808333	0.985496	0.874214	0.861255	0.857545	0.928237	0.855686	0.819773	0.55268	0.791406	0.649503	0.961143	0.794837	0.804486	0.73103	0.651892	0.888611	0.94609	0.851362	0.842682
AL3037C30mins	0.879138	0.903758	0.890742	1	0.831848	0.783696	0.737546	0.770415	0.854296	0.82894	0.859508	0.868479	0.715228	0.748716	0.841385	0.852734	0.822826	0.871705	0.818487	0.83682	0.903858	0.896474	0.664256	0.701546	0.751758	0.87148	0.959199	0.907398	0.898892	0.739805	0.897103	0.984759	0.88615	0.977026	0.88579	0.833325	0.72072	0.513586	0.757503	0.622705	0.887103	0.763499	0.748769	0.706567	0.600391	0.909127	0.920262	0.911687	0.765038
AL30H2O210mins	0.759323	0.754954	0.870052	0.831848	1	0.952968	0.726268	0.825734	0.777518	0.759315	0.739413	0.766942	0.75635	0.740258	0.758825	0.782252	0.837834	0.741823	0.747398	0.755034	0.735145	0.715677	0.736487	0.780785	0.758855	0.877428	0.775058	0.737508	0.792342	0.838212	0.87262	0.796345	0.812629	0.790865	0.868037	0.758329	0.794413	0.504829	0.720133	0.587602	0.891018	0.765446	0.788278	0.731511	0.665588	0.857593	0.882165	0.816524	0.790662
AL30H2O2ref	0.746323	0.698115	0.861119	0.783696	0.952968	1	0.732359	0.804144	0.735001	0.728098	0.672433	0.719859	0.71133	0.715182	0.695068	0.748841	0.824632	0.679971	0.717457	0.723174	0.680045	0.658227	0.780983	0.806261	0.766314	0.862714	0.709053	0.713454	0.751596	0.880373	0.858792	0.752808	0.77713	0.742033	0.861903	0.753701	0.815593	0.531299	0.699038	0.590556	0.877378	0.767051	0.782467	0.728251	0.7006	0.783376	0.848996	0.757416	0.80131
Bp008	0.709257	0.698446	0.759005	0.737546	0.726268	0.732359	1	0.829034	0.772304	0.694975	0.735307	0.74794	0.718692	0.735402	0.742534	0.775404	0.84511	0.749596	0.676775	0.687447	0.693899	0.700558	0.688747	0.678799	0.676719	0.75318	0.70512	0.71147	0.71472	0.710568	0.758413	0.735875	0.73683	0.728813	0.810103	0.7841	0.690156	0.441266	0.595754	0.516249	0.76347	0.670245	0.713661	0.655316	0.626931	0.733232	0.769755	0.709141	0.691823
Bp008pmlITc	0.696118	0.709676	0.780266	0.770415	0.825734	0.804144	0.829034	1	0.83433	0.722475	0.790325	0.797924	0.832193	0.806821	0.808718	0.828851	0.915726	0.790214	0.702498	0.713808	0.695731	0.69908	0.728372	0.764823	0.748851	0.812611	0.741363	0.709786	0.73546	0.80963	0.796015	0.753162	0.746105	0.751435	0.834539	0.724485	0.783455	0.3929	0.599922	0.515934	0.814027	0.746422	0.763672	0.745444	0.666883	0.785555	0.808053	0.751186	0.751767
Bp22BprC	0.809013	0.840811	0.816794	0.854296	0.777518	0.735001	0.772304	0.83433	1	0.777212	0.964097	0.966759	0.818618	0.860033	0.972133	0.991617	0.905886	0.939457	0.754313	0.775346	0.831933	0.84203	0.587719	0.683457	0.762858	0.847743	0.837361	0.857259	0.768885	0.723494	0.832093	0.848212	0.753457	0.828792	0.807002	0.74075	0.696969	0.40064	0.601137	0.550409	0.833109	0.768135	0.693064	0.700913	0.631544	0.814019	0.838092	0.766545	0.788668
Bp22BprCRAW	0.752641	0.713437	0.796776	0.82894	0.759315	0.728098	0.694975	0.722475	0.777212	1	0.779595	0.809958	0.699357	0.703361	0.764955	0.779679	0.786045	0.784913	0.990708	0.992918	0.73529	0.712781	0.661725	0.614302	0.618577	0.761382	0.825965	0.771274	0.820276	0.665814	0.785508	0.837609	0.838838	0.822249	0.81475	0.773592	0.622721	0.594575	0.821022	0.715404	0.783706	0.623801	0.687237	0.595043	0.50632	0.803292	0.831	0.836989	0.66599
Bp22BprP	0.797782	0.861444	0.791057	0.859508	0.739413	0.672433	0.735307	0.790325	0.964097	0.779595	1	0.983265	0.801859	0.840708	0.981892	0.959563	0.856497	0.957854	0.760013	0.781888	0.860082	0.865856	0.540238	0.626495	0.712492	0.823121	0.869752	0.870868	0.760035	0.668388	0.806186	0.857127	0.733146	0.829194	0.786825	0.733344	0.637442	0.392387	0.621815	0.552497	0.802632	0.720771	0.651151	0.665718	0.561759	0.810896	0.814997	0.766415	0.735694
Bp22bsaN	0.829071	0.860995	0.828849	0.868479	0.766942	0.719859	0.74794	0.797924	0.966759	0.809958	0.983265	1	0.803618	0.846162	0.982632	0.972207	0.872381	0.9477	0.792661	0.811715	0.85621	0.852275	0.58224	0.676525	0.745792	0.857371	0.865617	0.884319	0.773272	0.720403	0.836168	0.864563	0.751209	0.830873	0.813615	0.750155	0.681263	0.42644	0.659632	0.597893	0.83637	0.754967	0.68656	0.682157	0.591261	0.811043	0.835271	0.770451	0.784138
Bp22CDMES	0.675431	0.712075	0.71884	0.715228	0.75635	0.71133	0.718692	0.832193	0.818618	0.699357	0.801859	0.803618	1	0.951489	0.820025	0.81132	0.844466	0.810313	0.678843	0.696411	0.692606	0.688982	0.649878	0.775086	0.742912	0.761947	0.712636	0.696184	0.68913	0.762246	0.731662	0.700051	0.68417	0.678043	0.745163	0.636592	0.780182	0.372906	0.602251	0.570107	0.757625	0.745555	0.750843	0.82339	0.730913	0.747006	0.745175	0.687005	0.776646
Bp22CDMML	0.72975	0.758923	0.744454	0.748716	0.740258	0.715182	0.735402	0.806821	0.860033	0.703361	0.840708	0.846162	0.951489	1	0.85052	0.858179	0.848285	0.869758	0.68352	0.706114	0.740885	0.746914	0.630288	0.761044	0.772217	0.787847	0.746225	0.767872	0.693643	0.737803	0.757696	0.743786	0.68272	0.706879	0.756695	0.670599	0.764087	0.389034	0.591748	0.593656	0.779626	0.772912	0.731157	0.818228	0.770141	0.725825	0.762031	0.671791	0.81803
Bp22LB3hr	0.803935	0.853854	0.801719	0.841385	0.758825	0.695068	0.742534	0.808718	0.972133	0.764955	0.981892	0.982632	0.820025	0.85052	1	0.969609	0.868723	0.937344	0.742393	0.762937	0.841217	0.842142	0.552686	0.662022	0.736513	0.846545	0.843644	0.851524	0.753252	0.698358	0.814765	0.832036	0.725704	0.802291	0.783974	0.711807	0.66948	0.36621	0.603089	0.542825	0.824442	0.745744	0.67222	0.687443	0.59492	0.814666	0.823026	0.754962	0.769528
Bp22LB4hr	0.817024	0.83952	0.825316	0.852734	0.782252	0.748841	0.775404	0.828851	0.991617	0.779679	0.959563	0.972207	0.81132	0.858179	0.969609	1	0.904113	0.936181	0.758871	0.777432	0.827951	0.833846	0.601325	0.689448	0.774139	0.858761	0.835056	0.856755	0.764322	0.737244	0.839385	0.84587	0.756061	0.822663	0.808761	0.745614	0.700528	0.420102	0.611037	0.569485	0.840394	0.778083	0.697829	0.696483	0.633075	0.807705	0.840414	0.761586	0.803633
Bp22LBES	0.762767	0.766607	0.838787	0.822826	0.837834	0.824632	0.84511	0.915726	0.905886	0.786045	0.856497	0.872381	0.844466	0.848285	0.868723	0.904113	1	0.866584	0.767255	0.779981	0.765798	0.771177	0.72479	0.776722	0.780138	0.8523	0.786384	0.800689	0.768729	0.811128	0.849339	0.812311	0.795034	0.807778	0.875716	0.797745	0.78896	0.444651	0.641618	0.575715	0.861014	0.778018	0.790136	0.7395	0.674306	0.818566	0.858728	0.787414	0.796882
Bp22LBML	0.801289	0.86482	0.801854	0.871705	0.741823	0.679971	0.749596	0.790214	0.939457	0.784913	0.957854	0.9477	0.810313	0.869758	0.937344	0.936181	0.866584	1	0.767351	0.79009	0.862221	0.876787	0.554629	0.648341	0.721993	0.817986	0.881187	0.892542	0.761927	0.659482	0.819969	0.875863	0.756979	0.847283	0.798651	0.765296	0.660987	0.431066	0.638146	0.593527	0.801903	0.728672	0.6759	0.659496	0.567549	0.808085	0.82207	0.777077	0.752656
Bp22RAW	0.747536	0.704925	0.789694	0.818487	0.747398	0.717457	0.676775	0.702498	0.754313	0.990708	0.760013	0.792661	0.678843	0.68352	0.742393	0.758871	0.767255	0.767351	1	0.990673	0.726626	0.702202	0.648862	0.600601	0.603494	0.751182	0.815461	0.75969	0.80275	0.653655	0.777273	0.82764	0.824593	0.809131	0.805958	0.764342	0.60916	0.595366	0.828959	0.712027	0.77614	0.608948	0.673189	0.576852	0.485231	0.788248	0.820294	0.822839	0.653669
Bp22VirAGRAW	0.757537	0.720709	0.797298	0.83682	0.755034	0.723174	0.687447	0.713808	0.775346	0.992918	0.781888	0.811715	0.696411	0.706114	0.762937	0.777432	0.779981	0.79009	0.990673	1	0.741818	0.718831	0.655663	0.606655	0.613731	0.762313	0.835552	0.776865	0.822526	0.660233	0.786916	0.845957	0.83785	0.827966	0.814298	0.775499	0.614629	0.592296	0.827449	0.709713	0.783629	0.61981	0.68073	0.590226	0.499178	0.800025	0.830432	0.835407	0.661139
K904C16hrs	0.942536	0.974879	0.846386	0.903858	0.735145	0.680045	0.693899	0.695731	0.831933	0.73529	0.860082	0.85621	0.692606	0.740885	0.841217	0.827951	0.765798	0.862221	0.726626	0.741818	1	0.978971	0.551546	0.678616	0.686067	0.811984	0.891724	0.936012	0.803774	0.653965	0.840322	0.906063	0.773113	0.866828	0.838473	0.799302	0.694377	0.456858	0.685001	0.557302	0.839616	0.701814	0.700781	0.700256	0.577752	0.8594	0.856671	0.821422	0.7205
K904C30mins	0.909328	0.967734	0.82471	0.896474	0.715677	0.658227	0.700558	0.69908	0.84203	0.712781	0.865856	0.852275	0.688982	0.746914	0.842142	0.833846	0.771177	0.876787	0.702202	0.718831	0.978971	1	0.535218	0.672677	0.693187	0.790999	0.876699	0.947746	0.786901	0.637036	0.823931	0.899974	0.759126	0.871147	0.829214	0.796492	0.694057	0.422734	0.639004	0.534501	0.814711	0.707009	0.698732	0.701123	0.587718	0.846023	0.837022	0.807974	0.71508
K91XDPBS16hrs	0.598483	0.556697	0.675779	0.664256	0.736487	0.780983	0.688747	0.728372	0.587719	0.661725	0.540238	0.58224	0.649878	0.630288	0.552686	0.601325	0.72479	0.554629	0.648862	0.655663	0.551546	0.535218	1	0.697917	0.673426	0.676664	0.615229	0.58303	0.711132	0.794226	0.66843	0.641833	0.73903	0.648486	0.746904	0.671536	0.705459	0.5202	0.632435	0.573249	0.700453	0.654423	0.728316	0.697231	0.683687	0.671826	0.715747	0.688845	0.651388
K91XTSBDC24hrs	0.731475	0.69923	0.810048	0.701546	0.780785	0.806261	0.678799	0.764823	0.683457	0.614302	0.626495	0.676525	0.775086	0.761044	0.662022	0.689448	0.776722	0.648341	0.600601	0.606655	0.678616	0.672677	0.697917	1	0.818318	0.800404	0.622607	0.726191	0.67565	0.871638	0.793366	0.677754	0.68521	0.66406	0.817384	0.684154	0.984708	0.440823	0.636185	0.583281	0.81945	0.829574	0.874951	0.844078	0.796798	0.723303	0.768098	0.670243	0.866863
K91XTSBDCML	0.702437	0.715864	0.774073	0.751758	0.758855	0.766314	0.676719	0.748851	0.762858	0.618577	0.712492	0.745792	0.742912	0.772217	0.736513	0.774139	0.780138	0.721993	0.603494	0.613731	0.686067	0.693187	0.673426	0.818318	1	0.818393	0.703087	0.727304	0.697687	0.810266	0.781477	0.724676	0.709758	0.718825	0.756737	0.664359	0.814929	0.3953	0.565496	0.554853	0.800241	0.985092	0.826749	0.767911	0.737404	0.739491	0.77548	0.684915	0.917171
K928C16hrs	0.834861	0.840823	0.934952	0.87148	0.877428	0.862714	0.75318	0.812611	0.847743	0.761382	0.823121	0.857371	0.761947	0.787847	0.846545	0.858761	0.8523	0.817986	0.751182	0.762313	0.811984	0.790999	0.676664	0.800404	0.818393	1	0.837471	0.830012	0.796069	0.831195	0.949053	0.849849	0.810807	0.830262	0.878892	0.78355	0.802549	0.470201	0.707933	0.621758	0.955732	0.833835	0.78645	0.741662	0.66852	0.864581	0.914338	0.804758	0.877875
K928C30mins	0.835851	0.88292	0.828373	0.959199	0.775058	0.709053	0.70512	0.741363	0.837361	0.825965	0.869752	0.865617	0.712636	0.746225	0.843644	0.835056	0.786384	0.881187	0.815461	0.835552	0.891724	0.876699	0.615229	0.622607	0.703087	0.837471	1	0.87084	0.878185	0.670184	0.839997	0.97054	0.837682	0.93897	0.834943	0.803672	0.636443	0.500459	0.739595	0.613903	0.835505	0.708789	0.682872	0.661848	0.534265	0.876024	0.87266	0.870798	0.714884
K92MNaCl	0.906197	0.922198	0.866453	0.907398	0.737508	0.713454	0.71147	0.709786	0.857259	0.771274	0.870868	0.884319	0.696184	0.767872	0.851524	0.856755	0.800689	0.892542	0.75969	0.776865	0.936012	0.947746	0.58303	0.726191	0.727304	0.830012	0.87084	1	0.79646	0.702939	0.856179	0.91428	0.776319	0.882127	0.86438	0.822152	0.739715	0.468497	0.699572	0.618248	0.84951	0.745082	0.725953	0.71056	0.626592	0.825586	0.859125	0.806524	0.776193
K92MSorbitol	0.796836	0.79356	0.814025	0.898892	0.792342	0.751596	0.71472	0.73546	0.768885	0.820276	0.760035	0.773272	0.68913	0.693643	0.753252	0.764322	0.768729	0.761927	0.80275	0.822526	0.803774	0.786901	0.711132	0.67565	0.697687	0.796069	0.878185	0.79646	1	0.713789	0.811365	0.894074	0.887289	0.900713	0.837927	0.785446	0.692187	0.559644	0.746848	0.591161	0.825086	0.695713	0.751359	0.702386	0.608404	0.890708	0.878758	0.910375	0.687188
K930NHS	0.708155	0.678142	0.808333	0.739805	0.838212	0.880373	0.710568	0.80963	0.723494	0.665814	0.668388	0.720403	0.762246	0.737803	0.698358	0.737244	0.811128	0.659482	0.653655	0.660233	0.653965	0.637036	0.794226	0.871638	0.810266	0.831195	0.670184	0.702939	0.713789	1	0.80462	0.709897	0.725611	0.707438	0.831785	0.698692	0.877295	0.456026	0.648678	0.569446	0.823765	0.816022	0.805063	0.808023	0.766198	0.731298	0.776454	0.704164	0.823223
K937C16hrs	0.857995	0.857117	0.985496	0.897103	0.87262	0.858792	0.758413	0.796015	0.832093	0.785508	0.806186	0.836168	0.731662	0.757696	0.814765	0.839385	0.849339	0.819969	0.777273	0.786916	0.840322	0.823931	0.66843	0.793366	0.781477	0.949053	0.839997	0.856179	0.811365	0.80462	1	0.876934	0.865827	0.867972	0.916633	0.849851	0.807145	0.524701	0.761089	0.634687	0.959218	0.800266	0.795587	0.725461	0.641538	0.891389	0.944748	0.852893	0.843046
K937C30mins	0.872877	0.892684	0.874214	0.984759	0.796345	0.752808	0.735875	0.753162	0.848212	0.837609	0.857127	0.864563	0.700051	0.743786	0.832036	0.84587	0.812311	0.875863	0.82764	0.845957	0.906063	0.899974	0.641833	0.677754	0.724676	0.849849	0.97054	0.91428	0.894074	0.709897	0.876934	1	0.870527	0.976189	0.881736	0.84259	0.696856	0.527121	0.763215	0.622765	0.8671	0.73532	0.726385	0.690132	0.582674	0.889173	0.902028	0.89782	0.742693
K942C16hrs	0.77935	0.769672	0.861255	0.88615	0.812629	0.77713	0.73683	0.746105	0.753457	0.838838	0.733146	0.751209	0.68417	0.68272	0.725704	0.756061	0.795034	0.756979	0.824593	0.83785	0.773113	0.759126	0.73903	0.68521	0.709758	0.810807	0.837682	0.776319	0.887289	0.725611	0.865827	0.870527	1	0.898382	0.855407	0.825839	0.701133	0.610027	0.775994	0.656734	0.842661	0.71622	0.787048	0.666191	0.586242	0.912757	0.91719	0.940358	0.710003
K942C30mins	0.826417	0.854209	0.857545	0.977026	0.790865	0.742033	0.728813	0.751435	0.828792	0.822249	0.829194	0.830873	0.678043	0.706879	0.802291	0.822663	0.807778	0.847283	0.809131	0.827966	0.866828	0.871147	0.648486	0.66406	0.718825	0.830262	0.93897	0.882127	0.900713	0.707438	0.867972	0.976189	0.898382	1	0.86696	0.83043	0.687561	0.512879	0.730535	0.603877	0.847867	0.727488	0.729375	0.674177	0.565672	0.899914	0.896499	0.924686	0.713821
K9Aer1wk	0.850176	0.831845	0.928237	0.88579	0.868037	0.861903	0.810103	0.834539	0.807002	0.81475	0.786825	0.813615	0.745163	0.756695	0.783974	0.808761	0.875716	0.798651	0.805958	0.814298	0.838473	0.829214	0.746904	0.817384	0.756737	0.878892	0.834943	0.86438	0.837927	0.831785	0.916633	0.881736	0.855407	0.86696	1	0.919824	0.832018	0.584122	0.812144	0.625956	0.911025	0.766938	0.830693	0.764926	0.680043	0.879896	0.91165	0.862594	0.789859
K9Aer2wks	0.793065	0.778712	0.855686	0.833325	0.758329	0.753701	0.7841	0.724485	0.74075	0.773592	0.733344	0.750155	0.636592	0.670599	0.711807	0.745614	0.797745	0.765296	0.764342	0.775499	0.799302	0.796492	0.671536	0.684154	0.664359	0.78355	0.803672	0.822152	0.785446	0.698692	0.849851	0.84259	0.825839	0.83043	0.919824	1	0.689663	0.635133	0.765927	0.630016	0.812955	0.666975	0.751622	0.625423	0.552191	0.812852	0.840739	0.803916	0.694499
K9Al3+24hrs	0.738455	0.712823	0.819773	0.72072	0.794413	0.815593	0.690156	0.783455	0.696969	0.622721	0.637442	0.681263	0.780182	0.764087	0.66948	0.700528	0.78896	0.660987	0.60916	0.614629	0.694377	0.694057	0.705459	0.984708	0.814929	0.802549	0.636443	0.739715	0.692187	0.877295	0.807145	0.696856	0.701133	0.687561	0.832018	0.689663	1	0.41781	0.632153	0.568467	0.826631	0.82765	0.875583	0.859579	0.808476	0.742621	0.783209	0.695086	0.860955
K9Anaer1wk	0.52174	0.44026	0.55268	0.513586	0.504829	0.531299	0.441266	0.3929	0.40064	0.594575	0.392387	0.42644	0.372906	0.389034	0.36621	0.420102	0.444651	0.431066	0.595366	0.592296	0.456858	0.422734	0.5202	0.440823	0.3953	0.470201	0.500459	0.468497	0.559644	0.456026	0.524701	0.527121	0.610027	0.512879	0.584122	0.635133	0.41781	1	0.755329	0.576895	0.510272	0.39028	0.477738	0.342073	0.322806	0.512352	0.543342	0.541909	0.420783
K9Anaer2wks	0.729355	0.674344	0.791406	0.757503	0.720133	0.699038	0.595754	0.599922	0.601137	0.821022	0.621815	0.659632	0.602251	0.591748	0.603089	0.611037	0.641618	0.638146	0.828959	0.827449	0.685001	0.639004	0.632435	0.636185	0.565496	0.707933	0.739595	0.699572	0.746848	0.648678	0.761089	0.763215	0.775994	0.730535	0.812144	0.765927	0.632153	0.755329	1	0.68138	0.764883	0.582082	0.663141	0.574791	0.483006	0.75087	0.783288	0.766668	0.629488
K9BALBcLungs	0.608324	0.553364	0.649503	0.622705	0.587602	0.590556	0.516249	0.515934	0.550409	0.715404	0.552497	0.597893	0.570107	0.593656	0.542825	0.569485	0.575715	0.593527	0.712027	0.709713	0.557302	0.534501	0.573249	0.583281	0.554853	0.621758	0.613903	0.618248	0.591161	0.569446	0.634687	0.622765	0.656734	0.603877	0.625956	0.630016	0.568467	0.576895	0.68138	1	0.61957	0.55499	0.603197	0.504987	0.471701	0.583382	0.633448	0.588433	0.629674
K9Bleach	0.875838	0.860503	0.961143	0.887103	0.891018	0.877378	0.76347	0.814027	0.833109	0.783706	0.802632	0.83637	0.757625	0.779626	0.824442	0.840394	0.861014	0.801903	0.77614	0.783629	0.839616	0.814711	0.700453	0.81945	0.800241	0.955732	0.835505	0.84951	0.825086	0.823765	0.959218	0.8671	0.842661	0.847867	0.911025	0.812955	0.826631	0.510272	0.764883	0.61957	1	0.81701	0.809458	0.765081	0.691119	0.901189	0.96675	0.849453	0.860793
K9Ca2+ML	0.72057	0.735527	0.794837	0.763499	0.765446	0.767051	0.670245	0.746422	0.768135	0.623801	0.720771	0.754967	0.745555	0.772912	0.745744	0.778083	0.778018	0.728672	0.608948	0.61981	0.701814	0.707009	0.654423	0.829574	0.985092	0.833835	0.708789	0.745082	0.695713	0.816022	0.800266	0.73532	0.71622	0.727488	0.766938	0.666975	0.82765	0.39028	0.582082	0.55499	0.81701	1	0.821526	0.766269	0.734717	0.752916	0.787442	0.694398	0.937138
K9Cd2+24hrs	0.723101	0.707912	0.804486	0.748769	0.788278	0.782467	0.713661	0.763672	0.693064	0.687237	0.651151	0.68656	0.750843	0.731157	0.67222	0.697829	0.790136	0.6759	0.673189	0.68073	0.700781	0.698732	0.728316	0.874951	0.826749	0.78645	0.682872	0.725953	0.751359	0.805063	0.795587	0.726385	0.787048	0.729375	0.830693	0.751622	0.875583	0.477738	0.663141	0.603197	0.809458	0.821526	1	0.790622	0.724042	0.792035	0.808184	0.762404	0.811094
K9CDMES	0.700926	0.710232	0.73103	0.706567	0.731511	0.728251	0.655316	0.745444	0.700913	0.595043	0.665718	0.682157	0.82339	0.818228	0.687443	0.696483	0.7395	0.659496	0.576852	0.590226	0.700256	0.701123	0.697231	0.844078	0.767911	0.741662	0.661848	0.71056	0.702386	0.808023	0.725461	0.690132	0.666191	0.674177	0.764926	0.625423	0.859579	0.342073	0.574791	0.504987	0.765081	0.766269	0.790622	1	0.927745	0.724249	0.743901	0.677747	0.771234
K9CDMML	0.621802	0.596328	0.651892	0.600391	0.665588	0.7006	0.626931	0.666883	0.631544	0.50632	0.561759	0.591261	0.730913	0.770141	0.59492	0.633075	0.674306	0.567549	0.485231	0.499178	0.577752	0.587718	0.683687	0.796798	0.737404	0.66852	0.534265	0.626592	0.608404	0.766198	0.641538	0.582674	0.586242	0.565672	0.680043	0.552191	0.808476	0.322806	0.483006	0.471701	0.691119	0.734717	0.724042	0.927745	1	0.603295	0.662952	0.561432	0.753046
K9Ceft	0.835394	0.866534	0.888611	0.909127	0.857593	0.783376	0.733232	0.785555	0.814019	0.803292	0.810896	0.811043	0.747006	0.725825	0.814666	0.807705	0.818566	0.808085	0.788248	0.800025	0.8594	0.846023	0.671826	0.723303	0.739491	0.864581	0.876024	0.825586	0.890708	0.731298	0.891389	0.889173	0.912757	0.899914	0.879896	0.812852	0.742621	0.512352	0.75087	0.583382	0.901189	0.752916	0.792035	0.724249	0.603295	1	0.950221	0.954439	0.750817
K9ChemRef	0.875217	0.865205	0.94609	0.920262	0.882165	0.848996	0.769755	0.808053	0.838092	0.831	0.814997	0.835271	0.745175	0.762031	0.823026	0.840414	0.858728	0.82207	0.820294	0.830432	0.856671	0.837022	0.715747	0.768098	0.77548	0.914338	0.87266	0.859125	0.878758	0.776454	0.944748	0.902028	0.91719	0.896499	0.91165	0.840739	0.783209	0.543342	0.783288	0.633448	0.96675	0.787442	0.808184	0.743901	0.662952	0.950221	1	0.923681	0.815527
K9Chlamp	0.802258	0.81309	0.851362	0.911687	0.816524	0.757416	0.709141	0.751186	0.766545	0.836989	0.766415	0.770451	0.687005	0.671791	0.754962	0.761586	0.787414	0.777077	0.822839	0.835407	0.821422	0.807974	0.688845	0.670243	0.684915	0.804758	0.870798	0.806524	0.910375	0.704164	0.852893	0.89782	0.940358	0.924686	0.862594	0.803916	0.695086	0.541909	0.766668	0.588433	0.849453	0.694398	0.762404	0.677747	0.561432	0.954439	0.923681	1	0.680089
K9Cu2+ML	0.76886	0.755911	0.842682	0.765038	0.790662	0.80131	0.691823	0.751767	0.788668	0.66599	0.735694	0.784138	0.776646	0.81803	0.769528	0.803633	0.796882	0.752656	0.653669	0.661139	0.7205	0.71508	0.651388	0.866863	0.917171	0.877875	0.714884	0.776193	0.687188	0.823223	0.843046	0.742693	0.710003	0.713821	0.789859	0.694499	0.860955	0.420783	0.629488	0.629674	0.860793	0.937138	0.811094	0.771234	0.753046	0.750817	0.815527	0.680089	1
K9Des24hrs	0.864233	0.803719	0.825406	0.817031	0.702483	0.73533	0.692346	0.656616	0.782669	0.740056	0.764428	0.800826	0.642244	0.727627	0.75664	0.794236	0.754499	0.792408	0.732427	0.745509	0.814507	0.809193	0.605714	0.694888	0.685826	0.785734	0.77489	0.895898	0.737226	0.704336	0.809169	0.822827	0.72655	0.783404	0.822158	0.799337	0.697419	0.584898	0.697721	0.68029	0.806586	0.693208	0.676574	0.648854	0.628848	0.726942	0.800765	0.715654	0.750479
K9DesRef	0.841384	0.779088	0.811501	0.798711	0.729395	0.767211	0.689659	0.651641	0.747671	0.715583	0.721147	0.757331	0.628341	0.708462	0.717845	0.760707	0.747774	0.750323	0.708335	0.720433	0.788526	0.778075	0.662594	0.707496	0.687589	0.767528	0.743809	0.852232	0.744445	0.712676	0.791034	0.794274	0.73624	0.759837	0.819514	0.797222	0.706464	0.623366	0.698148	0.64191	0.80847	0.689949	0.69837	0.660134	0.660383	0.732455	0.811111	0.726061	0.73586
K9Fe3+24hrs	0.714257	0.709267	0.776549	0.714009	0.791162	0.808268	0.678784	0.78551	0.698179	0.633278	0.658276	0.687926	0.763549	0.74181	0.678884	0.69665	0.773152	0.659116	0.617445	0.630782	0.695893	0.68699	0.775109	0.85565	0.747144	0.778087	0.662242	0.721961	0.706164	0.878647	0.763477	0.697716	0.681363	0.683567	0.823591	0.68494	0.867952	0.413852	0.625035	0.511654	0.797512	0.753272	0.775374	0.840288	0.776064	0.728592	0.757671	0.698628	0.755883
K9Fe3+ML	0.729797	0.748694	0.793152	0.786332	0.768695	0.762195	0.693056	0.767707	0.781655	0.647609	0.740886	0.77173	0.737013	0.754826	0.766233	0.790736	0.791937	0.741816	0.631814	0.642735	0.720374	0.723047	0.686686	0.804006	0.973749	0.827283	0.734098	0.751752	0.739221	0.807858	0.798772	0.755371	0.743627	0.755941	0.777586	0.678791	0.804761	0.399246	0.596878	0.543365	0.81906	0.961453	0.829853	0.760081	0.714624	0.781755	0.804499	0.736573	0.882556
K9H2O1hr	0.593381	0.556053	0.593513	0.62742	0.600922	0.663378	0.633918	0.563397	0.573341	0.522101	0.520289	0.553354	0.517579	0.558907	0.526422	0.587752	0.590201	0.517732	0.506393	0.517682	0.548345	0.555362	0.711687	0.586339	0.640948	0.603764	0.553558	0.606569	0.642753	0.67943	0.586373	0.613677	0.619129	0.620111	0.635703	0.578704	0.604056	0.39442	0.479543	0.437446	0.622896	0.62609	0.608301	0.668098	0.731816	0.588485	0.630064	0.600397	0.602172
K9H2O1hrref	0.818254	0.85031	0.809227	0.881219	0.7261	0.728437	0.726235	0.733289	0.86367	0.697757	0.836845	0.845982	0.6781	0.764248	0.818032	0.864775	0.811703	0.858948	0.681725	0.704526	0.853011	0.880094	0.614971	0.702537	0.782859	0.816387	0.840314	0.906584	0.785112	0.722468	0.824638	0.884993	0.756666	0.873191	0.822884	0.786962	0.722371	0.4434	0.590179	0.554139	0.801071	0.78101	0.720443	0.721976	0.66774	0.772149	0.809363	0.763669	0.774779
K9H2O210mins	0.759085	0.780614	0.844171	0.849169	0.90432	0.844699	0.734865	0.841404	0.809947	0.746708	0.78456	0.800608	0.795288	0.769038	0.807313	0.806703	0.849411	0.776635	0.728963	0.741247	0.767826	0.752683	0.70741	0.777061	0.767957	0.859839	0.817279	0.760733	0.816279	0.825347	0.850933	0.824828	0.814497	0.819146	0.850825	0.739554	0.7886	0.445997	0.690698	0.565618	0.869686	0.774047	0.784485	0.767541	0.668989	0.86712	0.86342	0.82553	0.779216
K9H2O24hr	0.535158	0.480453	0.590452	0.586166	0.638923	0.710934	0.668141	0.666132	0.541773	0.603441	0.489727	0.525409	0.6064	0.596883	0.493491	0.556051	0.659632	0.504836	0.588083	0.594406	0.481486	0.474859	0.876347	0.640294	0.631144	0.599812	0.541714	0.525957	0.651603	0.740418	0.586918	0.579269	0.66278	0.587131	0.669404	0.603736	0.653797	0.486481	0.552378	0.519647	0.617811	0.60656	0.664853	0.666672	0.678115	0.58809	0.631281	0.623663	0.607306
K9H2O24hrref	0.704132	0.69504	0.792557	0.731414	0.816638	0.837685	0.729543	0.84063	0.718073	0.632891	0.669543	0.709587	0.763912	0.726352	0.699214	0.72702	0.81633	0.659399	0.618352	0.623912	0.676623	0.667197	0.796365	0.879855	0.785774	0.808705	0.665879	0.703186	0.70411	0.938558	0.789242	0.70386	0.713568	0.702949	0.833792	0.688218	0.891247	0.397489	0.613764	0.534101	0.806187	0.790049	0.811466	0.836363	0.772615	0.737501	0.766118	0.703938	0.789879
K9H2O2ref	0.746707	0.721248	0.820875	0.78411	0.881745	0.898739	0.772817	0.863953	0.775746	0.693894	0.714233	0.746187	0.763966	0.754486	0.745327	0.783899	0.8605	0.708215	0.676238	0.683326	0.712729	0.701687	0.763079	0.817452	0.788518	0.844398	0.73528	0.716688	0.767683	0.879271	0.825629	0.765602	0.758346	0.75386	0.849667	0.732967	0.83325	0.450899	0.629584	0.532112	0.855414	0.780968	0.794354	0.797596	0.741575	0.790822	0.825019	0.755322	0.790414
K9Insulin	0.636879	0.608034	0.730764	0.704203	0.785708	0.823581	0.695343	0.781496	0.656378	0.674949	0.614717	0.66164	0.723356	0.699592	0.631365	0.66961	0.76232	0.608277	0.664194	0.672101	0.591691	0.573882	0.896958	0.781416	0.755672	0.758858	0.655638	0.637425	0.713258	0.887986	0.723183	0.680991	0.717746	0.678372	0.781627	0.660007	0.779321	0.465826	0.644987	0.576518	0.757496	0.749981	0.756797	0.770307	0.730597	0.690223	0.737237	0.682744	0.745457
K9LBES	0.677245	0.692346	0.763618	0.725911	0.80052	0.785193	0.701467	0.788773	0.72659	0.608382	0.682514	0.700142	0.727828	0.702955	0.713311	0.723032	0.79058	0.642826	0.590152	0.598794	0.676063	0.669075	0.729788	0.774648	0.749194	0.792759	0.661254	0.683947	0.710945	0.831256	0.760889	0.691199	0.701526	0.694676	0.784902	0.646384	0.791839	0.324065	0.564264	0.445672	0.808335	0.759318	0.757316	0.858862	0.819468	0.761515	0.783437	0.707825	0.744415
K9LBML	0.644619	0.654444	0.681266	0.677446	0.70653	0.726216	0.683043	0.695714	0.718081	0.526437	0.660263	0.677035	0.654642	0.701582	0.68655	0.721301	0.708202	0.632331	0.502444	0.521392	0.629132	0.640443	0.681108	0.684872	0.746766	0.737132	0.620208	0.671121	0.660343	0.763858	0.683528	0.656159	0.622241	0.64598	0.695897	0.593079	0.703223	0.303875	0.46055	0.40986	0.730235	0.745658	0.669132	0.804423	0.846107	0.658054	0.705352	0.610049	0.723115
K9LBS	0.665281	0.692953	0.734239	0.722612	0.773632	0.753255	0.698086	0.773788	0.729313	0.609879	0.697968	0.703542	0.724634	0.717146	0.714752	0.722336	0.782198	0.666363	0.589516	0.603952	0.684345	0.684305	0.725525	0.720338	0.712921	0.758214	0.679976	0.691861	0.715349	0.79243	0.734258	0.698866	0.690668	0.696451	0.775776	0.655564	0.742235	0.328323	0.553013	0.437396	0.774012	0.717812	0.719985	0.848305	0.804037	0.743146	0.76294	0.701358	0.701121
K9Mg2+ML	0.767184	0.787079	0.845912	0.791861	0.792961	0.779635	0.671935	0.748013	0.795475	0.659914	0.759426	0.795504	0.780247	0.808555	0.789114	0.806367	0.783267	0.767454	0.648047	0.658654	0.74481	0.737698	0.632145	0.846082	0.908563	0.889537	0.744713	0.781289	0.706486	0.813652	0.852721	0.763511	0.723562	0.743227	0.789561	0.687256	0.841901	0.393873	0.637181	0.593781	0.870895	0.93939	0.795666	0.769663	0.726397	0.787305	0.82834	0.711935	0.972447
K9MHB	0.863779	0.855544	0.95147	0.89359	0.880776	0.871117	0.774459	0.820426	0.828797	0.770303	0.78441	0.806739	0.736722	0.753591	0.800024	0.827852	0.858213	0.791334	0.757372	0.767229	0.844703	0.836995	0.700985	0.813183	0.784916	0.916859	0.827416	0.848743	0.843949	0.81386	0.954381	0.877919	0.870186	0.876175	0.927813	0.834325	0.836666	0.509614	0.729556	0.569962	0.955632	0.798708	0.816532	0.778092	0.702884	0.926783	0.958677	0.894616	0.823086
K9Mn2+ML	0.724479	0.730477	0.794213	0.756999	0.765142	0.77861	0.681073	0.747526	0.774482	0.624254	0.721527	0.758768	0.740423	0.775884	0.748698	0.785801	0.786594	0.728818	0.608951	0.620022	0.698857	0.702382	0.661486	0.823282	0.987376	0.834469	0.705903	0.745882	0.691296	0.816649	0.799211	0.731453	0.708491	0.718049	0.767592	0.678162	0.819349	0.40219	0.576662	0.563419	0.816233	0.988371	0.81974	0.759709	0.736794	0.739101	0.784798	0.679735	0.939168
K9Na2SO4ES	0.718095	0.740572	0.736405	0.733277	0.733922	0.7094	0.652452	0.734292	0.736195	0.661272	0.717984	0.732648	0.845678	0.863737	0.725049	0.73496	0.748586	0.756658	0.645302	0.665092	0.728006	0.736286	0.674899	0.792108	0.769563	0.758503	0.722908	0.75213	0.711463	0.715301	0.738237	0.729984	0.693001	0.701944	0.763751	0.675662	0.797766	0.418968	0.636232	0.615766	0.769803	0.767517	0.774272	0.823677	0.752732	0.735265	0.75775	0.689266	0.795059
K9Na2SO4ML	0.709531	0.72544	0.731445	0.703021	0.727085	0.713128	0.655021	0.751324	0.73015	0.616387	0.695966	0.717772	0.848432	0.874617	0.720256	0.730679	0.749659	0.720386	0.599454	0.616123	0.703374	0.710049	0.666057	0.834593	0.801351	0.763592	0.679416	0.727477	0.682735	0.744075	0.731682	0.692253	0.658914	0.663191	0.753765	0.632188	0.836956	0.363321	0.588842	0.567261	0.777037	0.800394	0.784909	0.869459	0.815654	0.715127	0.747896	0.655682	0.830024
K9Ni2+24hrs	0.731715	0.692702	0.819222	0.715566	0.785463	0.813264	0.685223	0.752652	0.671211	0.646255	0.62065	0.671587	0.761381	0.754951	0.645859	0.680273	0.772772	0.659663	0.635311	0.642118	0.67795	0.669307	0.719513	0.959465	0.788401	0.801473	0.641103	0.730986	0.687672	0.851111	0.805219	0.696159	0.718543	0.683464	0.823265	0.712703	0.953554	0.477581	0.667353	0.633353	0.813853	0.798307	0.86192	0.802544	0.762011	0.728902	0.776549	0.693565	0.849489
K9OsmRef	0.872221	0.845466	0.976797	0.888471	0.877516	0.873298	0.777759	0.80284	0.838745	0.8017	0.799354	0.835615	0.728076	0.763028	0.815028	0.845774	0.862498	0.819454	0.791066	0.798089	0.83417	0.820376	0.689702	0.805749	0.788372	0.93559	0.83033	0.867887	0.821472	0.803382	0.97404	0.875539	0.854818	0.858225	0.920063	0.850105	0.817786	0.548546	0.760159	0.648904	0.962604	0.801022	0.803152	0.73434	0.669964	0.887564	0.953781	0.850951	0.853326
K9Pb2+24hrs	0.739233	0.694784	0.807979	0.711496	0.770103	0.799617	0.674387	0.749022	0.675889	0.634614	0.622135	0.672668	0.759407	0.751104	0.648946	0.684443	0.766155	0.653012	0.622993	0.627317	0.681391	0.677847	0.693752	0.971298	0.826844	0.780376	0.629981	0.735591	0.685203	0.856673	0.790396	0.69077	0.694901	0.676313	0.819684	0.69789	0.969964	0.473791	0.659536	0.607343	0.806632	0.830011	0.882478	0.825763	0.778112	0.720823	0.766743	0.681559	0.852802
K9Plate	0.714042	0.69356	0.790498	0.735738	0.815321	0.835199	0.705897	0.813244	0.712701	0.677266	0.670704	0.71613	0.771471	0.726434	0.699974	0.719063	0.804633	0.652111	0.664042	0.67106	0.679631	0.663611	0.817879	0.868945	0.775423	0.800948	0.675937	0.708252	0.727835	0.927399	0.777115	0.71339	0.721096	0.705833	0.839681	0.689585	0.872526	0.428385	0.664464	0.535811	0.813669	0.782481	0.803409	0.829026	0.755578	0.746595	0.773907	0.716481	0.783277
K9Revived	0.815029	0.739355	0.806618	0.779244	0.728767	0.775686	0.674189	0.639022	0.720359	0.725833	0.692454	0.735683	0.622223	0.695588	0.688864	0.738093	0.736327	0.724913	0.721522	0.731906	0.744981	0.725585	0.681574	0.686226	0.675082	0.766612	0.728905	0.81373	0.725181	0.713945	0.788036	0.770587	0.74132	0.738071	0.800246	0.78313	0.681989	0.63216	0.71156	0.69751	0.798313	0.675066	0.6819	0.624759	0.628217	0.712927	0.797358	0.707884	0.73032
K9TaurineES	0.710151	0.744843	0.727772	0.739741	0.731868	0.700258	0.646127	0.73403	0.737068	0.654504	0.724853	0.733627	0.844626	0.85801	0.729333	0.733979	0.743771	0.756376	0.637971	0.65891	0.731373	0.740197	0.670994	0.779169	0.782415	0.754567	0.73113	0.748343	0.718192	0.710071	0.732232	0.734191	0.696837	0.709793	0.756882	0.666589	0.785989	0.402225	0.627164	0.597888	0.764858	0.778863	0.776284	0.825252	0.746449	0.744309	0.757461	0.69757	0.784398
K9TaurineML	0.712962	0.729653	0.729229	0.710136	0.721043	0.708445	0.650668	0.743001	0.731992	0.619748	0.702099	0.723013	0.844982	0.875113	0.722607	0.732655	0.745469	0.726535	0.602836	0.621428	0.707449	0.71491	0.670445	0.829836	0.805819	0.759543	0.686388	0.736257	0.688671	0.745933	0.728397	0.699855	0.663091	0.670835	0.753588	0.633949	0.831147	0.370579	0.595628	0.574547	0.772382	0.804823	0.782805	0.866842	0.816358	0.712905	0.746235	0.658756	0.823812
K9UV10mins	0.865672	0.919245	0.815194	0.939391	0.748561	0.697619	0.712956	0.732051	0.843351	0.768798	0.865073	0.852024	0.693395	0.745668	0.83421	0.838633	0.785519	0.873766	0.761143	0.779742	0.924121	0.927727	0.592817	0.631781	0.704499	0.823299	0.952149	0.898764	0.851263	0.657014	0.827709	0.94818	0.812786	0.92402	0.827639	0.797463	0.649109	0.465046	0.672953	0.558354	0.83108	0.708337	0.690813	0.679119	0.558529	0.864301	0.865266	0.851697	0.707872
K9UV10minsref	0.880477	0.930436	0.839311	0.94918	0.772597	0.72417	0.729732	0.74997	0.855097	0.78463	0.877685	0.874449	0.711504	0.760648	0.854252	0.857205	0.800906	0.890816	0.776491	0.794043	0.926273	0.923825	0.623534	0.653534	0.731427	0.85068	0.961333	0.907582	0.854724	0.691221	0.848844	0.953614	0.82778	0.924272	0.840468	0.807474	0.667097	0.481336	0.697813	0.586055	0.854266	0.737765	0.708859	0.683826	0.567559	0.877252	0.882273	0.859419	0.740515
K9UV1hr	0.880331	0.889456	0.82773	0.921371	0.765927	0.717961	0.715771	0.735625	0.814818	0.814712	0.83148	0.83612	0.694731	0.733909	0.814834	0.813494	0.784545	0.839376	0.811146	0.825582	0.898991	0.876171	0.613664	0.64556	0.678751	0.830438	0.939744	0.868281	0.870094	0.667243	0.829017	0.929804	0.826568	0.896157	0.842405	0.796684	0.656574	0.51582	0.735474	0.595338	0.851342	0.681749	0.703105	0.669305	0.552846	0.868268	0.884461	0.866134	0.7027
K9UV1hrref	0.8638	0.896441	0.813512	0.928681	0.749938	0.697063	0.722887	0.737235	0.830023	0.786879	0.849175	0.846468	0.686492	0.727499	0.832476	0.827074	0.77919	0.852931	0.779595	0.796059	0.900585	0.883376	0.602784	0.612792	0.688731	0.827099	0.958743	0.863225	0.861969	0.650285	0.820059	0.939302	0.811689	0.904353	0.823831	0.789697	0.627958	0.466081	0.691469	0.555398	0.839717	0.689729	0.676704	0.662617	0.54067	0.866763	0.87377	0.854787	0.695157
K9Zn2+ML	0.808197	0.79029	0.871407	0.814783	0.807685	0.820261	0.706811	0.761132	0.805376	0.706295	0.760679	0.813356	0.766092	0.805179	0.788354	0.821302	0.810573	0.774848	0.694898	0.704629	0.758551	0.746619	0.679694	0.863143	0.925114	0.894318	0.759733	0.813734	0.736858	0.849243	0.868075	0.792262	0.753026	0.765054	0.823385	0.727327	0.858848	0.456466	0.68	0.639325	0.884809	0.944983	0.826799	0.76902	0.73543	0.781773	0.845223	0.727946	0.979915
K9pH4	0.61904	0.564046	0.635853	0.629764	0.668628	0.720743	0.654577	0.621327	0.528972	0.590465	0.477688	0.509381	0.538342	0.537009	0.488688	0.542441	0.624601	0.486194	0.574688	0.578219	0.567571	0.553474	0.817067	0.620877	0.600212	0.611093	0.567693	0.57033	0.700351	0.684391	0.621712	0.618785	0.708542	0.631158	0.696462	0.634757	0.644021	0.511578	0.580331	0.471566	0.663365	0.580576	0.656341	0.643557	0.652652	0.67571	0.694523	0.704396	0.575351
K9pH7	0.742103	0.670494	0.755154	0.737099	0.729861	0.791704	0.711866	0.691053	0.634441	0.70587	0.601425	0.647364	0.625554	0.654102	0.602071	0.65403	0.72036	0.624422	0.69693	0.705944	0.674816	0.653223	0.873106	0.692902	0.668019	0.72611	0.684676	0.709063	0.744292	0.75605	0.738456	0.730017	0.760727	0.713868	0.802175	0.750651	0.699384	0.591668	0.701988	0.614961	0.761844	0.654861	0.71241	0.666093	0.651012	0.709771	0.769164	0.730585	0.677836
[truncated: 33 more columns]

## Sheet: (E) Correlation Matrix (Chr2)
(E) Correlation matrix based on gene expression from Bp Chromosome 2 across all conditions.
Array Name	AL3004C16hrs	AL3004C30mins	AL3037C16hrs	AL3037C30mins	AL30H2O210mins	AL30H2O2ref	Bp008	Bp008pmlITc	Bp22BprC	Bp22BprCRAW	Bp22BprP	Bp22bsaN	Bp22CDMES	Bp22CDMML	Bp22LB3hr	Bp22LB4hr	Bp22LBES	Bp22LBML	Bp22RAW	Bp22VirAGRAW	K904C16hrs	K904C30mins	K91XDPBS16hrs	K91XTSBDC24hrs	K91XTSBDCML	K928C16hrs	K928C30mins	K92MNaCl	K92MSorbitol	K930NHS	K937C16hrs	K937C30mins	K942C16hrs	K942C30mins	K9Aer1wk	K9Aer2wks	K9Al3+24hrs	K9Anaer1wk	K9Anaer2wks	K9BALBcLungs	K9Bleach	K9Ca2+ML	K9Cd2+24hrs	K9CDMES	K9CDMML	K9Ceft	K9ChemRef	K9Chlamp	K9Cu2+ML
AL3004C16hrs	1	0.94074	0.836116	0.839086	0.686865	0.690414	0.66185	0.604466	0.778473	0.580096	0.756441	0.771101	0.532582	0.645789	0.749755	0.784719	0.681788	0.819813	0.568582	0.601922	0.915019	0.892981	0.41128	0.591834	0.658585	0.75975	0.795388	0.886883	0.667689	0.562584	0.814522	0.818473	0.64573	0.755217	0.756299	0.684355	0.585953	0.343849	0.521795	0.439968	0.807042	0.697863	0.606036	0.535837	0.528829	0.803762	0.846328	0.682889	0.766888
AL3004C30mins	0.94074	1	0.805844	0.863194	0.679576	0.646231	0.652034	0.610287	0.801198	0.57356	0.792926	0.7941	0.563214	0.669569	0.802323	0.798612	0.670134	0.866401	0.559914	0.596497	0.947947	0.953237	0.377066	0.556602	0.667498	0.766881	0.845872	0.903739	0.701202	0.539695	0.802841	0.840569	0.656991	0.798921	0.733159	0.663504	0.554842	0.278556	0.484199	0.415786	0.797747	0.714773	0.611123	0.536076	0.525742	0.854745	0.843908	0.727525	0.756285
AL3037C16hrs	0.836116	0.805844	1	0.819364	0.838685	0.849273	0.73328	0.727761	0.792225	0.594488	0.774977	0.763154	0.571478	0.64074	0.724801	0.798968	0.809195	0.773417	0.59034	0.616567	0.757358	0.764881	0.492626	0.70901	0.710173	0.877588	0.724817	0.794871	0.659656	0.712846	0.979754	0.78295	0.700588	0.75312	0.900082	0.79189	0.717746	0.364943	0.5683	0.357566	0.936958	0.738992	0.682616	0.624855	0.544503	0.811224	0.93318	0.705968	0.808886
AL3037C30mins	0.839086	0.863194	0.819364	1	0.75599	0.716495	0.634454	0.626863	0.811962	0.678585	0.823306	0.810308	0.547948	0.6441	0.770811	0.811149	0.736125	0.848464	0.66444	0.705797	0.869683	0.867413	0.45651	0.555468	0.676555	0.764805	0.945405	0.877847	0.800474	0.58859	0.825583	0.975993	0.756575	0.947865	0.771056	0.707015	0.567047	0.336402	0.564449	0.443675	0.809916	0.706777	0.636164	0.549188	0.512287	0.843061	0.884013	0.829913	0.732179
AL30H2O210mins	0.686865	0.679576	0.838685	0.75599	1	0.951653	0.679706	0.780018	0.73318	0.53365	0.704267	0.683436	0.654333	0.648279	0.666314	0.732219	0.816961	0.666078	0.524735	0.552894	0.627143	0.630233	0.532855	0.719875	0.639841	0.823276	0.657282	0.63719	0.665206	0.793474	0.840142	0.699286	0.629543	0.679572	0.832145	0.647603	0.734998	0.321911	0.524101	0.289988	0.867217	0.653564	0.707811	0.691535	0.589567	0.728022	0.828351	0.669608	0.708704
AL30H2O2ref	0.690414	0.646231	0.849273	0.716495	0.951653	1	0.707815	0.790581	0.74863	0.517842	0.695771	0.694096	0.626476	0.642725	0.665026	0.75389	0.843989	0.6551	0.506332	0.533662	0.603649	0.61382	0.530087	0.747611	0.641494	0.816066	0.609788	0.649316	0.615126	0.835984	0.855259	0.675631	0.565766	0.645062	0.851297	0.67204	0.766295	0.311778	0.483255	0.253176	0.859501	0.64669	0.680887	0.700352	0.608811	0.648786	0.801079	0.600831	0.724316
Bp008	0.66185	0.652034	0.73328	0.634454	0.679706	0.707815	1	0.740136	0.712353	0.513955	0.699556	0.664869	0.575879	0.641125	0.636204	0.711026	0.784933	0.690676	0.499363	0.526954	0.604121	0.630931	0.466528	0.61469	0.564292	0.680036	0.557778	0.625521	0.577029	0.641593	0.730038	0.610038	0.579571	0.589393	0.798026	0.735178	0.619381	0.293847	0.450539	0.255344	0.705768	0.587093	0.601922	0.544255	0.517491	0.655889	0.718954	0.573402	0.648544
Bp008pmlITc	0.604466	0.610287	0.727761	0.626863	0.780018	0.790581	0.740136	1	0.75973	0.441281	0.709588	0.677855	0.728736	0.720295	0.680994	0.744218	0.871722	0.662753	0.423091	0.457738	0.55173	0.58232	0.577265	0.757798	0.637762	0.773869	0.552465	0.578215	0.578087	0.794097	0.743894	0.592155	0.525218	0.586654	0.791682	0.576065	0.778403	0.20464	0.366799	0.236308	0.777505	0.649511	0.636364	0.727033	0.634463	0.627021	0.715111	0.546826	0.682133
Bp22BprC	0.778473	0.801198	0.792225	0.811962	0.73318	0.74863	0.712353	0.75973	1	0.636122	0.926059	0.939952	0.701865	0.772197	0.956704	0.992552	0.878665	0.905589	0.608957	0.655493	0.794685	0.812359	0.421989	0.638572	0.714696	0.794727	0.785371	0.837751	0.68424	0.700223	0.817438	0.808304	0.581036	0.779122	0.756285	0.651442	0.652405	0.231534	0.409778	0.346506	0.79754	0.72913	0.621495	0.646854	0.610027	0.721805	0.79489	0.652989	0.76944
Bp22BprCRAW	0.580096	0.57356	0.594488	0.678585	0.53365	0.517842	0.513955	0.441281	0.636122	1	0.59926	0.633965	0.505366	0.530739	0.632638	0.632614	0.566865	0.655717	0.980556	0.976215	0.613798	0.607706	0.440235	0.395596	0.478457	0.511914	0.686439	0.641424	0.755165	0.444843	0.573416	0.720606	0.735194	0.736343	0.591127	0.565305	0.397153	0.473277	0.659126	0.57819	0.562906	0.492412	0.547508	0.411363	0.412195	0.653609	0.658138	0.754477	0.502588
Bp22BprP	0.756441	0.792926	0.774977	0.823306	0.704267	0.695771	0.699556	0.709588	0.926059	0.59926	1	0.943707	0.641488	0.710018	0.891053	0.925316	0.828921	0.893433	0.585938	0.628198	0.786566	0.801911	0.384298	0.581364	0.655603	0.764703	0.792888	0.811079	0.650484	0.641827	0.800787	0.804967	0.617206	0.783544	0.735938	0.675011	0.594399	0.261622	0.458361	0.315024	0.775949	0.676865	0.572348	0.583268	0.494006	0.741852	0.803263	0.677501	0.706537
Bp22bsaN	0.771101	0.7941	0.763154	0.810308	0.683436	0.694096	0.664869	0.677855	0.939952	0.633965	0.943707	1	0.644255	0.721333	0.945324	0.947792	0.816333	0.899899	0.617111	0.658194	0.802497	0.813129	0.398795	0.583542	0.657213	0.760363	0.799078	0.852719	0.645051	0.653179	0.779622	0.809717	0.58951	0.781674	0.713485	0.633841	0.591721	0.259822	0.446647	0.369787	0.762037	0.675988	0.578598	0.594928	0.554191	0.706759	0.77427	0.652271	0.716317
Bp22CDMES	0.532582	0.563214	0.571478	0.547948	0.654333	0.626476	0.575879	0.728736	0.701865	0.505366	0.641488	0.644255	1	0.92579	0.68574	0.683717	0.723938	0.652508	0.481128	0.512382	0.52925	0.540817	0.495713	0.774645	0.622862	0.628001	0.520957	0.525134	0.570015	0.703631	0.579764	0.535231	0.475802	0.524684	0.599425	0.420472	0.779885	0.209879	0.361928	0.345608	0.632459	0.64025	0.680619	0.859229	0.791739	0.561616	0.585955	0.51068	0.676277
Bp22CDMML	0.645789	0.669569	0.64074	0.6441	0.648279	0.642725	0.641125	0.720295	0.772197	0.530739	0.710018	0.721333	0.92579	1	0.754585	0.762352	0.749867	0.774231	0.504264	0.540064	0.651419	0.664019	0.467278	0.754862	0.692098	0.673493	0.625696	0.662311	0.586172	0.666173	0.651216	0.636193	0.484895	0.59688	0.656241	0.501855	0.761437	0.222696	0.369785	0.381785	0.670155	0.716922	0.666217	0.826283	0.83695	0.598972	0.646567	0.526435	0.774884
Bp22LB3hr	0.749755	0.802323	0.724801	0.770811	0.666314	0.665026	0.636204	0.680994	0.956704	0.632638	0.891053	0.945324	0.68574	0.754585	1	0.954209	0.792338	0.897467	0.602776	0.645444	0.804072	0.817527	0.375246	0.577248	0.679315	0.75898	0.786439	0.842078	0.669473	0.636179	0.745769	0.778783	0.540459	0.746578	0.671354	0.569492	0.585035	0.205291	0.387065	0.376426	0.744295	0.695844	0.582929	0.614394	0.603994	0.696885	0.739668	0.630154	0.729139
Bp22LB4hr	0.784719	0.798612	0.798968	0.811149	0.732219	0.75389	0.711026	0.744218	0.992552	0.632614	0.925316	0.947792	0.683717	0.762352	0.954209	1	0.873666	0.904711	0.608094	0.651692	0.792471	0.806216	0.422647	0.629068	0.712628	0.799694	0.785295	0.840342	0.672915	0.700043	0.82284	0.807626	0.577547	0.773121	0.754709	0.657146	0.643	0.236631	0.412166	0.352431	0.798758	0.724538	0.611242	0.634325	0.601332	0.712464	0.796177	0.644671	0.772954
Bp22LBES	0.681788	0.670134	0.809195	0.736125	0.816961	0.843989	0.784933	0.871722	0.878665	0.566865	0.828921	0.816333	0.723938	0.749867	0.792338	0.873666	1	0.782656	0.550664	0.583817	0.654725	0.672551	0.531997	0.756986	0.67615	0.803902	0.663953	0.698976	0.626117	0.79535	0.827019	0.714865	0.570218	0.690736	0.843356	0.686393	0.773258	0.256641	0.420351	0.286548	0.827949	0.684066	0.685603	0.698945	0.613045	0.657495	0.785095	0.601537	0.736086
Bp22LBML	0.819813	0.866401	0.773417	0.848464	0.666078	0.6551	0.690676	0.662753	0.905589	0.655717	0.893433	0.899899	0.652508	0.774231	0.897467	0.904711	0.782656	1	0.634758	0.67307	0.86322	0.882203	0.378337	0.564868	0.681991	0.73663	0.848812	0.899753	0.667173	0.56014	0.787936	0.848139	0.622307	0.809782	0.725608	0.665338	0.573701	0.279931	0.453521	0.437762	0.745961	0.708923	0.593492	0.551833	0.539184	0.762257	0.795808	0.685035	0.762031
Bp22RAW	0.568582	0.559914	0.59034	0.66444	0.524735	0.506332	0.499363	0.423091	0.608957	0.980556	0.585938	0.617111	0.481128	0.504264	0.602776	0.608094	0.550664	0.634758	1	0.966335	0.595754	0.586808	0.426457	0.380583	0.459358	0.503275	0.669569	0.619533	0.729132	0.42875	0.566754	0.702993	0.732968	0.717027	0.582545	0.558811	0.380059	0.486176	0.67527	0.579897	0.5585	0.475508	0.529023	0.386298	0.380466	0.644573	0.652246	0.742166	0.486882
Bp22VirAGRAW	0.601922	0.596497	0.616567	0.705797	0.552894	0.533662	0.526954	0.457738	0.655493	0.976215	0.628198	0.658194	0.512382	0.540064	0.645444	0.651692	0.583817	0.67307	0.966335	1	0.633327	0.624583	0.444214	0.401768	0.489985	0.534698	0.710297	0.655791	0.765393	0.456962	0.596355	0.744726	0.751651	0.759423	0.610349	0.581004	0.403932	0.476855	0.675537	0.539662	0.587876	0.506606	0.55901	0.418087	0.410714	0.676302	0.683446	0.768706	0.514337
K904C16hrs	0.915019	0.947947	0.757358	0.869683	0.627143	0.603649	0.604121	0.55173	0.794685	0.613798	0.786566	0.802497	0.52925	0.651419	0.804072	0.792471	0.654725	0.86322	0.595754	0.633327	1	0.972089	0.362761	0.510352	0.633464	0.692651	0.882653	0.93133	0.703637	0.49078	0.760344	0.881166	0.650615	0.831651	0.701783	0.676519	0.515143	0.29547	0.490051	0.448233	0.732342	0.668521	0.587008	0.517407	0.513263	0.798823	0.799343	0.726751	0.701822
K904C30mins	0.892981	0.953237	0.764881	0.867413	0.630233	0.61382	0.630931	0.58232	0.812359	0.607706	0.801911	0.813129	0.540817	0.664019	0.817527	0.806216	0.672551	0.882203	0.586808	0.624583	0.972089	1	0.363757	0.524558	0.643769	0.692448	0.868087	0.948994	0.710421	0.50429	0.773951	0.877822	0.651761	0.850535	0.725828	0.69892	0.535648	0.277143	0.466749	0.429868	0.730692	0.678371	0.602789	0.534851	0.528136	0.808533	0.799858	0.739301	0.703152
K91XDPBS16hrs	0.41128	0.377066	0.492626	0.45651	0.532855	0.530087	0.466528	0.577265	0.421989	0.440235	0.384298	0.398795	0.495713	0.467278	0.375246	0.422647	0.531997	0.378337	0.426457	0.444214	0.362761	0.363757	1	0.526503	0.438848	0.468597	0.403874	0.391417	0.55337	0.593277	0.439409	0.447217	0.510539	0.456502	0.59508	0.426114	0.539245	0.283166	0.417168	0.309044	0.488768	0.445194	0.548368	0.523086	0.5009	0.465104	0.506139	0.491285	0.471182
K91XTSBDC24hrs	0.591834	0.556602	0.70901	0.555468	0.719875	0.747611	0.61469	0.757798	0.638572	0.395596	0.581364	0.583542	0.774645	0.754862	0.577248	0.629068	0.756986	0.564868	0.380583	0.401768	0.510352	0.524558	0.526503	1	0.670426	0.71066	0.467877	0.552163	0.499416	0.778144	0.705452	0.529553	0.468323	0.497611	0.740819	0.539036	0.984701	0.282656	0.39892	0.314245	0.739519	0.689217	0.756667	0.844153	0.742479	0.553302	0.662986	0.46473	0.763714
K91XTSBDCML	0.658585	0.667498	0.710173	0.676555	0.639841	0.641494	0.564292	0.637762	0.714696	0.478457	0.655603	0.657213	0.622862	0.692098	0.679315	0.712628	0.67615	0.681991	0.459358	0.489985	0.633464	0.643769	0.438848	0.670426	1	0.723066	0.633188	0.674178	0.601928	0.651478	0.719973	0.654283	0.52538	0.621723	0.65446	0.517245	0.680313	0.199068	0.359933	0.338133	0.718047	0.980585	0.705074	0.660145	0.626251	0.650995	0.702334	0.558408	0.841654
K928C16hrs	0.75975	0.766881	0.877588	0.764805	0.823276	0.816066	0.680036	0.773869	0.794727	0.511914	0.764703	0.760363	0.628001	0.673493	0.75898	0.799694	0.803902	0.73663	0.503275	0.534698	0.692651	0.692448	0.468597	0.71066	0.723066	1	0.709792	0.719161	0.632752	0.749201	0.894069	0.722167	0.600721	0.687427	0.793792	0.626371	0.711737	0.233308	0.432922	0.332217	0.94165	0.750484	0.644606	0.659905	0.582279	0.756462	0.865386	0.631323	0.812159
K928C30mins	0.795388	0.845872	0.724817	0.945405	0.657282	0.609788	0.557778	0.552465	0.785371	0.686439	0.792888	0.799078	0.520957	0.625696	0.786439	0.785295	0.663953	0.848812	0.669569	0.710297	0.882653	0.868087	0.403874	0.467877	0.633188	0.709792	1	0.86746	0.781938	0.502887	0.736541	0.960376	0.701486	0.912486	0.673599	0.64531	0.47611	0.287277	0.509697	0.490672	0.733315	0.657749	0.574357	0.492057	0.470151	0.797139	0.812394	0.790363	0.679522
K92MNaCl	0.886883	0.903739	0.794871	0.877847	0.63719	0.649316	0.625521	0.578215	0.837751	0.641424	0.811079	0.852719	0.525134	0.662311	0.842078	0.840342	0.698976	0.899753	0.619533	0.655791	0.93133	0.948994	0.391417	0.552163	0.674178	0.719161	0.86746	1	0.700395	0.545883	0.792887	0.896696	0.635343	0.854243	0.742087	0.703196	0.559571	0.28918	0.478963	0.473102	0.751896	0.706986	0.598614	0.533123	0.540962	0.769595	0.8081	0.709995	0.749849
K92MSorbitol	0.667689	0.701202	0.659656	0.800474	0.665206	0.615126	0.577029	0.578087	0.68424	0.755165	0.650484	0.645051	0.570015	0.586172	0.669473	0.672915	0.626117	0.667173	0.729132	0.765393	0.703637	0.710421	0.55337	0.499416	0.601928	0.632752	0.781938	0.700395	1	0.560097	0.646523	0.800955	0.788025	0.827341	0.676009	0.584798	0.508543	0.374968	0.584697	0.448653	0.6831	0.619335	0.671519	0.544822	0.529103	0.796993	0.768941	0.858228	0.593609
K930NHS	0.562584	0.539695	0.712846	0.58859	0.793474	0.835984	0.641593	0.794097	0.700223	0.444843	0.641827	0.653179	0.703631	0.666173	0.636179	0.700043	0.79535	0.56014	0.42875	0.456962	0.49078	0.50429	0.593277	0.778144	0.651478	0.749201	0.502887	0.545883	0.560097	1	0.715523	0.562055	0.502604	0.553991	0.757554	0.54912	0.795003	0.22382	0.382666	0.241577	0.75281	0.657935	0.657662	0.779012	0.701667	0.54797	0.667275	0.51831	0.695253
K937C16hrs	0.814522	0.802841	0.979754	0.825583	0.840142	0.855259	0.730038	0.743894	0.817438	0.573416	0.800787	0.779622	0.579764	0.651216	0.745769	0.82284	0.827019	0.787936	0.566754	0.596355	0.760344	0.773951	0.439409	0.705452	0.719973	0.894069	0.736541	0.792887	0.646523	0.715523	1	0.787835	0.683241	0.764096	0.884357	0.789894	0.722141	0.318229	0.520191	0.329947	0.935971	0.740883	0.673334	0.640967	0.545253	0.795453	0.924628	0.698184	0.808293
K937C30mins	0.818473	0.840569	0.78295	0.975993	0.699286	0.675631	0.610038	0.592155	0.808304	0.720606	0.804967	0.809717	0.535231	0.636193	0.778783	0.807626	0.714865	0.848139	0.702993	0.744726	0.881166	0.877822	0.447217	0.529553	0.654283	0.722167	0.960376	0.896696	0.800955	0.562055	0.787835	1	0.745611	0.96016	0.751388	0.712678	0.542992	0.343647	0.568638	0.474035	0.766621	0.679032	0.615479	0.534881	0.50963	0.805255	0.846287	0.820821	0.699241
K942C16hrs	0.64573	0.656991	0.700588	0.756575	0.629543	0.565766	0.579571	0.525218	0.581036	0.735194	0.617206	0.58951	0.475802	0.484895	0.540459	0.577547	0.570218	0.622307	0.732968	0.751651	0.650615	0.651761	0.510539	0.468323	0.52538	0.600721	0.701486	0.635343	0.788025	0.502604	0.683241	0.745611	1	0.804344	0.693949	0.644188	0.47388	0.495625	0.725925	0.476546	0.678298	0.554046	0.640397	0.450347	0.401511	0.842839	0.812245	0.901751	0.545841
K942C30mins	0.755217	0.798921	0.75312	0.947865	0.679572	0.645062	0.589393	0.586654	0.779122	0.736343	0.783544	0.781674	0.524684	0.59688	0.746578	0.773121	0.690736	0.809782	0.717027	0.759423	0.831651	0.850535	0.456502	0.497611	0.621723	0.687427	0.912486	0.854243	0.827341	0.553991	0.764096	0.96016	0.804344	1	0.726689	0.690205	0.51616	0.343652	0.570965	0.459922	0.736299	0.646503	0.617036	0.520524	0.485441	0.825326	0.834946	0.882729	0.645495
K9Aer1wk	0.756299	0.733159	0.900082	0.771056	0.832145	0.851297	0.798026	0.791682	0.756285	0.591127	0.735938	0.713485	0.599425	0.656241	0.671354	0.754709	0.843356	0.725608	0.582545	0.610349	0.701783	0.725828	0.59508	0.740819	0.65446	0.793792	0.673599	0.742087	0.676009	0.757554	0.884357	0.751388	0.693949	0.726689	1	0.863637	0.752845	0.423462	0.622116	0.333556	0.853357	0.682602	0.724526	0.660411	0.593261	0.763235	0.853851	0.690458	0.739335
K9Aer2wks	0.684355	0.663504	0.79189	0.707015	0.647603	0.67204	0.735178	0.576065	0.651442	0.565305	0.675011	0.633841	0.420472	0.501855	0.569492	0.657146	0.686393	0.665338	0.558811	0.581004	0.676519	0.69892	0.426114	0.539036	0.517245	0.626371	0.64531	0.703196	0.584798	0.54912	0.789894	0.712678	0.644188	0.690205	0.863637	1	0.543856	0.469064	0.612848	0.357512	0.695502	0.531521	0.6096	0.471918	0.40339	0.669899	0.748225	0.62476	0.594588
K9Al3+24hrs	0.585953	0.554842	0.717746	0.567047	0.734998	0.766295	0.619381	0.778403	0.652405	0.397153	0.594399	0.591721	0.779885	0.761437	0.585035	0.643	0.773258	0.573701	0.380059	0.403932	0.515143	0.535648	0.539245	0.984701	0.680313	0.711737	0.47611	0.559571	0.508543	0.795003	0.722141	0.542992	0.47388	0.51616	0.752845	0.543856	1	0.250209	0.376944	0.29672	0.74137	0.694715	0.754163	0.862524	0.754164	0.551792	0.669038	0.478074	0.763302
K9Anaer1wk	0.343849	0.278556	0.364943	0.336402	0.321911	0.311778	0.293847	0.20464	0.231534	0.473277	0.261622	0.259822	0.209879	0.222696	0.205291	0.236631	0.256641	0.279931	0.486176	0.476855	0.29547	0.277143	0.283166	0.282656	0.199068	0.233308	0.287277	0.28918	0.374968	0.22382	0.318229	0.343647	0.495625	0.343652	0.423462	0.469064	0.250209	1	0.813061	0.371794	0.308961	0.214828	0.33981	0.213543	0.212647	0.370458	0.37774	0.398446	0.234856
K9Anaer2wks	0.521795	0.484199	0.5683	0.564449	0.524101	0.483255	0.450539	0.366799	0.409778	0.659126	0.458361	0.446647	0.361928	0.369785	0.387065	0.412166	0.420351	0.453521	0.67527	0.675537	0.490051	0.466749	0.417168	0.39892	0.359933	0.432922	0.509697	0.478963	0.584697	0.382666	0.520191	0.568638	0.725925	0.570965	0.622116	0.612848	0.376944	0.813061	1	0.462759	0.526876	0.390222	0.512685	0.3543	0.325472	0.607635	0.612394	0.639618	0.408216
K9BALBcLungs	0.439968	0.415786	0.357566	0.443675	0.289988	0.253176	0.255344	0.236308	0.346506	0.57819	0.315024	0.369787	0.345608	0.381785	0.376426	0.352431	0.286548	0.437762	0.579897	0.539662	0.448233	0.429868	0.309044	0.314245	0.338133	0.332217	0.490672	0.473102	0.448653	0.241577	0.329947	0.474035	0.476546	0.459922	0.333556	0.357512	0.29672	0.371794	0.462759	1	0.33878	0.351621	0.415905	0.279876	0.306793	0.391237	0.388027	0.418299	0.399045
K9Bleach	0.807042	0.797747	0.936958	0.809916	0.867217	0.859501	0.705768	0.777505	0.79754	0.562906	0.775949	0.762037	0.632459	0.670155	0.744295	0.798758	0.827949	0.745961	0.5585	0.587876	0.732342	0.730692	0.488768	0.739519	0.718047	0.94165	0.733315	0.751896	0.6831	0.75281	0.935971	0.766621	0.678298	0.736299	0.853357	0.695502	0.74137	0.308961	0.526876	0.33878	1	0.748707	0.684036	0.675733	0.584631	0.814507	0.944177	0.708251	0.808449
K9Ca2+ML	0.697863	0.714773	0.738992	0.706777	0.653564	0.64669	0.587093	0.649511	0.72913	0.492412	0.676865	0.675988	0.64025	0.716922	0.695844	0.724538	0.684066	0.708923	0.475508	0.506606	0.668521	0.678371	0.445194	0.689217	0.980585	0.750484	0.657749	0.706986	0.619335	0.657935	0.740883	0.679032	0.554046	0.646503	0.682602	0.531521	0.694715	0.214828	0.390222	0.351621	0.748707	1	0.706424	0.666623	0.641516	0.700823	0.735637	0.588226	0.880657
K9Cd2+24hrs	0.606036	0.611123	0.682616	0.636164	0.707811	0.680887	0.601922	0.636364	0.621495	0.547508	0.572348	0.578598	0.680619	0.666217	0.582929	0.611242	0.685603	0.593492	0.529023	0.55901	0.587008	0.602789	0.548368	0.756667	0.705074	0.644606	0.574357	0.598614	0.671519	0.657662	0.673334	0.615479	0.640397	0.617036	0.724526	0.6096	0.754163	0.33981	0.512685	0.415905	0.684036	0.706424	1	0.708162	0.628883	0.664357	0.693983	0.635212	0.722957
K9CDMES	0.535837	0.536076	0.624855	0.549188	0.691535	0.700352	0.544255	0.727033	0.646854	0.411363	0.583268	0.594928	0.859229	0.826283	0.614394	0.634325	0.698945	0.551833	0.386298	0.418087	0.517407	0.534851	0.523086	0.844153	0.660145	0.659905	0.492057	0.533123	0.544822	0.779012	0.640967	0.534881	0.450347	0.520524	0.660411	0.471918	0.862524	0.213543	0.3543	0.279876	0.675733	0.666623	0.708162	1	0.905476	0.522211	0.602577	0.482517	0.697186
K9CDMML	0.528829	0.525742	0.544503	0.512287	0.589567	0.608811	0.517491	0.634463	0.610027	0.412195	0.494006	0.554191	0.791739	0.83695	0.603994	0.601332	0.613045	0.539184	0.380466	0.410714	0.513263	0.528136	0.5009	0.742479	0.626251	0.582279	0.470151	0.540962	0.529103	0.701667	0.545253	0.50963	0.401511	0.485441	0.593261	0.40339	0.754164	0.212647	0.325472	0.306793	0.584631	0.641516	0.628883	0.905476	1	0.470384	0.530949	0.437582	0.679028
K9Ceft	0.803762	0.854745	0.811224	0.843061	0.728022	0.648786	0.655889	0.627021	0.721805	0.653609	0.741852	0.706759	0.561616	0.598972	0.696885	0.712464	0.657495	0.762257	0.644573	0.676302	0.798823	0.808533	0.465104	0.553302	0.650995	0.756462	0.797139	0.769595	0.796993	0.54797	0.795453	0.805255	0.842839	0.825326	0.763235	0.669899	0.551792	0.370458	0.607635	0.391237	0.814507	0.700823	0.664357	0.522211	0.470384	1	0.910309	0.905242	0.705871
K9ChemRef	0.846328	0.843908	0.93318	0.884013	0.828351	0.801079	0.718954	0.715111	0.79489	0.658138	0.803263	0.77427	0.585955	0.646567	0.739668	0.796177	0.785095	0.795808	0.652246	0.683446	0.799343	0.799858	0.506139	0.662986	0.702334	0.865386	0.812394	0.8081	0.768941	0.667275	0.924628	0.846287	0.812245	0.834946	0.853851	0.748225	0.669038	0.37774	0.612394	0.388027	0.944177	0.735637	0.693983	0.602577	0.530949	0.910309	1	0.840988	0.7837
K9Chlamp	0.682889	0.727525	0.705968	0.829913	0.669608	0.600831	0.573402	0.546826	0.652989	0.754477	0.677501	0.652271	0.51068	0.526435	0.630154	0.644671	0.601537	0.685035	0.742166	0.768706	0.726751	0.739301	0.491285	0.46473	0.558408	0.631323	0.790363	0.709995	0.858228	0.51831	0.698184	0.820821	0.901751	0.882729	0.690458	0.62476	0.478074	0.398446	0.639618	0.418299	0.708251	0.588226	0.635212	0.482517	0.437582	0.905242	0.840988	1	0.574907
K9Cu2+ML	0.766888	0.756285	0.808886	0.732179	0.708704	0.724316	0.648544	0.682133	0.76944	0.502588	0.706537	0.716317	0.676277	0.774884	0.729139	0.772954	0.736086	0.762031	0.486882	0.514337	0.701822	0.703152	0.471182	0.763714	0.841654	0.812159	0.679522	0.749849	0.593609	0.695253	0.808293	0.699241	0.545841	0.645495	0.739335	0.594588	0.763302	0.234856	0.408216	0.399045	0.808449	0.880657	0.722957	0.697186	0.679028	0.705871	0.7837	0.574907	1
K9Des24hrs	0.880395	0.824036	0.766909	0.772635	0.593198	0.63964	0.620133	0.564625	0.78274	0.549979	0.725543	0.779746	0.472582	0.623088	0.761808	0.792799	0.669823	0.817472	0.530687	0.56438	0.830951	0.83385	0.369324	0.553299	0.639122	0.688568	0.745444	0.904059	0.596998	0.535215	0.755398	0.775936	0.528847	0.711583	0.71609	0.665923	0.551468	0.332905	0.440019	0.456852	0.71572	0.668337	0.536319	0.490514	0.529289	0.671826	0.748748	0.573405	0.741464
K9DesRef	0.847936	0.795431	0.762857	0.742153	0.603102	0.64506	0.633345	0.577201	0.745427	0.559097	0.684113	0.726154	0.488403	0.616689	0.720443	0.752737	0.666789	0.771709	0.540055	0.572597	0.794184	0.79555	0.464692	0.586751	0.618879	0.674352	0.702258	0.851437	0.629992	0.563831	0.73152	0.747798	0.56282	0.690495	0.744055	0.676616	0.577392	0.412796	0.503066	0.434656	0.724404	0.650104	0.565892	0.516211	0.558793	0.679956	0.756685	0.599325	0.721787
K9Fe3+24hrs	0.537582	0.524315	0.649012	0.536129	0.689756	0.716423	0.640323	0.788007	0.623686	0.365124	0.589565	0.572512	0.696653	0.68033	0.548761	0.61706	0.744347	0.535135	0.348244	0.377163	0.490034	0.506977	0.656759	0.777566	0.601545	0.634818	0.456041	0.522428	0.50303	0.831273	0.63784	0.514346	0.458104	0.505158	0.743241	0.541385	0.7937	0.197096	0.343233	0.196984	0.659252	0.618898	0.612104	0.760317	0.69638	0.533355	0.615363	0.479746	0.647555
K9Fe3+ML	0.645608	0.666015	0.67466	0.662235	0.60282	0.593022	0.547712	0.598068	0.680319	0.475607	0.631888	0.632196	0.571583	0.638849	0.649609	0.677098	0.63402	0.652983	0.458833	0.490232	0.624748	0.633874	0.439299	0.600349	0.969739	0.678203	0.61932	0.654088	0.615246	0.606056	0.673157	0.633889	0.536639	0.615396	0.625027	0.483772	0.605932	0.194344	0.351442	0.314736	0.683743	0.954702	0.673376	0.584422	0.571631	0.669215	0.688492	0.578533	0.779483
K9H2O1hr	0.577909	0.593531	0.54867	0.619266	0.557551	0.571874	0.5333	0.49627	0.616155	0.556094	0.536462	0.589927	0.519255	0.553099	0.615501	0.621452	0.545175	0.560032	0.531547	0.557323	0.583348	0.596552	0.529786	0.442879	0.540719	0.558735	0.573784	0.613709	0.678416	0.593618	0.536958	0.627772	0.564216	0.641947	0.576484	0.464484	0.454614	0.271467	0.426837	0.326042	0.577062	0.553749	0.547719	0.575813	0.664253	0.596634	0.606476	0.629601	0.555671
K9H2O1hrref	0.828716	0.844702	0.81552	0.883861	0.708505	0.734227	0.688549	0.680385	0.880812	0.59261	0.847394	0.842098	0.558457	0.680226	0.822447	0.879963	0.795446	0.867959	0.57184	0.614686	0.847235	0.881361	0.41878	0.604763	0.720903	0.760299	0.83412	0.903281	0.709253	0.639821	0.840109	0.87947	0.630932	0.852968	0.794275	0.733534	0.623304	0.255236	0.424723	0.371432	0.78269	0.738925	0.638713	0.596725	0.574176	0.746159	0.820588	0.69504	0.77277
K9H2O210mins	0.616462	0.627386	0.734117	0.709229	0.863869	0.811093	0.606438	0.764451	0.724615	0.484047	0.704426	0.681925	0.705191	0.674973	0.67433	0.715686	0.786285	0.627974	0.474851	0.50479	0.58953	0.595461	0.4911	0.721093	0.623415	0.761794	0.646798	0.595878	0.650823	0.78393	0.742638	0.673956	0.585147	0.655871	0.748296	0.570083	0.729372	0.28746	0.485376	0.309289	0.801162	0.636881	0.677995	0.742777	0.631505	0.671151	0.744914	0.621007	0.665198
K9H2O24hr	0.413829	0.393604	0.479796	0.49338	0.557472	0.566154	0.51721	0.542895	0.447774	0.478529	0.431054	0.426711	0.535399	0.502527	0.386826	0.448517	0.545444	0.410563	0.46434	0.480828	0.382745	0.388229	0.687436	0.511098	0.463805	0.479782	0.441369	0.404233	0.571692	0.629671	0.470831	0.490313	0.5646	0.514698	0.57052	0.442746	0.535453	0.269085	0.414632	0.263744	0.516865	0.466257	0.548308	0.563039	0.546719	0.503353	0.545325	0.566287	0.482983
K9H2O24hrref	0.538552	0.517242	0.692511	0.54378	0.758999	0.795844	0.639246	0.832734	0.664829	0.383012	0.609302	0.605946	0.703327	0.650193	0.594597	0.661083	0.791561	0.529065	0.366632	0.393738	0.467122	0.488765	0.674318	0.807686	0.61406	0.702306	0.456197	0.51035	0.52302	0.910577	0.684752	0.513924	0.471541	0.507034	0.761821	0.53124	0.830241	0.204762	0.347548	0.211358	0.70786	0.619985	0.654426	0.788077	0.68257	0.529013	0.631181	0.480645	0.658791
K9H2O2ref	0.616833	0.586274	0.757975	0.651135	0.849903	0.895984	0.679397	0.831276	0.750535	0.456813	0.690554	0.681272	0.67759	0.668054	0.665948	0.748371	0.861617	0.611601	0.441582	0.471123	0.558058	0.581568	0.503891	0.757738	0.627128	0.767617	0.572836	0.590035	0.593082	0.854654	0.780938	0.628792	0.512059	0.607666	0.796934	0.623886	0.780371	0.259622	0.402334	0.226652	0.804419	0.621145	0.662466	0.770745	0.659155	0.582724	0.721687	0.551083	0.672153
K9Insulin	0.460683	0.432932	0.570456	0.488715	0.616881	0.634358	0.530682	0.688653	0.540759	0.404154	0.482253	0.498293	0.626374	0.609188	0.485851	0.537713	0.638955	0.459156	0.386116	0.411427	0.406103	0.406467	0.859735	0.665961	0.545345	0.573982	0.427453	0.445545	0.523695	0.736487	0.529242	0.475353	0.445917	0.463166	0.660593	0.431659	0.672341	0.221458	0.360877	0.247153	0.573364	0.561339	0.565091	0.65465	0.629807	0.472892	0.537312	0.439064	0.597638
K9LBES	0.58717	0.598417	0.711084	0.627792	0.791062	0.773146	0.630381	0.79889	0.709545	0.424824	0.660574	0.641975	0.678343	0.641075	0.652144	0.698594	0.78843	0.565166	0.408281	0.441035	0.544238	0.549771	0.570917	0.737093	0.643294	0.773697	0.549923	0.550938	0.604008	0.817952	0.717249	0.583619	0.53126	0.574048	0.73812	0.513486	0.752403	0.218458	0.389926	0.2105	0.791015	0.65957	0.661788	0.799646	0.727648	0.645673	0.721945	0.573586	0.675629
K9LBML	0.649602	0.671919	0.680243	0.670377	0.702604	0.69321	0.631791	0.699102	0.742411	0.44073	0.678435	0.664357	0.62569	0.667997	0.699868	0.736529	0.711681	0.63519	0.419936	0.45534	0.612389	0.615252	0.504965	0.635432	0.687505	0.745877	0.615015	0.625089	0.629077	0.735125	0.684761	0.634769	0.512742	0.603596	0.683741	0.506952	0.646911	0.199559	0.367671	0.244392	0.744682	0.707978	0.605196	0.720453	0.745663	0.655963	0.713156	0.57055	0.725088
K9LBS	0.565757	0.582681	0.685438	0.629273	0.773343	0.751058	0.635668	0.777759	0.696963	0.416679	0.666593	0.641757	0.652003	0.629006	0.63814	0.687621	0.784978	0.563437	0.399088	0.434339	0.542869	0.545248	0.590241	0.700734	0.619966	0.740227	0.562987	0.544244	0.601698	0.792442	0.690868	0.588831	0.515474	0.576774	0.72866	0.517328	0.719056	0.202708	0.377316	0.201042	0.7576	0.634915	0.642936	0.767522	0.698915	0.626987	0.704335	0.56426	0.652139
K9Mg2+ML	0.778865	0.803983	0.810585	0.768634	0.715795	0.707194	0.65979	0.694041	0.789849	0.522239	0.743251	0.737539	0.705051	0.791287	0.754316	0.78756	0.731408	0.787824	0.50773	0.53921	0.738385	0.74685	0.469456	0.744343	0.848367	0.821989	0.720535	0.772684	0.644541	0.690311	0.811389	0.734693	0.591107	0.692723	0.748845	0.607355	0.741609	0.237303	0.441017	0.397238	0.822918	0.901431	0.700353	0.698881	0.678051	0.768493	0.809844	0.626276	0.95262
K9MHB	0.821034	0.814477	0.940019	0.844133	0.854899	0.862509	0.753233	0.775237	0.831499	0.616966	0.793608	0.776724	0.636203	0.689566	0.763104	0.828124	0.839935	0.779368	0.601795	0.63569	0.771134	0.791855	0.502652	0.739502	0.726163	0.863237	0.745717	0.793945	0.734269	0.750468	0.948142	0.808537	0.739386	0.803194	0.894113	0.76033	0.759533	0.330712	0.543139	0.317677	0.925634	0.750713	0.725776	0.695121	0.618142	0.85859	0.938581	0.791921	0.79722
K9Mn2+ML	0.697216	0.698411	0.758837	0.697739	0.673396	0.685783	0.595182	0.67208	0.748983	0.478772	0.686099	0.68982	0.631903	0.708373	0.706942	0.747212	0.71516	0.703643	0.460594	0.492488	0.655643	0.666094	0.44212	0.708093	0.983656	0.767176	0.644894	0.703242	0.599465	0.684778	0.769038	0.669936	0.528946	0.631943	0.697844	0.554726	0.716651	0.20706	0.370854	0.330078	0.765033	0.984777	0.70881	0.678879	0.642453	0.670852	0.738677	0.56138	0.884238
K9Na2SO4ES	0.517869	0.533016	0.535711	0.540553	0.541832	0.500829	0.493492	0.62538	0.517192	0.431947	0.513168	0.490599	0.733667	0.729665	0.480251	0.506236	0.551736	0.524492	0.420389	0.435519	0.513419	0.529076	0.578038	0.68321	0.576917	0.530463	0.507402	0.507383	0.566262	0.534137	0.516143	0.526767	0.535583	0.526307	0.580578	0.446632	0.682674	0.273343	0.425352	0.400219	0.558926	0.609103	0.619736	0.684436	0.64176	0.587282	0.575067	0.5361	0.623697
K9Na2SO4ML	0.574133	0.584065	0.593255	0.549307	0.582674	0.56357	0.534681	0.679817	0.581976	0.42584	0.529236	0.520146	0.783622	0.817679	0.550206	0.56908	0.601832	0.575856	0.410478	0.42102	0.549621	0.564263	0.561356	0.757299	0.652984	0.613693	0.515489	0.55297	0.55652	0.589273	0.579605	0.532734	0.477776	0.505683	0.61992	0.442435	0.754169	0.220804	0.369258	0.381421	0.6274	0.685459	0.647001	0.762284	0.744093	0.578491	0.601713	0.491508	0.726061
K9Ni2+24hrs	0.633024	0.59782	0.719393	0.59317	0.689299	0.701346	0.632265	0.702816	0.624057	0.436223	0.583384	0.588038	0.739952	0.748896	0.565347	0.619115	0.725638	0.596349	0.422868	0.445264	0.552931	0.563565	0.533533	0.927291	0.655894	0.690848	0.51413	0.593638	0.53368	0.708997	0.7019	0.571026	0.536666	0.541737	0.745642	0.567487	0.911682	0.292196	0.442992	0.37559	0.727222	0.691832	0.756089	0.76057	0.698637	0.610463	0.693199	0.520497	0.775963
K9OsmRef	0.831739	0.798351	0.972479	0.832969	0.836954	0.857704	0.738593	0.746885	0.82596	0.594255	0.800581	0.790529	0.578184	0.657878	0.756381	0.83295	0.841414	0.794443	0.585791	0.612768	0.759431	0.770665	0.468994	0.713883	0.722785	0.893449	0.747036	0.808204	0.663758	0.716376	0.975276	0.802482	0.673843	0.766519	0.88008	0.772686	0.726725	0.332087	0.526077	0.352617	0.942357	0.742972	0.674164	0.634735	0.556029	0.793586	0.935849	0.702181	0.817512
K9Pb2+24hrs	0.592185	0.543716	0.712541	0.564703	0.710228	0.737248	0.590252	0.71647	0.628902	0.423551	0.566047	0.578264	0.736784	0.721009	0.569342	0.621379	0.730594	0.560933	0.407594	0.430267	0.51463	0.526274	0.496545	0.947495	0.757995	0.693703	0.475028	0.562166	0.516875	0.752032	0.708498	0.545506	0.489397	0.516304	0.727335	0.543877	0.947218	0.305863	0.422072	0.33801	0.726016	0.757325	0.791725	0.816177	0.712632	0.55231	0.660726	0.482879	0.766052
K9Plate	0.478612	0.450669	0.610486	0.481979	0.681435	0.709665	0.551409	0.749768	0.572898	0.355726	0.532065	0.537144	0.648441	0.572807	0.517509	0.56621	0.709228	0.454404	0.341672	0.367511	0.408193	0.416111	0.729585	0.75257	0.535974	0.617734	0.402548	0.450528	0.4925	0.855545	0.578908	0.45917	0.43551	0.445786	0.708588	0.456898	0.759469	0.21071	0.35327	0.191712	0.639189	0.551501	0.593148	0.71098	0.606725	0.485809	0.565471	0.438446	0.58522
K9Revived	0.838224	0.773934	0.764464	0.735014	0.606406	0.646084	0.622137	0.578649	0.732895	0.576224	0.669955	0.71669	0.479104	0.602376	0.705846	0.743085	0.665326	0.755755	0.560099	0.589611	0.768291	0.761736	0.482856	0.566005	0.613813	0.684717	0.699815	0.830199	0.630112	0.565232	0.730854	0.736423	0.571447	0.680799	0.731603	0.658312	0.558611	0.395222	0.507495	0.480901	0.725925	0.642047	0.55529	0.491738	0.53442	0.671021	0.754124	0.592277	0.71842
K9TaurineES	0.500942	0.526949	0.517522	0.536219	0.529761	0.480971	0.478504	0.611874	0.504254	0.428421	0.50683	0.480601	0.721457	0.711277	0.471203	0.491618	0.53506	0.515023	0.415858	0.43782	0.508302	0.52389	0.579675	0.655896	0.601329	0.516422	0.507778	0.497507	0.572817	0.518767	0.496898	0.523383	0.536916	0.528489	0.565286	0.432675	0.656087	0.26111	0.421664	0.383258	0.544224	0.626671	0.624173	0.670372	0.623784	0.590465	0.564044	0.543496	0.60077
K9TaurineML	0.559933	0.573529	0.578711	0.541843	0.571543	0.544116	0.518454	0.668867	0.566435	0.419309	0.519659	0.511245	0.773761	0.797736	0.538166	0.553425	0.584682	0.559992	0.403061	0.42111	0.535984	0.54989	0.569542	0.742357	0.658852	0.605417	0.507583	0.540707	0.559775	0.582153	0.561023	0.523947	0.48341	0.502079	0.60611	0.42342	0.737412	0.224869	0.374972	0.374231	0.616532	0.692094	0.641869	0.749793	0.730142	0.581067	0.592389	0.496105	0.711586
K9UV10mins	0.825673	0.884731	0.751442	0.914533	0.656631	0.63878	0.610723	0.579655	0.815259	0.64163	0.81567	0.814017	0.533932	0.641528	0.807406	0.812558	0.684014	0.85585	0.622903	0.664265	0.909491	0.920535	0.379583	0.493421	0.636666	0.712965	0.930555	0.89695	0.756434	0.516662	0.773304	0.926006	0.671432	0.902046	0.705643	0.689943	0.505265	0.268432	0.47408	0.427034	0.748497	0.657293	0.583913	0.528565	0.501385	0.79184	0.822324	0.769817	0.684599
K9UV10minsref	0.852939	0.912539	0.758463	0.921793	0.666615	0.64104	0.616016	0.580852	0.819452	0.66583	0.816554	0.825947	0.545663	0.647885	0.822789	0.821019	0.681312	0.872835	0.648308	0.68786	0.918889	0.923818	0.411537	0.492697	0.655813	0.736193	0.94577	0.908034	0.776262	0.530391	0.769448	0.932532	0.699704	0.904862	0.701747	0.666967	0.499001	0.275233	0.493372	0.449007	0.765852	0.681978	0.59341	0.51719	0.500146	0.82704	0.838104	0.794368	0.707914
K9UV1hr	0.824362	0.849267	0.742223	0.884246	0.64778	0.624958	0.593261	0.561121	0.765384	0.657603	0.761111	0.767541	0.520371	0.613372	0.757142	0.764537	0.655872	0.800946	0.6452	0.681159	0.874121	0.86246	0.416876	0.502988	0.613476	0.70755	0.901509	0.850556	0.761504	0.513226	0.747148	0.89455	0.689983	0.8598	0.70007	0.66195	0.507007	0.323896	0.519938	0.459321	0.74889	0.636103	0.597401	0.513972	0.491616	0.78506	0.821684	0.772631	0.672238
K9UV1hrref	0.830817	0.871057	0.73359	0.900637	0.648741	0.635523	0.604749	0.570899	0.800854	0.65146	0.798101	0.797445	0.523974	0.625932	0.793915	0.801309	0.678128	0.832559	0.635818	0.674558	0.89591	0.888583	0.40397	0.482309	0.6255	0.713541	0.938304	0.871527	0.765062	0.520443	0.749061	0.917569	0.662181	0.874074	0.684802	0.666766	0.490863	0.255589	0.46624	0.422865	0.748128	0.642307	0.576408	0.516152	0.48706	0.777124	0.815147	0.763294	0.679561
K9Zn2+ML	0.799551	0.785135	0.828065	0.770424	0.716171	0.731971	0.644344	0.677289	0.780261	0.542184	0.723695	0.738756	0.652852	0.745941	0.739409	0.784595	0.745046	0.776467	0.528691	0.557025	0.735059	0.735348	0.504559	0.737812	0.860033	0.816676	0.721609	0.785061	0.638447	0.701946	0.820844	0.743206	0.600607	0.687659	0.754618	0.60351	0.737885	0.259619	0.442538	0.43069	0.824126	0.898241	0.712147	0.671017	0.649278	0.733684	0.810471	0.611737	0.9482
K9pH4	0.478998	0.500516	0.450019	0.5142	0.466778	0.47928	0.442714	0.408593	0.490093	0.605198	0.374547	0.473766	0.484274	0.507784	0.537778	0.491734	0.439942	0.471981	0.575175	0.590327	0.529452	0.543637	0.557981	0.377813	0.419541	0.422202	0.504043	0.54091	0.681704	0.461505	0.428274	0.547906	0.566653	0.575897	0.513099	0.417023	0.391978	0.330969	0.472215	0.363747	0.455671	0.423621	0.492185	0.489397	0.583008	0.533558	0.508353	0.621994	0.426164
K9pH7	0.604455	0.560792	0.633097	0.603068	0.577698	0.600053	0.5729	0.59339	0.549733	0.56374	0.507699	0.53292	0.505081	0.541478	0.511232	0.555094	0.591241	0.523557	0.548287	0.569675	0.555817	0.552346	0.859076	0.546559	0.520718	0.584095	0.545852	0.574789	0.654741	0.59412	0.583447	0.603096	0.618976	0.597268	0.689943	0.543601	0.552296	0.393287	0.531586	0.365892	0.615471	0.535376	0.566248	0.517953	0.52801	0.597854	0.652095	0.60773	0.571739
[truncated: 33 more columns]
