# Supplementary material for: The Condition-Dependent Transcriptional Landscape of Burkholderia pseudomallei
Source: PLoS Genet. 2013 Sep 12;9(9):e1003795. doi: 10.1371/journal.pgen.1003795 (PMC3772027; doi:10.1371/journal.pgen.1003795)
Supplement: Table S8 — Coexpression network analysis revealed a collection of gene clusters, functional enrichments in the clusters and associations between clusters - maximum relatedness cluster network (MRCN). (XLS) [file pgen.1003795.s016.xls]

## Sheet: (A) Clusters
Table S8. Coexpression network analysis revealed a collection of gene clusters, functional enrichments in the clusters, and associations between clusters - maximum relatedness cluster network (MRCN). (A) List of clusters, state of reproducibility and their constituent genes
ClusterID	Reproducible	Gene
C001	TRUE	BPSL0041;BPSL0044;BPSL0047;BPSL0048;BPSL0050;BPSL0377;BPSL0510;BPSL0709;BPSL0836;BPSL0837;BPSL1023;BPSL1058;BPSL1129;BPSL1297;BPSL1347;BPSL1395;BPSL1396;BPSL1397;BPSL1586;BPSL1597;BPSL1599;BPSL1601;BPSL1602;BPSL1603;BPSL1604;BPSL1606;BPSL1607;BPSL1630;BPSL1655;BPSL1656;BPSL1670;BPSL1675;BPSL1676;BPSL1677;BPSL1678;BPSL1679;BPSL1681;BPSL1682;BPSL1690;BPSL1691;BPSL1699;BPSL1700;BPSL1952;BPSL2056;BPS…
C002	TRUE	BPSL0023;BPSL0079;BPSL0086;BPSL0127;BPSL0185;BPSL0196;BPSL0197;BPSL0199;BPSL0210;BPSL0211;BPSL0282;BPSL0306;BPSL0380;BPSL0382;BPSL0384;BPSL0390;BPSL0401;BPSL0405;BPSL0432;BPSL0462;BPSL0463;BPSL0466;BPSL0508;BPSL0523;BPSL0524;BPSL0525;BPSL0531;BPSL0534;BPSL0535;BPSL0536;BPSL0537;BPSL0538;BPSL0639;BPSL0640;BPSL0641;BPSL0664;BPSL0665;BPSL0791;BPSL0849;BPSL0854;BPSL0865;BPSL0866;BPSL0867;BPSL0876;BPS…
C003	TRUE	BPSL0073;BPSL0074;BPSL0186;BPSL0189;BPSL0190;BPSL0206;BPSL0241;BPSL0312;BPSL0313;BPSL0394;BPSL0445;BPSL0446;BPSL0514;BPSL0520;BPSL0545;BPSL0644;BPSL0667;BPSL0668;BPSL0779;BPSL0780;BPSL0792;BPSL0796;BPSL0797;BPSL0896;BPSL0906;BPSL0914;BPSL0969;BPSL0998;BPSL1083;BPSL1207;BPSL1209;BPSL1212;BPSL1402;BPSL1416;BPSL1459;BPSL1460;BPSL1461;BPSL1476;BPSL1477;BPSL1478;BPSL1499;BPSL1513;BPSL1514;BPSL1524;BPS…
C004	TRUE	BPSL0005;BPSL0102;BPSL0200;BPSL0212;BPSL0260;BPSL0385;BPSL0386;BPSL0395;BPSL0414;BPSL0442;BPSL0547;BPSL0636;BPSL0672;BPSL0793;BPSL0875;BPSL0992;BPSL1001;BPSL1002;BPSL1003;BPSL1026;BPSL1068;BPSL1098;BPSL1117;BPSL1200;BPSL1354;BPSL1356;BPSL1495;BPSL1502;BPSL1519;BPSL1526;BPSL1530;BPSL1531;BPSL1729;BPSL1946;BPSL1947;BPSL1985;BPSL2090;BPSL2139;BPSL2169;BPSL2171;BPSL2197;BPSL2269;BPSL2315;BPSL2395;BPS…
C005	TRUE	BPSL0097;BPSL0216;BPSL0311;BPSL0690;BPSL0719;BPSL1134;BPSL1135;BPSL1306;BPSL1316;BPSL1370;BPSL1371A;BPSL1376;BPSL1427;BPSL1582;BPSL1876;BPSL1877;BPSL2037;BPSL2068;BPSL2110;BPSL2347;BPSL2591;BPSL2785;BPSL3340;BPSS0024;BPSS0136;BPSS0245;BPSS0597;BPSS0614;BPSS0615;BPSS0678;BPSS0715;BPSS0748;BPSS0758;BPSS0826;BPSS0914;BPSS1045;BPSS1046;BPSS1227;BPSS1312;BPSS1358;BPSS1359;BPSS1360;BPSS1412;BPSS1453;BP…
C006	TRUE	BPSL0720;BPSL0721;BPSL0722;BPSL0723;BPSL0725;BPSL0726;BPSL0727;BPSL0834;BPSL1323a;BPSL1792;BPSL1793;BPSL2032;BPSL2079;BPSL2080;BPSS0272;BPSS0332;BPSS0333;BPSS0545;BPSS0547;BPSS0548;BPSS0549;BPSS0550;BPSS0551;BPSS0552;BPSS0553;BPSS0554;BPSS0555;BPSS0899;BPSS0900;BPSS1023;BPSS1024;BPSS1225;BPSS1233;BPSS1234;BPSS1235;BPSS1319;BPSS1369;BPSS1370;BPSS1376;BPSS1377;BPSS1378;BPSS1424;BPSS1850;BPSS2009;BP…
C007	TRUE	BPSL0060;BPSL0075a;BPSL0076;BPSL0077;BPSL0078;BPSL0187;BPSL0315;BPSL0316;BPSL0450;BPSL0458a;BPSL0519;BPSL0521;BPSL0642;BPSL0643;BPSL0855;BPSL0858;BPSL0870;BPSL0871;BPSL0895;BPSL0907;BPSL0915;BPSL0916;BPSL0991;BPSL1033;BPSL1115;BPSL1206;BPSL1211;BPSL1241;BPSL1349;BPSL1491;BPSL1508;BPSL1510;BPSL1543;BPSL1933;BPSL2422;BPSL2481;BPSL2533;BPSL2593;BPSL2642;BPSL2667;BPSL2894;BPSL3004;BPSL3005;BPSL3144;B…
C008	TRUE	BPSL0464;BPSL0515;BPSL0880;BPSL0888;BPSL0974;BPSL0975;BPSL0990;BPSL0993;BPSL1022;BPSL1038;BPSL1099;BPSL1124;BPSL1195;BPSL1199;BPSL1279;BPSL1415;BPSL1518;BPSL1553;BPSL1581;BPSL1987;BPSL2136;BPSL2198;BPSL2265;BPSL2411;BPSL2524;BPSL2597;BPSL2598;BPSL2725;BPSL3006;BPSL3038;BPSL3428;BPSS0012;BPSS0478;BPSS0601;BPSS0772;BPSS0944;BPSS1017;BPSS1471;BPSS1474;BPSS1703;BPSS1733;BPSS1867;BPSS1959;BPSS2020;BPS…
C009	FALSE	BPSL0191;BPSL0195;BPSL0352;BPSL0408;BPSL0542;BPSL0543;BPSL0658;BPSL0659;BPSL0819;BPSL0966;BPSL0967;BPSL1006;BPSL1021;BPSL1111;BPSL1128;BPSL1208;BPSL1413;BPSL1439;BPSL1469;BPSL2143;BPSL2204;BPSL2245;BPSL2247;BPSL2260;BPSL2383;BPSL2509;BPSL2607;BPSL2629;BPSL2631;BPSL2670;BPSL2872;BPSL2882;BPSL2898;BPSL2935;BPSL2984;BPSL2985;BPSL3219;BPSL3286;BPSL3429;BPSS0220;BPSS0803;BPSS1016;BPSS1018;BPSS1429;BPS…
C010	FALSE	BPSL0087;BPSL0213;BPSL0218;BPSL0242;BPSL0261;BPSL0287;BPSL0319;BPSL0392;BPSL0448;BPSL0532;BPSL0533;BPSL0841;BPSL0850;BPSL0861;BPSL0869;BPSL1010;BPSL1227;BPSL1272;BPSL1344;BPSL1421;BPSL1874;BPSL1966;BPSL2179;BPSL2185;BPSL2263;BPSL2421;BPSL2448;BPSL2482;BPSL2483;BPSL2484;BPSL2535;BPSL2692;BPSL2693;BPSL2707;BPSL2955;BPSL2956;BPSL2993a;BPSL2994;BPSL3017;BPSL3280;BPSL3427;BPSS0223;BPSS0691;BPSS1771
C011	FALSE	BPSL0011;BPSL0194;BPSL0333;BPSL0402;BPSL0527;BPSL0660;BPSL0661;BPSL0671;BPSL1005;BPSL1127;BPSL1177;BPSL2172;BPSL2240;BPSL2324;BPSL2424;BPSL2447;BPSL2510;BPSL2625;BPSL2632;BPSL2643;BPSL2663;BPSL2664;BPSL2671;BPSL2712;BPSL2878;BPSL2879;BPSL2880;BPSL2975;BPSL2986;BPSL3126;BPSL3156;BPSL3404;BPSS0632;BPSS0946;BPSS1135;BPSS1219;BPSS1222;BPSS1326;BPSS1357;BPSS1662;BPSS1795;BPSS2304;BPSS2338
C012	TRUE	BPSL0065;BPSL0219;BPSL0220;BPSL0246;BPSL0529;BPSL0622;BPSL0628;BPSL0652;BPSL0806;BPSL0862;BPSL0863;BPSL1179;BPSL1343;BPSL1398;BPSL1404;BPSL1528;BPSL1844;BPSL2249;BPSL2428;BPSL2429;BPSL2534;BPSL2536;BPSL2656;BPSL2687;BPSL2830;BPSL2837;BPSL2838;BPSL2996;BPSL2999;BPSL3070;BPSL3071;BPSL3379;BPSL3385;BPSS0219;BPSS0630;BPSS0778;BPSS0855;BPSS0940;BPSS1483;BPSS1766
C013	TRUE	BPSL0098;BPSL0099;BPSL0293;BPSL0810;BPSL0811;BPSL0898a;BPSL1178;BPSL1348;BPSL1446;BPSL1488;BPSL1736;BPSL1881;BPSL1926;BPSL1965;BPSL2069;BPSL2108;BPSL2189;BPSL2560;BPSL2637;BPSL2744;BPSL3409;BPSS0023;BPSS0037;BPSS0049;BPSS0598;BPSS0710;BPSS0738;BPSS0825;BPSS0887;BPSS0985;BPSS0986;BPSS1313;BPSS1413;BPSS1676;BPSS1784;BPSS1790;BPSS1819;BPSS2347;BPSS2347a
C014	TRUE	BPSL0188;BPSL0346;BPSL0383;BPSL0447;BPSL0666;BPSL0697;BPSL0868;BPSL1069;BPSL1070;BPSL1120;BPSL1123;BPSL1164;BPSL1201;BPSL1417;BPSL1468;BPSL1500;BPSL1501;BPSL1527;BPSL2187;BPSL2257;BPSL2262;BPSL2542;BPSL2600;BPSL2757;BPSL2902;BPSL2903;BPSL2936;BPSL2941;BPSL2997;BPSL2998;BPSL3062;BPSL3139;BPSL3390;BPSS0557
C015	TRUE	BPSL0232;BPSL0267;BPSL0268;BPSL0280;BPSL0281;BPSL0465;BPSL1829;BPSL1976;BPSL2367;BPSL2465;BPSL3301;BPSL3302;BPSL3303;BPSL3304;BPSL3305;BPSL3306;BPSL3307;BPSL3308;BPSL3309;BPSL3319;BPSL3320;BPSL3321;BPSL3333;BPSL3338;BPSS0204;BPSS0215;BPSS0460;BPSS0933;BPSS1961
C016	TRUE	BPSL0182;BPSL0332;BPSL0802;BPSL0805;BPSL1100;BPSL1161;BPSL1215;BPSL1216;BPSL1217;BPSL1218;BPSL1219;BPSL1220;BPSL1221;BPSL1222;BPSL1223;BPSL1224;BPSL1225;BPSL1226;BPSL2164;BPSL2786;BPSL3395;BPSS1715;BPSS1723;BPSS1724;BPSS1725;BPSS1726;BPSS2331
C017	FALSE	BPSL0443;BPSL0518;BPSL0539;BPSL0546;BPSL1015;BPSL1066;BPSL1110;BPSL1165;BPSL1381;BPSL1473;BPSL1871;BPSL2156;BPSL2157;BPSL2161;BPSL2168;BPSL2250;BPSL2258;BPSL2431;BPSL2513;BPSL2567;BPSL2602;BPSL2665;BPSL2942;BPSL3182;BPSS0845a;BPSS2316
C018	TRUE	BPSL0125;BPSL0238;BPSL0655;BPSL0695;BPSL0696;BPSL0872;BPSL0905;BPSL0988;BPSL1121;BPSL1122;BPSL1160;BPSL1162;BPSL1296;BPSL1474;BPSL1489;BPSL2890;BPSL2913;BPSL3008;BPSL3141;BPSL3142;BPSL3143;BPSL3355;BPSS0372;BPSS2129;BPSS2330
C019	FALSE	BPSL0006;BPSL0107;BPSL0526;BPSL1204;BPSL1287;BPSL1379;BPSL1859;BPSL1863;BPSL1864;BPSL2293;BPSL2294;BPSL2349;BPSL2636;BPSL2696;BPSL2711;BPSS0007;BPSS0019;BPSS0217;BPSS0319;BPSS0699;BPSS0724;BPSS1565;BPSS1848;BPSS2135
C020	TRUE	BPSL0724;BPSL2020;BPSL2021;BPSL2022;BPSL2074;BPSL2075;BPSL2076;BPSL2077;BPSS1380;BPSS1381;BPSS1382;BPSS1383;BPSS1650;BPSS2225;BPSS2226;BPSS2227A;BPSS2231;BPSS2232;BPSS2233;BPSS2234;BPSS2245;BPSS2251;BPSS2257;BPSS2258
C021	TRUE	BPSL0029;BPSL0031;BPSL0032;BPSL0225;BPSL0226;BPSL0227;BPSL0228;BPSL0269;BPSL0273;BPSL0274;BPSL0275;BPSL0276;BPSL0277;BPSL0278;BPSL3291;BPSL3292;BPSL3293;BPSL3323;BPSL3324;BPSL3325;BPSL3326;BPSL3327;BPSL3328;BPSL3329
C022	TRUE	BPSL0158;BPSL0702;BPSL0897;BPSL1191;BPSL1270;BPSL1301;BPSL1304;BPSL1493;BPSL1702;BPSL1704a;BPSL2017;BPSL2848;BPSL2849;BPSL2850;BPSS0067;BPSS0246;BPSS0248;BPSS0318;BPSS0344;BPSS0345;BPSS0346;BPSS0347;BPSS0752;BPSS1998
C023	TRUE	BPSL0433;BPSL0873;BPSL0892;BPSL1108;BPSL1399;BPSL2109;BPSL2532;BPSL3084;BPSL3134;BPSL3365;BPSS0038;BPSS0336;BPSS0447;BPSS0643;BPSS0751;BPSS0857;BPSS0920;BPSS0936;BPSS1298;BPSS1789;BPSS1854;BPSS2264;BPSS2351
C024	TRUE	BPSL1622;BPSS1165;BPSS1166;BPSS1167;BPSS1168;BPSS1169;BPSS1170;BPSS1171;BPSS1172;BPSS1173;BPSS1174;BPSS1175;BPSS1176;BPSS1177;BPSS1178;BPSS1179;BPSS1180;BPSS1181;BPSS1182;BPSS1183;BPSS1184;BPSS1185;BPSS1185a
C025	FALSE	BPSL0406;BPSL0407;BPSL0452;BPSL0517;BPSL0544;BPSL1271;BPSL1345;BPSL1382;BPSL1593;BPSL2302;BPSL2325;BPSL2470;BPSL3036;BPSS0436;BPSS0830;BPSS0892;BPSS0984;BPSS1093;BPSS1373;BPSS1747;BPSS1818;BPSS2164
C026	TRUE	BPSL0424;BPSL1093;BPSL1146;BPSL1611;BPSL1791;BPSL1816;BPSL1901;BPSL1902;BPSL2070;BPSS0255;BPSS0256;BPSS0258;BPSS0335;BPSS0546;BPSS0705;BPSS0706;BPSS0776;BPSS0780;BPSS1327;BPSS1475;BPSS1476;BPSS2179
C027	TRUE	BPSL1808;BPSL1822;BPSL1823;BPSL1856;BPSS0151;BPSS0851;BPSS1033;BPSS1035;BPSS1341;BPSS1342;BPSS1343;BPSS1345;BPSS1428;BPSS1572;BPSS1573;BPSS1574;BPSS1575;BPSS1670;BPSS1671;BPSS1672;BPSS1673;BPSS1674
C028	FALSE	BPSL0245;BPSL0899;BPSL1826;BPSL1827;BPSL1828;BPSL1853;BPSL1854;BPSL2906;BPSL2907;BPSL3160;BPSL3372;BPSL3426;BPSS0353;BPSS0656;BPSS0828;BPSS0938;BPSS1322;BPSS1374;BPSS1562;BPSS1768;BPSS1800;BPSS2305
C029	TRUE	BPSS0677;BPSS1681;BPSS1682;BPSS1683;BPSS1684;BPSS1685;BPSS1686;BPSS1687;BPSS1688;BPSS1689;BPSS1825;BPSS1826;BPSS1827;BPSS1828;BPSS1829;BPSS1830;BPSS1831;BPSS1832;BPSS1833;BPSS1834;BPSS1835;BPSS2036
C030	TRUE	BPSS1512;BPSS1513;BPSS1516;BPSS1517;BPSS1518;BPSS1519;BPSS1520;BPSS1521;BPSS1522;BPSS1523;BPSS1524;BPSS1525;BPSS1526;BPSS1527;BPSS1528;BPSS1529;BPSS1530;BPSS1531;BPSS1532;BPSS1533
C031	TRUE	BPSL0115;BPSL0396;BPSL0513;BPSL0961;BPSL0987;BPSL1126;BPSL1969;BPSL1970;BPSL2183;BPSL2184;BPSL2401;BPSL2814;BPSL2815;BPSL2835;BPSL2867;BPSL3357;BPSS1096;BPSS1346;BPSS1691
C032	FALSE	BPSL0116;BPSL0279;BPSL0288;BPSL0776;BPSL0777;BPSL0851;BPSL1104;BPSL1403;BPSL1948;BPSL2473;BPSL2507;BPSL2547;BPSL2561;BPSL2899;BPSL2995;BPSL3040;BPSL3137;BPSL3242;BPSS2207
C033	TRUE	BPSL0602;BPSL0603;BPSL0604;BPSL0608;BPSL0620;BPSL2207;BPSS0403;BPSS0583;BPSS0584;BPSS1332;BPSS1649;BPSS1804;BPSS1977;BPSS2323;BPSS2324;BPSS2325;BPSS2326;BPSS2327;BPSS2328
C034	TRUE	BPSL0475;BPSL0476;BPSL0477;BPSL0478;BPSL0479;BPSL0480;BPSL0481;BPSL0482;BPSL0483;BPSL0484;BPSL0485;BPSL0486;BPSL0487;BPSL0488;BPSL0489;BPSL0490;BPSL0491;BPSL0492;BPSL0493
C035	TRUE	BPSS1534;BPSS1535;BPSS1536;BPSS1537;BPSS1538;BPSS1539;BPSS1540;BPSS1541;BPSS1542;BPSS1543;BPSS1544;BPSS1545;BPSS1546;BPSS1547;BPSS1548;BPSS1549;BPSS1550;BPSS1551;BPSS1552
C036	TRUE	BPSL2214;BPSL2215;BPSL2216;BPSL2218;BPSL2219;BPSL2220;BPSL2221;BPSL2222;BPSL2223;BPSL2224;BPSL2225;BPSL2226;BPSL2227;BPSL2228;BPSL2229;BPSL2230;BPSL2231;BPSL2232;BPSL2233
C037	FALSE	BPSL0516;BPSL0700;BPSL1383;BPSL1592A;BPSL2004;BPSL2199;BPSL2321;BPSL2419;BPSL2861;BPSL2884;BPSL3011;BPSL3175;BPSL3238;BPSS0352;BPSS0929;BPSS1290;BPSS1883;BPSS1963
C038	FALSE	BPSL0288A;BPSL1073;BPSL1094;BPSL1903;BPSS0139;BPSS0280;BPSS0281;BPSS0496;BPSS0497;BPSS0498;BPSS0663;BPSS1262;BPSS1276;BPSS1353;BPSS1354;BPSS1355;BPSS1481;BPSS1563
C039	FALSE	BPSL0033;BPSL0787;BPSL0883;BPSL1050;BPSL1168;BPSL2640;BPSL2641;BPSL2905;BPSS0011;BPSS0013;BPSS0149;BPSS0150;BPSS1277;BPSS1602;BPSS2124;BPSS2309;BPSS2310;BPSS2313
C040	FALSE	BPSL0036;BPSL0037;BPSL0038;BPSL1290a;BPSL2208;BPSL2210;BPSL2328;BPSS0120;BPSS0155;BPSS0342;BPSS0704;BPSS0779;BPSS0894;BPSS0895;BPSS0922;BPSS1223;BPSS1587;BPSS2289
C041	TRUE	BPSL0359;BPSL1305;BPSL1937;BPSL2081;BPSL2082;BPSL2638;BPSL2728;BPSS0025;BPSS0026;BPSS0027;BPSS0028;BPSS0157;BPSS1837;BPSS2110;BPSS2111;BPSS2142;BPSS2144;BPSS2146
C042	TRUE	BPSL1184;BPSL1273;BPSL2599;BPSL3255;BPSS0415;BPSS0416;BPSS0417;BPSS0418;BPSS0419;BPSS0420;BPSS0421;BPSS0422;BPSS0423;BPSS0424;BPSS0645;BPSS0666;BPSS1288;BPSS1752
C043	FALSE	BPSL0444;BPSL0673;BPSL0674;BPSL1075;BPSL1114;BPSL1317;BPSL1458;BPSL1511;BPSL1512;BPSL1548;BPSL1911;BPSL2291;BPSL2445;BPSL2490;BPSL2491;BPSL2492;BPSS1765
C044	FALSE	BPSL0625;BPSL0634;BPSL1213;BPSL1214;BPSL1339;BPSL1350;BPSL1351;BPSL1852;BPSL1916;BPSL2009;BPSS0373;BPSS1253;BPSS1716;BPSS1717;BPSS1718;BPSS1760;BPSS1845
C045	TRUE	BPSL1590;BPSL1623;BPSL2251;BPSS0065;BPSS0766;BPSS1188;BPSS1190;BPSS1191;BPSS1192;BPSS1193;BPSS1194;BPSS1195;BPSS1196;BPSS1197;BPSS1198;BPSS1199
C046	TRUE	BPSL0597;BPSL0598;BPSL0599;BPSL0600;BPSL0601;BPSL1390;BPSL1692;BPSL3089;BPSL3376;BPSS0288;BPSS0448;BPSS0767;BPSS1239;BPSS1561;BPSS1658;BPSS1659
C047	TRUE	BPSL0198;BPSL0340;BPSL1187;BPSL1188;BPSL2274;BPSL2275;BPSL2276;BPSL2277;BPSL2391;BPSL2813;BPSL3155;BPSL3359;BPSS0406;BPSS0489;BPSS2134
C048	FALSE	BPSL0710;BPSL0778;BPSL1210;BPSL1847;BPSL1920;BPSL2170;BPSL2730;BPSL2868;BPSL2914;BPSL2978;BPSL2979;BPSS1693;BPSS1694;BPSS1763;BPSS1764
C049	TRUE	BPSL0121;BPSL0122;BPSL0123;BPSL0124;BPSL0391;BPSL0411;BPSL0970;BPSL2295;BPSL2587B;BPSL3018;BPSL3154;BPSS0029;BPSS1778;BPSS2017;BPSS2349
C050	TRUE	BPSS0734;BPSS1226;BPSS2092;BPSS2093;BPSS2094;BPSS2097;BPSS2098;BPSS2099;BPSS2100;BPSS2101;BPSS2102;BPSS2103;BPSS2104;BPSS2106;BPSS2107
C051	FALSE	BPSL0708;BPSL2062;BPSL2065;BPSS0060;BPSS0093;BPSS0094;BPSS0095;BPSS0096;BPSS0097;BPSS0099;BPSS0396;BPSS0402A;BPSS0480;BPSS0653;BPSS2112
C052	TRUE	BPSL0045;BPSS1294;BPSS1368;BPSS1379;BPSS2211;BPSS2219;BPSS2220;BPSS2221;BPSS2227;BPSS2229;BPSS2237;BPSS2238;BPSS2242;BPSS2260;BPSS2261
C053	TRUE	BPSL0569;BPSL0586a;BPSL0939;BPSL0940;BPSL0941;BPSL3259;BPSL3260;BPSL3261;BPSL3267;BPSL3268;BPSS0384;BPSS0384A;BPSS0399;BPSS0400;BPSS2074
C054	TRUE	BPSS0517;BPSS0519;BPSS0520;BPSS0521;BPSS0522;BPSS0523;BPSS0524;BPSS0525;BPSS0526;BPSS0527;BPSS0528;BPSS0529;BPSS0530;BPSS0531;BPSS0532
C055	TRUE	BPSS1323;BPSS1607;BPSS1608;BPSS1609;BPSS1615;BPSS1619;BPSS1620;BPSS1621;BPSS1624;BPSS1625;BPSS1626;BPSS1627;BPSS1628;BPSS1629;BPSS1630
C056	FALSE	BPSL0202;BPSL0207;BPSL0208;BPSL0669;BPSL0962;BPSL0995;BPSL1118;BPSL1119;BPSL1281;BPSL1295;BPSL2688;BPSL2689;BPSL2824;BPSS0227
C057	FALSE	BPSL0215;BPSL0376;BPSL1386;BPSL2087;BPSL2138;BPSL2676;BPSL2677;BPSL2678;BPSL2679;BPSL2789;BPSL2812;BPSL2988;BPSL3081;BPSS0964
C058	TRUE	BPSL0026;BPSL0027;BPSL0028;BPSL0030;BPSL0229;BPSL0230;BPSL0231;BPSL0270;BPSL0271;BPSL0272;BPSL3294;BPSL3295;BPSL3322;BPSS0186
C059	TRUE	BPSL0075;BPSL0799;BPSL0800;BPSL0801;BPSL1116;BPSL1246;BPSL2100;BPSL2160;BPSL2176;BPSL3048;BPSL3124;BPSL3246;BPSS0356;BPSS0739
C060	FALSE	BPSL2351;BPSL2352;BPSL2354;BPSL2355;BPSL2368;BPSL2369;BPSL2370;BPSL2371;BPSL2372;BPSL2373;BPSL2374;BPSL2375;BPSL2376;BPSL2840
C061	FALSE	BPSL0412;BPSL1805;BPSL2486;BPSL2700;BPSS0021;BPSS0022;BPSS0205;BPSS0237;BPSS0254;BPSS0449;BPSS0726;BPSS1255;BPSS1559;BPSS2117
C062	TRUE	BPSL1672;BPSS0174;BPSS0175;BPSS0176;BPSS0177;BPSS0178;BPSS0179;BPSS0180;BPSS0181;BPSS0182;BPSS0183;BPSS0184;BPSS0185;BPSS1310
C063	TRUE	BPSL0983;BPSL1266;BPSL1267;BPSL1268;BPSL1545;BPSL1998;BPSL1999;BPSL2000;BPSL2001;BPSL2836;BPSS0135;BPSS1750;BPSS2291
C064	TRUE	BPSL1710;BPSL1711;BPSL1712;BPSL1713;BPSL1714;BPSL1715;BPSL1716;BPSL1717;BPSL1718;BPSL1719;BPSL1720;BPSL1721;BPSS0611
C065	TRUE	BPSL1449;BPSL1592;BPSL1764;BPSL2303;BPSL2716;BPSL2717;BPSL2863;BPSL3367;BPSS0642;BPSS1207;BPSS1208;BPSS1211;BPSS2171
C066	TRUE	BPSL0093;BPSL0325;BPSL1289;BPSL1595;BPSL1885;BPSL2011;BPSL2205;BPSL2282;BPSL2466;BPSL2634;BPSL3240;BPSS0945;BPSS1980
C067	FALSE	BPSL0699;BPSL1366;BPSL1589;BPSL1865;BPSL1886;BPSL2718;BPSL2834;BPSL2964;BPSS0835;BPSS1160;BPSS1161;BPSS1438;BPSS1849
C068	TRUE	BPSS0299;BPSS0300;BPSS0301;BPSS0302;BPSS0303;BPSS0304;BPSS0305;BPSS0306;BPSS0307;BPSS0308;BPSS0309;BPSS0310;BPSS0311
C069	TRUE	BPSL0711;BPSL1552;BPSL1741;BPSS1112;BPSS1729;BPSS1929;BPSS1935;BPSS1936;BPSS1937;BPSS1938;BPSS1939;BPSS2302;BPSS2303
C070	TRUE	BPSL0004;BPSL1049;BPSL1929;BPSL1930;BPSL2107;BPSL2255A;BPSL2522;BPSL3281;BPSL3388;BPSS1680;BPSS2131;BPSS2131a
C071	TRUE	BPSL0363;BPSL0689;BPSL1860;BPSL2141;BPSL2847;BPSS1870;BPSS1871;BPSS1872;BPSS1873;BPSS1874;BPSS1875;BPSS1876
C072	FALSE	BPSL0118;BPSL0784;BPSL0989;BPSL1462;BPSL2595;BPSL2633;BPSL2683;BPSL2684;BPSL2685;BPSL2686;BPSL2963;BPSS1696
C073	TRUE	BPSL0429;BPSL1352;BPSL2470A;BPSL2926;BPSL2957;BPSL2958;BPSL3085;BPSL3179;BPSL3403;BPSS1091;BPSS1758;BPSS2163
C074	TRUE	BPSL0680;BPSL1025;BPSL1251;BPSL1337;BPSL1346;BPSS0492;BPSS0937;BPSS1296;BPSS1603;BPSS1604;BPSS1605;BPSS1713
C075	FALSE	BPSL0358;BPSL2130;BPSL2195;BPSL2475;BPSS0599;BPSS0796;BPSS0921;BPSS2122;BPSS2181;BPSS2182;BPSS2183;BPSS2184
C076	TRUE	BPSS0087;BPSS0092;BPSS0101;BPSS0108;BPSS0109;BPSS0110;BPSS0111;BPSS0112;BPSS0113;BPSS0114;BPSS0115;BPSS1224
C077	TRUE	BPSL0646;BPSL1101;BPSL1492;BPSL1885A;BPSL2093;BPSL2177;BPSL2409;BPSL2695;BPSL3010;BPSL3080;BPSS0718;BPSS0871
C078	TRUE	BPSL0130;BPSL0130a;BPSL0131;BPSL0132;BPSL0133;BPSL0134;BPSL0135;BPSL0136;BPSL0137;BPSL0138;BPSL0139;BPSS0769A
C079	FALSE	BPSL0140;BPSL0560;BPSL0561;BPSL1140;BPSL1141;BPSL1142;BPSL1143;BPSL1154;BPSL2548;BPSL3251;BPSS0216;BPSS2063
C080	TRUE	BPSL0236;BPSL1778;BPSL1779;BPSL1781;BPSL1782;BPSL1783;BPSL1784;BPSL1785;BPSL1786;BPSL1787;BPSS0362;BPSS0369
C081	TRUE	BPSL0035;BPSL0917;BPSL3254A;BPSS0251;BPSS0787;BPSS0788;BPSS0789;BPSS0790;BPSS0791;BPSS0792;BPSS2155
C082	FALSE	BPSL1467;BPSL1471;BPSL1472;BPSL2252;BPSL2253;BPSL2270;BPSL2438;BPSL2666;BPSS1443;BPSS1770;BPSS1773
C083	TRUE	BPSL0698;BPSL1378;BPSL1463;BPSL2152;BPSL2153;BPSL2154;BPSL2166;BPSL2255;BPSS0668;BPSS1759;BPSS1960
C084	TRUE	BPSL1481;BPSL3022;BPSL3023;BPSL3024;BPSL3025;BPSL3026;BPSL3027;BPSL3028;BPSL3029;BPSL3030;BPSL3031
C085	TRUE	BPSL1080;BPSL2174;BPSL2200;BPSL2201;BPSL2202;BPSL2203;BPSL2326;BPSL3167;BPSS1142;BPSS1880;BPSS1881
C086	FALSE	BPSL0798;BPSL1125;BPSL1686;BPSL1687;BPSL2254;BPSL2816;BPSL2981;BPSL3127;BPSL3128;BPSL3129;BPSL3425
C087	TRUE	BPSS0581;BPSS0582;BPSS0586;BPSS0587;BPSS0588;BPSS0589;BPSS0590;BPSS0591;BPSS0592;BPSS0593;BPSS0594
C088	TRUE	BPSL0427;BPSL0509;BPSL1019;BPSL1020;BPSL1265;BPSL2002;BPSL3366;BPSS1422;BPSS1459;BPSS2311;BPSS2312
C089	FALSE	BPSL0066;BPSL0728;BPSL2078;BPSS1293;BPSS1404;BPSS1984;BPSS2091;BPSS2095;BPSS2096;BPSS2105;BPSS2202
C090	TRUE	BPSL0403;BPSL0404;BPSL0440;BPSL0694;BPSL0781;BPSL1055;BPSL1503;BPSL2432;BPSL2433;BPSL2434;BPSL2437
C091	TRUE	BPSL1840;BPSL1841;BPSL1842;BPSL2495;BPSL2948;BPSL3421;BPSS0003;BPSS0008;BPSS0187;BPSS0297;BPSS1334
C092	TRUE	BPSS0721a;BPSS0837;BPSS0838;BPSS0840;BPSS1099;BPSS1100;BPSS1955;BPSS1956;BPSS1958;BPSS2284;BPSS2287
C093	FALSE	BPSL0744;BPSL0745;BPSL0746;BPSL0747;BPSL1694;BPSL1695;BPSL3269;BPSL3341;BPSS1311;BPSS1385;BPSS1557
C094	TRUE	BPSL1054;BPSL1872;BPSL2015;BPSS0202;BPSS0948;BPSS1103;BPSS1104;BPSS1105;BPSS1106;BPSS1107;BPSS1108
C095	TRUE	BPSL0350;BPSL0707;BPSL1958;BPSS0020;BPSS0211;BPSS0212;BPSS0213;BPSS0214;BPSS0757;BPSS1657;BPSS1858
C096	TRUE	BPSL0357;BPSL2713;BPSS0298;BPSS0481;BPSS0482;BPSS0483;BPSS0484;BPSS0485;BPSS0486;BPSS0487;BPSS1860
C097	TRUE	BPSL1549;BPSL1763;BPSL2733;BPSS0035;BPSS0439;BPSS0493;BPSS1102;BPSS1836;BPSS1916;BPSS1917;BPSS2025
C098	TRUE	BPSL0205;BPSL0900;BPSL1532;BPSL2128;BPSL2449;BPSL2450;BPSL2451;BPSS0606;BPSS0932;BPSS1793
C099	FALSE	BPSL1749;BPSL2084A;BPSL2568;BPSL2569;BPSL2627;BPSL2734;BPSL2875;BPSL2987;BPSS0852;BPSS2321
C100	FALSE	BPSL0016;BPSL0017;BPSL0018;BPSL1067;BPSL1445;BPSL2165;BPSL2788;BPSS0816;BPSS0817;BPSS1588
C101	TRUE	BPSL1176;BPSL1253;BPSL1371B;BPSL1371C;BPSL1529;BPSL2072;BPSS0683;BPSS0882;BPSS2087;BPSS2346
C102	FALSE	BPSL0774;BPSL0884;BPSL0885;BPSL1380;BPSL2006;BPSL2416;BPSS0036;BPSS0771;BPSS1232;BPSS2278
C103	TRUE	BPSL0590;BPSL0591;BPSL1728;BPSL2927;BPSS0116;BPSS0271;BPSS0556;BPSS0737;BPSS1983;BPSS2002
C104	TRUE	BPSS1490;BPSS1499;BPSS1500;BPSS1501;BPSS1502;BPSS1503;BPSS1504;BPSS1507;BPSS1509;BPSS1510
C105	FALSE	BPSL0430;BPSS0934;BPSS0994;BPSS1278a;BPSS1598;BPSS1599;BPSS1600;BPSS1601;BPSS1695;BPSS1699
C106	FALSE	BPSL0051;BPSL1598;BPSS0238;BPSS0239;BPSS0391A;BPSS0499;BPSS0818;BPSS1710;BPSS1979;BPSS2185
C107	TRUE	BPSL0378;BPSL0379;BPSL0656;BPSL0657;BPSL0864;BPSL2417;BPSS0166;BPSS1586;BPSS1651;BPSS2308
C108	FALSE	BPSL0064;BPSL0222;BPSL0223;BPSL0224;BPSL0329;BPSL1047;BPSS0210;BPSS0939;BPSS1822;BPSS1970
C109	TRUE	BPSL0317;BPSL0318;BPSL0626;BPSL0909;BPSL1353;BPSL2135;BPSL3059;BPSL3184;BPSL3185;BPSL3391
C110	TRUE	BPSL0141;BPSL0142;BPSL0143;BPSL0552;BPSL0553;BPSL0556;BPSL1157;BPSL1642;BPSL2331;BPSS2061
C111	TRUE	BPSL0582;BPSL0583;BPSL0584;BPSL0585;BPSL0586;BPSL0943;BPSL1693;BPSL1705;BPSL1851;BPSS0744
C112	TRUE	BPSL0302;BPSL1406;BPSL1406A;BPSL1407;BPSL1408;BPSS0721;BPSS0839;BPSS1101;BPSS1915;BPSS1954
C113	TRUE	BPSS1928;BPSS1947;BPSS1948;BPSS1949;BPSS1950;BPSS1951;BPSS1952;BPSS1953;BPSS1957;BPSS2285
C114	TRUE	BPSL0982;BPSL1374;BPSL1578;BPSL1625;BPSL2703;BPSS1127;BPSS1128;BPSS1129;BPSS1130;BPSS1902
C115	TRUE	BPSL2359;BPSL2360;BPSL2361;BPSL2362;BPSL2363;BPSL2364;BPSL2377;BPSS1728A;BPSS1941;BPSS2282
C116	TRUE	BPSS1805;BPSS1806;BPSS1807;BPSS1808;BPSS1809;BPSS1810;BPSS1811;BPSS1812;BPSS1815;BPSS2265
C117	TRUE	BPSL1264;BPSL2418;BPSL3389A;BPSS0681;BPSS0716;BPSS0872;BPSS1228;BPSS1237;BPSS1803
C118	TRUE	BPSL1097;BPSL1180;BPSL1234;BPSL1235;BPSL1236;BPSL1237;BPSL1238;BPSL1466;BPSS0201
C119	TRUE	BPSL0803;BPSL1029;BPSL2608;BPSL2609;BPSL2610;BPSL2611;BPSL2612;BPSL2613;BPSL2614
C120	TRUE	BPSL0214;BPSL1419;BPSL2496;BPSL2819;BPSL3075;BPSS0670;BPSS1719;BPSS1720;BPSS1794
C121	TRUE	BPSL1275;BPSL1487;BPSL2592;BPSS0060B;BPSS0646;BPSS0785;BPSS1482;BPSS2223;BPSS2224
C122	TRUE	BPSL1680;BPSL3247;BPSL3248;BPSL3249;BPSS0137;BPSS0138;BPSS0786;BPSS1866;BPSS2061A
C123	TRUE	BPSS1264;BPSS1576;BPSS1577;BPSS1578;BPSS1578a;BPSS1579;BPSS1580;BPSS1581;BPSS1582
C124	FALSE	BPSL2973;BPSL2974;BPSS0153;BPSS1306;BPSS1408;BPSS1409;BPSS1410;BPSS1734;BPSS1782
C125	FALSE	BPSL1148;BPSL1149;BPSL3262;BPSL3263;BPSL3264;BPSL3265;BPSL3266;BPSS0068;BPSS0732
C126	TRUE	BPSL3041;BPSL3229;BPSL3230;BPSL3231;BPSL3232;BPSL3233;BPSL3234;BPSL3250;BPSS0829
C127	TRUE	BPSL0092;BPSL1107;BPSL1132;BPSL1307;BPSL1308;BPSL1573;BPSL1843;BPSL2639;BPSS1421
C128	TRUE	BPSL1392;BPSL1393;BPSL1614;BPSL1615;BPSL1616;BPSL1617;BPSL1618;BPSL2073;BPSS1801
C129	TRUE	BPSL1286;BPSS0451;BPSS0635;BPSS1154;BPSS1155;BPSS1156;BPSS1157;BPSS1158;BPSS1159
C130	TRUE	BPSL1734;BPSL1735;BPSL1982;BPSL2885;BPSL2886;BPSL2887;BPSS0144;BPSS2045;BPSS2345
C131	TRUE	BPSL0103;BPSL0203;BPSL0204;BPSL0856;BPSL1405;BPSL1484;BPSL2305;BPSL2826;BPSL2827
C132	TRUE	BPSL1551;BPSS1114;BPSS1115;BPSS1585;BPSS1918;BPSS1919;BPSS1920;BPSS1922;BPSS2288
C133	TRUE	BPSL1338;BPSL2787;BPSL2803;BPSL2804;BPSL2805;BPSL2806;BPSL2806a;BPSL2807;BPSS0931
C134	FALSE	BPSL0839;BPSL0878;BPSL0879;BPSL1205;BPSL1336;BPSL3283;BPSS0274;BPSS0628;BPSS1200
C135	TRUE	BPSS0995;BPSS0996;BPSS0997;BPSS0998;BPSS0999;BPSS1000;BPSS1001;BPSS1002;BPSS1004
C136	TRUE	BPSL0500;BPSL2715;BPSS0066;BPSS0425;BPSS0426;BPSS0427;BPSS0428;BPSS0429;BPSS2123
C137	TRUE	BPSL0416;BPSL0817;BPSL1994;BPSL1995;BPSL1996;BPSL1997;BPSL2404;BPSL2726;BPSL2727
C138	TRUE	BPSS1266;BPSS1267;BPSS1268;BPSS1269;BPSS1270;BPSS1271;BPSS1272;BPSS1273;BPSS1274
C139	TRUE	BPSL0612;BPSL0613;BPSL0614;BPSL0615;BPSL0616;BPSL0617;BPSL0618;BPSL0619;BPSL3087
C140	FALSE	BPSL1684;BPSL1685;BPSL1944;BPSL1981;BPSL2398;BPSL2408;BPSS0290;BPSS1755
C141	TRUE	BPSL0428;BPSL2278;BPSL2523;BPSL3133;BPSL3405;BPSL3406;BPSL3407;BPSL3408
C142	FALSE	BPSL0891;BPSL1310;BPSL2423;BPSL2749;BPSL2915;BPSL3279;BPSS0374;BPSS0930
C143	FALSE	BPSL3064;BPSL3282;BPSL3313;BPSS0363;BPSS0629;BPSS1745;BPSS1781;BPSS1791
C144	TRUE	BPSL0783;BPSL0971;BPSL1400;BPSL1504;BPSL3046;BPSL3047;BPSS0226;BPSS1591
C145	FALSE	BPSL0347;BPSL1579;BPSL1580;BPSS0351;BPSS0652;BPSS0810;BPSS1121;BPSS1677
C146	TRUE	BPSL1239;BPSL1464;BPSL2147;BPSL2148;BPSL2149;BPSL2150;BPSL2151;BPSL2511
C147	TRUE	BPSL0010;BPSL1862;BPSL2761;BPSL2762;BPSL2763;BPSL2891;BPSL3254B;BPSS0225
C148	TRUE	BPSL0701;BPSL1411;BPSL1754;BPSL2186;BPSL2194;BPSL3274;BPSS0059;BPSS0927
C149	TRUE	BPSL1242;BPSL3396;BPSL3397;BPSL3398;BPSL3399;BPSL3400;BPSL3401;BPSS2339
C150	TRUE	BPSL3287;BPSS0488;BPSS0507;BPSS0508;BPSS0509;BPSS0510;BPSS0511;BPSS0514
C151	TRUE	BPSL1538;BPSL1539;BPSL1540;BPSL1541;BPSL1570;BPSL2345;BPSS0273;BPSS1913
C152	TRUE	BPSL0248;BPSL0729;BPSL1887;BPSL2990;BPSS0676;BPSS0978;BPSS0979;BPSS1965
C153	TRUE	BPSL1494;BPSL2306;BPSL2709;BPSL2710;BPSS0431;BPSS1229;BPSS1230;BPSS1299
C154	TRUE	BPSL0049;BPSL0307;BPSL0308;BPSL0309;BPSS0326;BPSS0393;BPSS1240;BPSS1644
C155	TRUE	BPSL1669;BPSL3285;BPSS0119;BPSS0121;BPSS0122;BPSS0402B;BPSS0471;BPSS1876A
C156	FALSE	BPSL0046;BPSL1790;BPSL2060;BPSS0329;BPSS0782;BPSS0784;BPSS1245;BPSS1318
C157	TRUE	BPSS0098;BPSS0873;BPSS1388;BPSS1390;BPSS1391;BPSS1397;BPSS1398;BPSS1399
C158	TRUE	BPSL0881;BPSL0924;BPSL2103;BPSS0682;BPSS0884;BPSS0885;BPSS0886;BPSS0911
C159	TRUE	BPSL1329;BPSL1330;BPSL1331;BPSL1332;BPSL1333;BPSL1334;BPSL1335;BPSS1486
C160	TRUE	BPSL0592;BPSL0593;BPSL0594;BPSL0595;BPSL0596;BPSL1554;BPSL1637;BPSL1733
C161	TRUE	BPSL0323;BPSL1046;BPSS0074;BPSS0918;BPSS1841;BPSS1842;BPSS1843;BPSS1844
C162	TRUE	BPSL0675;BPSL0934;BPSL1311;BPSL1752;BPSL3393;BPSS0692;BPSS0693;BPSS0694
C163	TRUE	BPSL0108;BPSL0324;BPSL0397;BPSL1299;BPSL2051;BPSL2052;BPSS0014;BPSS2172
C164	TRUE	BPSL0328;BPSL0647;BPSL2264;BPSL2498;BPSL2499;BPSL2500;BPSL3037;BPSS0058
C165	TRUE	BPSL1013;BPSL1759;BPSL1760;BPSL1761;BPSL1762;BPSL1771;BPSL1772;BPSL1773
C166	FALSE	BPSL0327;BPSL1041;BPSL1042;BPSL1043;BPSL1986;BPSL2504;BPSS1132;BPSS1133
C167	TRUE	BPSL0627;BPSL1169;BPSL1375;BPSL1594;BPSL1765;BPSL2125;BPSL2298;BPSL2701
C168	TRUE	BPSL1133;BPSS2213;BPSS2214;BPSS2215;BPSS2216;BPSS2217;BPSS2218;BPSS2230
C169	TRUE	BPSL2405;BPSL3237;BPSS2081;BPSS2082;BPSS2083;BPSS2084;BPSS2085;BPSS2086
C170	TRUE	BPSL1248;BPSS0268;BPSS0268A;BPSS0990;BPSS0991;BPSS1655;BPSS1656;BPSS1865
C171	TRUE	BPSL0662;BPSL1000;BPSL1433;BPSL1434;BPSL1562;BPSL2468;BPSS0574;BPSS1777
C172	TRUE	BPSL3101;BPSL3104;BPSL3105;BPSL3106;BPSL3107;BPSL3108;BPSL3110;BPSL3111
C173	TRUE	BPSL2851;BPSL2852;BPSL2853;BPSL2854;BPSL2855;BPSL2856;BPSL2857;BPSS0343
C174	TRUE	BPSL0853;BPSL2559;BPSL2797;BPSL2798;BPSL2799;BPSL2800;BPSL2801;BPSL2802
C175	FALSE	BPSL1412;BPSL1442;BPSL1443;BPSL1984;BPSL2493;BPSS1746;BPSS1751
C176	TRUE	BPSL1039;BPSL1868;BPSL2446;BPSS0156;BPSS0889;BPSS1697;BPSS1698
C177	TRUE	BPSL2992;BPSL3050;BPSL3051;BPSL3052;BPSL3053;BPSL3054;BPSL3055
C178	FALSE	BPSL0691;BPSL1321;BPSL2648;BPSL2649;BPSL3236;BPSS1743;BPSS1744
C179	TRUE	BPSL0020;BPSL0021;BPSL0022;BPSL1912;BPSL1913;BPSL1914;BPSL1915
C180	FALSE	BPSL1280;BPSL3072;BPSL3073;BPSL3074;BPSL3138;BPSS0030;BPSS0252
C181	FALSE	BPSL1262;BPSL1263;BPSL1825;BPSS0733;BPSS1864;BPSS2115;BPSS2307
C182	FALSE	BPSL1027;BPSL2320;BPSL2348;BPSL3317;BPSS1040;BPSS2317;BPSS2318
C183	TRUE	BPSL1612;BPSL1810;BPSL1811;BPSL1812;BPSL1813;BPSL1814;BPSL1815
C184	FALSE	BPSL0782;BPSL1254;BPSS0623;BPSS0624;BPSS0625;BPSS1480;BPSS1669
C185	TRUE	BPSL0094;BPSL1639;BPSL2589;BPSS0055;BPSS0056;BPSS0057;BPSS0603
C186	TRUE	BPSL0360;BPSL0361;BPSL0362;BPSL1300;BPSS0627;BPSS1473;BPSS2145
C187	FALSE	BPSL0177;BPSL0178;BPSL0179;BPSL0624;BPSL1475;BPSL1482;BPSS1364a
C188	FALSE	BPSL0635;BPSL1542;BPSL1978;BPSL2140;BPSL2241;BPSL2242;BPSL2243
C189	FALSE	BPSL0297;BPSL0820;BPSL0821;BPSL1613;BPSL2732;BPSL3392;BPSS1767
C190	FALSE	BPSL0730;BPSL1174;BPSL1175;BPSL2402;BPSL2550;BPSL2748;BPSL2991
C191	TRUE	BPSL1447;BPSL1465;BPSS0081;BPSS0082;BPSS0083;BPSS0605;BPSS2130
C192	TRUE	BPSL1391;BPSS0033;BPSS0230;BPSS0413;BPSS0414;BPSS0660;BPSS1569
C193	TRUE	BPSL0417;BPSL0929;BPSL1878;BPSL1879;BPSS0228;BPSS2275;BPSS2276
C194	FALSE	BPSL0753;BPSL0942;BPSL0945;BPSL0946;BPSL0947;BPSL0948;BPSL3332
C195	TRUE	BPSL0747a;BPSL0748;BPSL0749;BPSL0750;BPSL0751;BPSL0752;BPSL0951
C196	TRUE	BPSL1167;BPSL1365;BPSL1737;BPSL1738;BPSL1739;BPSL1740;BPSL2053
C197	FALSE	BPSL0388;BPSL0426;BPSL0857;BPSL1414;BPSL2487;BPSL3135;BPSL3136
C198	TRUE	BPSL0356;BPSL0846;BPSL0847;BPSL0848;BPSL3239;BPSS0652A;BPSS0711
C199	FALSE	BPSL0247;BPSL1972;BPSL2338;BPSL2339;BPSL2340;BPSL2341;BPSS0224
C200	TRUE	BPSS1414;BPSS1415;BPSS1416;BPSS1417;BPSS1418;BPSS1419;BPSS1420
C201	TRUE	BPSL0336;BPSL1809;BPSL1855;BPSL1857;BPSL1858;BPSS0850;BPSS1427
C202	TRUE	BPSL1057;BPSL2091;BPSL2092;BPSL2193;BPSS0266;BPSS1678;BPSS1898
C203	TRUE	BPSS2067;BPSS2068;BPSS2069;BPSS2070;BPSS2071;BPSS2072;BPSS2073
C204	FALSE	BPSL0605;BPSL0606;BPSL0607;BPSL0610;BPSL0611;BPSS1976;BPSS1978
C205	TRUE	BPSL2042A;BPSL2043;BPSL2044;BPSL2045;BPSL2046;BPSL2047;BPSS1209
C206	FALSE	BPSS1375;BPSS2212;BPSS2236;BPSS2239;BPSS2240;BPSS2241;BPSS2243
C207	TRUE	BPSL1888;BPSL1889;BPSL1890;BPSL1891;BPSL1892;BPSL1893;BPSL1894
C208	TRUE	BPSS1302;BPSS1303;BPSS1304;BPSS1305;BPSS1307;BPSS1308;BPSS1309
C209	TRUE	BPSL2403;BPSS2136;BPSS2137;BPSS2138;BPSS2139;BPSS2140;BPSS2141
C210	TRUE	BPSS1592;BPSS1610;BPSS1611;BPSS1613;BPSS1614;BPSS1618;BPSS1622
C211	TRUE	BPSL0976;BPSL0977;BPSL0978;BPSL0979;BPSL1432;BPSS1141
C212	FALSE	BPSL0505;BPSL0632;BPSL3147;BPSL3148;BPSL3149;BPSL3150
C213	TRUE	BPSL1040;BPSL1341;BPSL3130;BPSL3131;BPSL3132;BPSS2208
C214	FALSE	BPSL0860;BPSL0894;BPSL1422;BPSL2601;BPSL2822;BPSL2833
C215	FALSE	BPSL0257;BPSL0258;BPSL0259;BPSL2893;BPSL3316;BPSS0134
C216	TRUE	BPSL0901;BPSL2594;BPSS0004;BPSS0005;BPSS0006;BPSS1772
C217	FALSE	BPSL0381;BPSL0931;BPSL2440;BPSL3271;BPSL3272;BPSL3363
C218	FALSE	BPSL0034;BPSL0337;BPSL0338;BPSL0399;BPSL0400;BPSL1303
C219	TRUE	BPSL3394;BPSS1278;BPSS1282;BPSS1283;BPSS1284;BPSS1285
C220	TRUE	BPSL1951;BPSS1985;BPSS1986;BPSS1987;BPSS1988;BPSS1989
C221	FALSE	BPSL1313;BPSL1314;BPSL1315;BPSS0270;BPSS0505;BPSS1469
C222	TRUE	BPSL0451;BPSL0455;BPSL0456;BPSL0457;BPSL0458;BPSS0845
C223	FALSE	BPSL0339;BPSL0389;BPSL1159;BPSL2635;BPSL2943;BPSS0064
C224	TRUE	BPSL3414;BPSL3415;BPSL3416;BPSL3417;BPSL3418;BPSS0269
C225	FALSE	BPSL0296;BPSL0528;BPSL3068;BPSL3069;BPSL3088;BPSS0856
C226	TRUE	BPSL0572;BPSL0573;BPSL0574;BPSL0574A;BPSS0385;BPSS2076
C227	TRUE	BPSL1638;BPSL1707;BPSL1708;BPSS1057;BPSS1058;BPSS1059
C228	FALSE	BPSL0741;BPSL0742;BPSL0743;BPSL0944;BPSS0386;BPSS1964
C229	TRUE	BPSL0549A;BPSL0756;BPSL1153A;BPSL3113;BPSS0380;BPSS0381
C230	TRUE	BPSL0638;BPSL1276;BPSL1277;BPSL1278;BPSS1783;BPSS1796
C231	FALSE	BPSL1688;BPSL2909;BPSL3353;BPSS0390;BPSS0391;BPSS1047
C232	TRUE	BPSL1647;BPSL1648;BPSL1651;BPSL1652;BPSL1696;BPSL1697
C233	FALSE	BPSL0180;BPSL0181;BPSL0431;BPSL1950;BPSS1034;BPSS1444
C234	TRUE	BPSL3151;BPSL3152;BPSL3153;BPSS0891;BPSS1246;BPSS1556
C235	TRUE	BPSL0459;BPSL0460;BPSL0461;BPSL2412;BPSL2413;BPSL2414
C236	TRUE	BPSS0819;BPSS0820;BPSS0821;BPSS0822;BPSS0823;BPSS0824
C237	FALSE	BPSL1534;BPSL1535;BPSL1536;BPSL1537;BPSS0034;BPSS0048
C238	TRUE	BPSL2384;BPSS0091;BPSS0158;BPSS0675;BPSS0916;BPSS0917
C239	FALSE	BPSL0330;BPSL1072;BPSL1753;BPSS1908;BPSS1909;BPSS1910
C240	TRUE	BPSS0159;BPSS0408;BPSS0409;BPSS0410;BPSS0411;BPSS1555
C241	FALSE	BPSL2842;BPSL2843;BPSL2844;BPSL2845;BPSS0199;BPSS0669
C242	FALSE	BPSL1806;BPSL2630;BPSL3276;BPSS0631;BPSS0876;BPSS1991
C243	TRUE	BPSL1934;BPSL1935;BPSS0192;BPSS2108;BPSS2109;BPSS2126
C244	TRUE	BPSL1189;BPSL1190;BPSL2901;BPSS0348;BPSS0349;BPSS0350
C245	TRUE	BPSL1250;BPSL1957;BPSS0843;BPSS0844;BPSS0853;BPSS1840
C246	TRUE	BPSL1359;BPSL1360;BPSL1361;BPSL1362;BPSL1363;BPSL1364
C247	TRUE	BPSL2307;BPSL2308;BPSL2309;BPSL2310;BPSL2311;BPSL2312
C248	FALSE	BPSS0446;BPSS0568;BPSS0569;BPSS0570;BPSS0858;BPSS1238
C249	TRUE	BPSL0960;BPSL2469;BPSL3422;BPSS0725;BPSS0864;BPSS1260
C250	TRUE	BPSL2054;BPSL2055;BPSS1885;BPSS1886;BPSS1887;BPSS1888
C251	TRUE	BPSL2527;BPSL2528;BPSL2529;BPSL2530;BPSL2531;BPSL2945
C252	TRUE	BPSS0617;BPSS0618;BPSS0619;BPSS0620;BPSS0621;BPSS0622
C253	TRUE	BPSL1256;BPSL1257;BPSL1258;BPSL1259;BPSL1260;BPSL1261
C254	FALSE	BPSL0887;BPSL2238;BPSL3430;BPSL3431;BPSS2003
C255	TRUE	BPSL1059;BPSL1060;BPSL1061;BPSL1062;BPSL1063
C256	FALSE	BPSL0003;BPSL0201;BPSL2731;BPSL2959;BPSS0636
C257	FALSE	BPSL0506;BPSL1105;BPSS1469a;BPSS2027;BPSS2028
C258	TRUE	BPSL0119;BPSL0209;BPSL1861;BPSL2823;BPSL3032
C259	TRUE	BPSL0012;BPSL0013;BPSL0014;BPSL0015;BPSL1017
C260	TRUE	BPSL1181;BPSL1182;BPSL1183;BPSS0848;BPSS2341
C261	FALSE	BPSS0566;BPSS0905;BPSS1365;BPSS1366;BPSS1367
C262	TRUE	BPSL1096;BPSL1963;BPSL2144;BPSL2145;BPSL2146
C263	TRUE	BPSL2041;BPSL3100;BPSL3102;BPSL3103;BPSS2143
C264	FALSE	BPSL0019;BPSL1186;BPSL3076;BPSL3175A;BPSL3176
C265	TRUE	BPSL0504;BPSL1086;BPSL1961;BPSL2828;BPSL2829
C266	TRUE	BPSS1336;BPSS1337;BPSS1338;BPSS1339;BPSS1430
C267	FALSE	BPSL0773;BPSL1130;BPSL1131;BPSS0793;BPSS2160
C268	TRUE	BPSS0194;BPSS0195;BPSS0196;BPSS0197;BPSS0198
C269	TRUE	BPSL0326;BPSS2296;BPSS2299;BPSS2300;BPSS2301
C270	TRUE	BPSL0418;BPSS0283;BPSS0284;BPSS0285;BPSS2116
C271	TRUE	BPSS0897;BPSS0902;BPSS0903;BPSS0904;BPSS0906
C272	TRUE	BPSL2657;BPSL2658;BPSL2659;BPSL2660;BPSL2662
C273	TRUE	BPSL0070;BPSL0292;BPSS0434;BPSS0565;BPSS1217
C274	TRUE	BPSL1846;BPSL2162;BPSL2976;BPSL2977;BPSS1702
C275	FALSE	BPSL0438;BPSL0439;BPSL0467;BPSL2556;BPSL2831
C276	FALSE	BPSL0908;BPSL2562;BPSL2565;BPSL2566;BPSL2841
C277	TRUE	BPSL2287;BPSL2288;BPSL2289;BPSL2290;BPSS1739
C278	TRUE	BPSL0890;BPSL1850;BPSL2471;BPSS0634;BPSS1714
C279	TRUE	BPSS2004;BPSS2005;BPSS2006;BPSS2007;BPSS2147
C280	FALSE	BPSL0785;BPSL1448;BPSL1983;BPSL2104;BPSL2410
C281	TRUE	BPSL2578;BPSL2579;BPSL2580;BPSL2581;BPSL2582
C282	TRUE	BPSL0563;BPSL3342;BPSL3343;BPSL3344;BPSS0648
C283	TRUE	BPSS0072A;BPSS0073;BPSS0075;BPSS0076;BPSS0077
C284	TRUE	BPSL0364;BPSL0365;BPSL0366;BPSL0367;BPSL1377
C285	TRUE	BPSL0654;BPSL0788;BPSL0789;BPSL0790;BPSL2900
C286	FALSE	BPSL1479;BPSL1480;BPSL2866;BPSL3002;BPSL3003
C287	TRUE	BPSL0859;BPSL1440;BPSL2764;BPSL2810;BPSL2811
C288	FALSE	BPSL0794;BPSL0795;BPSS0544;BPSS0862;BPSS2132
C289	TRUE	BPSL0972;BPSL2455;BPSL2456;BPSL2457;BPSL3337
C290	FALSE	BPSL0129;BPSL0558;BPSL0559;BPSS0380A;BPSS0380B
C291	TRUE	BPSS1048a;BPSS1048b;BPSS1048c;BPSS1048d;BPSS1049
C292	TRUE	BPSL0763;BPSL0767;BPSL0768;BPSL0769;BPSL0770
C293	FALSE	BPSL1428;BPSL1429;BPSL1430;BPSL2478;BPSS0267
C294	FALSE	BPSL0193;BPSS0975;BPSS0976;BPSS0977;BPSS1389
C295	FALSE	BPSL0298;BPSL1095;BPSL1938;BPSL1939;BPSL2759
C296	TRUE	BPSS0160;BPSS0161;BPSS0162;BPSS0163;BPSS0164
C297	TRUE	BPSL0999;BPSL1485;BPSL1486;BPSL3314;BPSS0435
C298	TRUE	BPSL1848;BPSL1909;BPSL2650;BPSS1749;BPSS1962
C299	TRUE	BPSL1649;BPSL1650;BPSL1653;BPSL1654;BPSL1706
C300	FALSE	BPSS1493;BPSS1494;BPSS1495;BPSS1514;BPSS1515
C301	TRUE	BPSL1869;BPSS0377;BPSS1855;BPSS1856;BPSS1857
C302	TRUE	BPSS0334;BPSS1320;BPSS1423;BPSS1425;BPSS1426
C303	TRUE	BPSL0368;BPSL0775;BPSL1079;BPSL1834;BPSS0596
C304	TRUE	BPSS1445;BPSS1446;BPSS1447;BPSS1448;BPSS1449
C305	TRUE	BPSS0312;BPSS1131;BPSS1903;BPSS1904;BPSS1905
C306	TRUE	BPSS0167;BPSS0168;BPSS0169;BPSS0170;BPSS1568
C307	TRUE	BPSL0574B;BPSL0575;BPSL0576;BPSL0577;BPSS1076
C308	FALSE	BPSL0564;BPSL0565;BPSL0566;BPSL0567;BPSL0568
C309	FALSE	BPSL0550;BPSL0551;BPSL1145;BPSS0070;BPSS2062
C310	TRUE	BPSS2037;BPSS2038;BPSS2039;BPSS2040;BPSS2041
C311	TRUE	BPSL2023;BPSL2024;BPSL2029;BPSL2030;BPSL2031
C312	TRUE	BPSL1566;BPSL1567;BPSL1568;BPSL1569;BPSS1571
C313	TRUE	BPSS1593;BPSS1594;BPSS1595;BPSS1596;BPSS1597
C314	TRUE	BPSL0681;BPSL0682;BPSL0683;BPSL0684;BPSL0685
C315	TRUE	BPSL0757;BPSL0758;BPSL0759;BPSL0760;BPSL0761
C316	TRUE	BPSL0826;BPSL0827;BPSL0828;BPSL0832;BPSL0840
C317	FALSE	BPSL2752;BPSL2753;BPSL2754;BPSL2755;BPSL2756
C318	TRUE	BPSL2112;BPSL2113;BPSL2114;BPSL2117;BPSL2118
C319	TRUE	BPSL1722;BPSL1723;BPSL1724;BPSL1725;BPSL1726
C320	FALSE	BPSL2142;BPSL3090;BPSL3091;BPSS1280;BPSS2319
C321	TRUE	BPSS0575;BPSS0576;BPSS0577;BPSS0578;BPSS0579
C322	TRUE	BPSS0740;BPSS0804;BPSS1616;BPSS1617;BPSS1623
C323	TRUE	BPSL0007;BPSL0008;BPSL0009;BPSL3123
C324	TRUE	BPSL0341;BPSL0342;BPSL0343;BPSS2199
C325	TRUE	BPSL0262;BPSL0670;BPSL0928;BPSL2479
C326	TRUE	BPSL1964;BPSL2297;BPSL2912;BPSS0890
C327	TRUE	BPSL2672;BPSL2673;BPSL2674;BPSL2675
C328	FALSE	BPSL3121;BPSS1753;BPSS1754;BPSS2080
C329	TRUE	BPSL0088;BPSL0089;BPSL0354;BPSL3389
C330	TRUE	BPSL3162;BPSL3163;BPSL3164;BPSL3165
C331	TRUE	BPSL0409;BPSL0410;BPSL0679;BPSL1867
C332	FALSE	BPSL1030;BPSL1031;BPSL1032;BPSL3140
C333	TRUE	BPSL3288;BPSL3289;BPSL3290;BPSS0488A
C334	TRUE	BPSS1261;BPSS2342;BPSS2343;BPSS2344
C335	TRUE	BPSS0687;BPSS0688;BPSS0689;BPSS0690
C336	TRUE	BPSS0130;BPSS0131;BPSS0132;BPSS0133
C337	TRUE	BPSL1282;BPSL1283;BPSL1284;BPSL1285
C338	FALSE	BPSL2406;BPSL2407;BPSL2467;BPSS2165
C339	TRUE	BPSL0812;BPSL2313;BPSL2314;BPSL3380
C340	TRUE	BPSL1011;BPSS0649;BPSS1152;BPSS1153
C341	TRUE	BPSL1088;BPSL1089;BPSL2544;BPSL2825
C342	TRUE	BPSL0511;BPSL0512;BPSL2007;BPSL2651
C343	TRUE	BPSL0829;BPSL0830;BPSL0831;BPSL0833
C344	TRUE	BPSL1991;BPSL1992;BPSL1993;BPSL3373
C345	TRUE	BPSS0442;BPSS0443;BPSS0444;BPSS0445
C346	TRUE	BPSS1006;BPSS1007;BPSS1008;BPSS1009
C347	TRUE	BPSS0463;BPSS0464;BPSS0465;BPSS0466
C348	TRUE	BPSL2083;BPSL2908;BPSS1816;BPSS1817
C349	TRUE	BPSL1949;BPSS0612;BPSS1116;BPSS1907
C350	TRUE	BPSL0731;BPSL2175;BPSL2248;BPSS0875
C351	TRUE	BPSL0629;BPSL0630;BPSL0631;BPSS2148a
C352	TRUE	BPSL0786;BPSL3297;BPSL3298;BPSS1295
C353	FALSE	BPSL0877;BPSL0918;BPSL0919;BPSL1166
C354	TRUE	BPSL0080;BPSL2319;BPSL3158;BPSL3159
C355	TRUE	BPSL0081;BPSS0502;BPSS1583;BPSS1584
C356	FALSE	BPSL0393;BPSL1357;BPSL1358;BPSL1866
C357	TRUE	BPSL1228;BPSL1229;BPSL2346;BPSL3063
C358	TRUE	BPSL1830;BPSL1831;BPSL1832;BPSL3079
C359	TRUE	BPSL1372;BPSL1373;BPSL1845;BPSL2094
C360	TRUE	BPSL2436;BPSL2750;BPSL2751;BPSL3000
C361	TRUE	BPSS0957;BPSS0958;BPSS0959;BPSS0960
C362	TRUE	BPSL0927;BPSL1921;BPSL1922;BPSS0880
C363	TRUE	BPSL2122;BPSL2123;BPSL2124;BPSS0883
C364	TRUE	BPSL0501;BPSL0502;BPSL0503;BPSS0730
C365	TRUE	BPSL1102;BPSL2190;BPSL3086;BPSS1868
C366	FALSE	BPSL0557;BPSL0557A;BPSL0562;BPSL1074
C367	TRUE	BPSS1145;BPSS1146;BPSS1147;BPSS1335
C368	TRUE	BPSL0470;BPSL0471;BPSL0472;BPSL3077
C369	TRUE	BPSL1802;BPSL1803;BPSL1804;BPSL2237
C370	FALSE	BPSL0263;BPSL0264;BPSL0265;BPSL2182
C371	TRUE	BPSL2425;BPSL2426;BPSL2427;BPSL2862
C372	TRUE	BPSL0984;BPSL0985;BPSL0986;BPSS0218
C373	TRUE	BPSS0382;BPSS1050;BPSS1051;BPSS1052
C374	TRUE	BPSL3118;BPSS0387;BPSS0388;BPSS0389
C375	TRUE	BPSL1155;BPSS2050;BPSS2051;BPSS2052
C376	TRUE	BPSL0548;BPSL2087A;BPSL2088;BPSS0080
C377	FALSE	BPSL3114;BPSL3115;BPSL3270;BPSS0378
C378	TRUE	BPSL0540;BPSL0541;BPSL1109;BPSS0200
C379	TRUE	BPSL0530;BPSL2010;BPSL2623;BPSL2624
C380	TRUE	BPSL0314;BPSL2934;BPSL3013;BPSL3014
C381	TRUE	BPSL0250;BPSL0251;BPSL0692;BPSS0967
C382	TRUE	BPSL2048;BPSL3095;BPSL3096;BPSL3109
C383	TRUE	BPSL2969;BPSL2970;BPSL2971;BPSL2972
C384	TRUE	BPSL1550;BPSL1633;BPSL1634;BPSL1635
C385	TRUE	BPSS0923;BPSS0924;BPSS0925;BPSS0926
C386	TRUE	BPSS0357;BPSS0358;BPSS0359;BPSS0360
C387	TRUE	BPSS0233;BPSS0454;BPSS0455;BPSS0456
C388	FALSE	BPSL1018;BPSL2720;BPSS1113;BPSS1458
C389	TRUE	BPSS0831;BPSS0836;BPSS1140;BPSS1921
C390	TRUE	BPSL0369;BPSL0370;BPSL0371;BPSL2273
C391	TRUE	BPSL0331;BPSL0648;BPSL0649;BPSL0650
C392	TRUE	BPSL0651;BPSL1424;BPSL1425;BPSL1426
C393	TRUE	BPSS1636;BPSS1637;BPSS1638;BPSS1639
C394	TRUE	BPSL1742;BPSL1743;BPSL1744;BPSL1745
C395	TRUE	BPSS0257;BPSS0259;BPSS0260;BPSS0261
C396	TRUE	BPSL1064;BPSL1318;BPSL1319;BPSL1320
C397	FALSE	BPSL0835;BPSL2008;BPSL2330;BPSS2177
C398	TRUE	BPSL1973;BPSS1289;BPSS1292;BPSS1851
C399	TRUE	BPSL1755;BPSL1756;BPSL1757;BPSL1758
C400	TRUE	BPSS0244;BPSS0494;BPSS0495;BPSS0585
C401	TRUE	BPSL0453;BPSL0454;BPSS0086;BPSS1884
C402	TRUE	BPSS1711;BPSS2204;BPSS2205;BPSS2206
C403	TRUE	BPSS1126;BPSS1631;BPSS1632;BPSS1635
C404	TRUE	BPSL0497;BPSL0498;BPSL0499;BPSS0361
C405	TRUE	BPSL0889;BPSL1788;BPSL1789;BPSS0961
C406	TRUE	BPSL3157;BPSS0759;BPSS0760;BPSS0761
C407	TRUE	BPSL0736;BPSL0737;BPSL0738;BPSS2074a
C408	TRUE	BPSL1643;BPSL1644;BPSL1645;BPSL1646
C409	TRUE	BPSL3347;BPSL3348;BPSL3349;BPSL3350
C410	TRUE	BPSL0579;BPSL1389;BPSL2085;BPSS0827
C411	TRUE	BPSL2921;BPSL2922;BPSL2923;BPSL2924
C412	TRUE	BPSS1021;BPSS1022;BPSS1025;BPSS1026
C413	TRUE	BPSL1662;BPSL1663;BPSL1664;BPSL1668
C414	TRUE	BPSL3339;BPSS0171;BPSS0172;BPSS0173
C415	TRUE	BPSL1170;BPSL1171;BPSL1172;BPSL1173
C416	TRUE	BPSS0684;BPSS0685;BPSS0686;BPSS0847
C417	TRUE	BPSL0804;BPSL1882;BPSL1904;BPSL3161
C418	TRUE	BPSL1798;BPSL1799;BPSL1800;BPSL1801
C419	TRUE	BPSL2965;BPSL2966;BPSL2967;BPSL2968
C420	TRUE	BPSS0813;BPSS0814;BPSS0815;BPSS1218
C421	TRUE	BPSL1605;BPSL1608;BPSL1609;BPSL1610
C422	TRUE	BPSL0714;BPSL0716;BPSL0717;BPSL0718
C423	TRUE	BPSS0452;BPSS2279;BPSS2280;BPSS2281
C424	TRUE	BPSL2038;BPSL2039;BPSL2040;BPSL2042
C425	TRUE	BPSS2270;BPSS2271;BPSS2272;BPSS2273
C426	TRUE	BPSL0822;BPSL0823;BPSL0824;BPSL2925
C427	TRUE	BPSL2721;BPSL2722;BPSL2723;BPSL2724
C428	TRUE	BPSL2740;BPSL2741;BPSL2742;BPSL2743
C429	TRUE	BPSL2379;BPSL2380;BPSL2381;BPSL2382
C430	TRUE	BPSL0920;BPSL0921;BPSL0922;BPSL0923
C431	TRUE	BPSL1658a;BPSL1659;BPSL1660;BPSS1111
C432	TRUE	BPSL3019;BPSL3020;BPSL3021;BPSS1769
C433	FALSE	BPSS0430;BPSS1220;BPSS1221;BPSS1990
C434	TRUE	BPSS0285A;BPSS0745;BPSS0746;BPSS0747
C435	TRUE	BPSS0203;BPSS0277;BPSS0278;BPSS0279
C436	TRUE	BPSS0607;BPSS0608;BPSS0609;BPSS0610
C437	TRUE	BPSS1940;BPSS1945;BPSS1946;BPSS2286
C438	TRUE	BPSS0041;BPSS1328;BPSS1329;BPSS1968
C439	FALSE	BPSL3083;BPSS1899;BPSS1900;BPSS1967
C440	TRUE	BPSL2793;BPSL2794;BPSL2795;BPSL2796
C441	TRUE	BPSS0867;BPSS0868;BPSS0869;BPSS0870
C442	TRUE	BPSL1423;BPSL2084;BPSL2163;BPSS0741
C443	TRUE	BPSL1591;BPSS1466;BPSS1467;BPSS1468
C444	TRUE	BPSL1661;BPSL1665;BPSL1666;BPSL1667
C445	TRUE	BPSL2702;BPSL2704;BPSL2705;BPSL2706
C446	TRUE	BPSL1774;BPSL1775;BPSL1776;BPSL1777
C447	TRUE	BPSS0240;BPSS0241;BPSS0242;BPSS0243
C448	TRUE	BPSL1780;BPSS0366;BPSS0367;BPSS0368
C449	TRUE	BPSS0313;BPSS0314;BPSS0315;BPSS0316
C450	TRUE	BPSL1817;BPSL1818;BPSL1819;BPSS1646
C451	TRUE	BPSL2025;BPSL2026;BPSL2027;BPSL2028
C452	TRUE	BPSL2402A;BPSS0129;BPSS0679;BPSS0680
C453	TRUE	BPSL2356;BPSL2357;BPSL2358;BPSS0265
C454	TRUE	BPSL2615;BPSL2616;BPSL2617;BPSL2618
C455	TRUE	BPSS0731;BPSS1477;BPSS1478;BPSS1478a
C456	TRUE	BPSS0140;BPSS0141;BPSS0142;BPSS0143
C457	TRUE	BPSS0291;BPSS0292;BPSS0293;BPSS0294
C458	TRUE	BPSS0321;BPSS0322;BPSS0323;BPSS0324
C459	TRUE	BPSS1236;BPSS1315;BPSS1316;BPSS1317
C460	TRUE	BPSS0762;BPSS0763;BPSS0764;BPSS0765
C461	TRUE	BPSS1030;BPSS1031;BPSS1032
C462	TRUE	BPSS1665;BPSS1666;BPSS1667
C463	FALSE	BPSL1931;BPSL2439;BPSL3331
C464	FALSE	BPSL0114;BPSL0413;BPSL0973
C465	TRUE	BPSL0637;BPSL3119;BPSL3120
C466	FALSE	BPSL2790;BPSL2791;BPSL2792
C467	TRUE	BPSL3413;BPSS0327;BPSS0807
C468	TRUE	BPSL2680;BPSL2681;BPSL2682
C469	FALSE	BPSL3122;BPSL3354;BPSS2133
C470	FALSE	BPSL0965;BPSL1081;BPSL1082
C471	FALSE	BPSL2013;BPSL2014;BPSS0879
C472	FALSE	BPSL3360;BPSL3361;BPSL3362
C473	TRUE	BPSL3097;BPSL3098;BPSL3099
C474	TRUE	BPSL0732;BPSL0733;BPSL1971
C475	FALSE	BPSL1748;BPSS0728;BPSS1742
C476	FALSE	BPSL2980;BPSS0512;BPSS0513
C477	TRUE	BPSL0703;BPSL0704;BPSS1927
C478	TRUE	BPSL0100;BPSL0101;BPSL1309
C479	FALSE	BPSS0896;BPSS0898;BPSS1558
C480	TRUE	BPSS0981;BPSS0982;BPSS0983
C481	TRUE	BPSS1487;BPSS1488;BPSS1489
C482	TRUE	BPSL0061;BPSL0062;BPSL0063
C483	TRUE	BPSL0069;BPSL0071;BPSL0072
C484	FALSE	BPSL2501;BPSL2502;BPSL2503
C485	TRUE	BPSS1286;BPSS1286a;BPSS1287
C486	TRUE	BPSL1873;BPSS1663;BPSS1664
C487	FALSE	BPSL0693;BPSL1249;BPSL1956
C488	FALSE	BPSL2485;BPSL3012;BPSS2348
C489	TRUE	BPSL0110A;BPSL2832;BPSL3035
C490	TRUE	BPSS1204;BPSS1205;BPSS1206
C491	FALSE	BPSL1441;BPSL1533;BPSL2435
C492	FALSE	BPSL0176;BPSL1708A;BPSL1709
C493	TRUE	BPSS2246;BPSS2249;BPSS2250
C494	FALSE	BPSL0237;BPSL0886;BPSL1123b
C495	FALSE	BPSL1269;BPSL3378;BPSS0002
C496	TRUE	BPSL2572;BPSL2573;BPSL2574
C497	TRUE	BPSL0623;BPSL1367;BPSL2694
C498	TRUE	BPSL0252;BPSL0253;BPSL0254
C499	FALSE	BPSL0807;BPSL2480;BPSS1882
C500	FALSE	BPSL0645;BPSL2888;BPSL2889
C501	FALSE	BPSL0117;BPSL0955;BPSL2268
C502	FALSE	BPSL1385;BPSL2570;BPSL2571
C503	FALSE	BPSL0734;BPSL0735;BPSS1862
C504	TRUE	BPSL0375;BPSS0861;BPSS1792
C505	TRUE	BPSL2644;BPSL2645;BPSL2929
C506	FALSE	BPSL2178;BPSL2279;BPSL2420
C507	FALSE	BPSS0247;BPSS0249;BPSS0250
C508	FALSE	BPSL0146;BPSS1087;BPSS2060
C509	TRUE	BPSS2047;BPSS2048;BPSS2075
C510	TRUE	BPSL0554;BPSL0555;BPSL3257
C511	TRUE	BPSL2332;BPSL2333;BPSL2334
C512	FALSE	BPSL2396;BPSL2397;BPSL2399
C513	FALSE	BPSL0912;BPSL0913;BPSS1785
C514	FALSE	BPSL0183;BPSL0184;BPSL0852
C515	TRUE	BPSL1906;BPSL1907;BPSL1908
C516	TRUE	BPSL3145;BPSL3146;BPSS0152
C517	TRUE	BPSL2137;BPSL2266;BPSL2267
C518	FALSE	BPSL1087;BPSL2697;BPSL2698
C519	TRUE	BPSL1196;BPSL1197;BPSL1198
C520	FALSE	BPSL3220;BPSL3221;BPSS0854
C521	TRUE	BPSS2054;BPSS2055;BPSS2056
C522	TRUE	BPSL0286;BPSL0334;BPSL0335
C523	TRUE	BPSL2316;BPSL2317;BPSL2318
C524	TRUE	BPSL3043;BPSL3044;BPSL3045
C525	FALSE	BPSL0919A;BPSL2196;BPSS1090
C526	TRUE	BPSL0217;BPSS0972;BPSS0973
C527	TRUE	BPSL2388;BPSL2389;BPSL2390
C528	TRUE	BPSL0996;BPSL0997;BPSL2474
C529	FALSE	BPSL0705;BPSL1044;BPSL1045
C530	TRUE	BPSL0233;BPSL0234;BPSL0235
C531	TRUE	BPSL1833;BPSL3299;BPSL3300
C532	TRUE	BPSL0243;BPSL0244;BPSL0621
C533	TRUE	BPSL1942;BPSL1943;BPSS1704
C534	TRUE	BPSL1895;BPSL1896;BPSL1897
C535	TRUE	BPSL0441;BPSL2453;BPSL2454
C536	TRUE	BPSL2385;BPSL2386;BPSL2387
C537	TRUE	BPSL0838;BPSS0650;BPSS0651
C538	FALSE	BPSL0587;BPSL0588;BPSL0589
C539	TRUE	BPSL0303;BPSL0304;BPSL0305
C540	TRUE	BPSS1932;BPSS1933;BPSS1934
C541	FALSE	BPSL1106;BPSS0016;BPSS0018
C542	FALSE	BPSS1653;BPSS1654;BPSS2210
C543	TRUE	BPSL1898;BPSL1899;BPSL1900
C544	FALSE	BPSL0348;BPSL0349;BPSS0987
C545	TRUE	BPSL0353;BPSL1626;BPSL1627
C546	TRUE	BPSS0712;BPSS0713;BPSS0714
C547	FALSE	BPSL1147;BPSS2149;BPSS2154
C548	FALSE	BPSL2119;BPSL2120;BPSL2121
C549	FALSE	BPSL1870;BPSL1924;BPSL2558
C550	TRUE	BPSL3334;BPSL3335;BPSL3336
C551	TRUE	BPSS1041;BPSS1042;BPSS1043
C552	TRUE	BPSL2342;BPSL2343;BPSL2344
C553	TRUE	BPSL0419;BPSL0420;BPSL2497
C554	TRUE	BPSS0563;BPSS0564;BPSS0580
C555	TRUE	BPSS1241;BPSS1242;BPSS1243
C556	TRUE	BPSL2101;BPSL2102;BPSS0479
C557	TRUE	BPSL3296;BPSS0633;BPSS0912
C558	FALSE	BPSL2954;BPSL3033;BPSL3034
C559	TRUE	BPSL1450;BPSL1451;BPSL1452
C560	FALSE	BPSL2628;BPSL2765;BPSL2766
C561	TRUE	BPSS1250;BPSS1251;BPSS1252
C562	TRUE	BPSL2048A;BPSL2049;BPSL2050
C563	FALSE	BPSL2646;BPSL2647;BPSS0031
C564	FALSE	BPSL1230;BPSL1231;BPSL1233
C565	TRUE	BPSL2738;BPSL2739;BPSL3256
C566	TRUE	BPSL2583;BPSL2584;BPSL2585
C567	FALSE	BPSS2064;BPSS2065;BPSS2066
C568	TRUE	BPSL2586;BPSL3345;BPSL3346
C569	TRUE	BPSL0764;BPSL0765;BPSL0766
C570	TRUE	BPSL0580;BPSL0581;BPSL1384
C571	TRUE	BPSS0533;BPSS0534;BPSS0535
C572	FALSE	BPSL0842;BPSL0843;BPSL0844
C573	TRUE	BPSL1795;BPSL1796;BPSL1797
C574	TRUE	BPSL0686;BPSL0687;BPSL0688
C575	TRUE	BPSL0712;BPSL0713;BPSS2283
C576	TRUE	BPSL2365;BPSL2366;BPSS0276
C577	TRUE	BPSL1988;BPSL1989;BPSL1990
C578	TRUE	BPSL2415;BPSS1708;BPSS1709
C579	TRUE	BPSS1431;BPSS1432;BPSS1433
C580	TRUE	BPSS1891;BPSS1892;BPSS1893
C581	TRUE	BPSL1192;BPSL1193;BPSL1194
C582	TRUE	BPSL0935;BPSL0936;BPSL0937
C583	TRUE	BPSL0956;BPSL0957;BPSL0958
C584	FALSE	BPSL1837;BPSL1838;BPSL1839
C585	TRUE	BPSL2299;BPSL2300;BPSL2301
C586	TRUE	BPSL1768;BPSL1769;BPSL1770
C587	TRUE	BPSL2745;BPSL2746;BPSL2747
C588	TRUE	BPSL1007;BPSS2159;BPSS2292
C589	TRUE	BPSL2538;BPSL2539;BPSS0191
C590	TRUE	BPSL1051;BPSS0796A;BPSS0797
C591	TRUE	BPSS0061;BPSS0062;BPSS0063
C592	FALSE	BPSS1019;BPSS1460;BPSS1461
C593	TRUE	BPSS2042;BPSS2043;BPSS2044
C594	TRUE	BPSL1619;BPSS1731;BPSS1732
C595	TRUE	BPSS0146;BPSS0147;BPSS0148
C596	TRUE	BPSS0832;BPSS0833;BPSS0834
C597	TRUE	BPSL1292;BPSL1293;BPSL1294
C598	TRUE	BPSS0639;BPSS0640;BPSS0641
C599	TRUE	BPSS0472;BPSS0473;BPSS0474
C600	TRUE	BPSL1559;BPSL1560;BPSL1561
C601	TRUE	BPSS0045;BPSS0046;BPSS0047
C602	TRUE	BPSL2931;BPSL2932;BPSL2933
C603	TRUE	BPSL1683;BPSS2117A;BPSS2118
C604	TRUE	BPSS1894;BPSS1895;BPSS1896
C605	FALSE	BPSL3412;BPSS2266;BPSS2267
C606	TRUE	BPSL2575;BPSL2576;BPSL2577
C607	TRUE	BPSS2119;BPSS2120;BPSS2121
C608	TRUE	BPSL2234;BPSL2235;BPSL2236
C609	TRUE	BPSL2336;BPSL2337;BPSS0469
C610	TRUE	BPSS0394;BPSS0395;BPSS1149
C611	TRUE	BPSS1012;BPSS1013;BPSS1014
C612	TRUE	BPSL2770;BPSL2771;BPSL2772
C613	TRUE	BPSS1214;BPSS1215;BPSS1216
C614	TRUE	BPSL2916;BPSL2917;BPSL2918
C615	TRUE	BPSL3092;BPSL3093;BPSL3094
C616	TRUE	BPSL3171;BPSL3172;BPSL3173
C617	TRUE	BPSS0616;BPSS1589;BPSS1590
C618	TRUE	BPSS0457;BPSS0458;BPSS0459
C619	TRUE	BPSS0515;BPSS0516;BPSS0518
C620	TRUE	BPSS0657;BPSS0664a;BPSS0665
C621	TRUE	BPSS0658;BPSS0659;BPSS0664
C622	TRUE	BPSS0672;BPSS0673;BPSS0674
C623	TRUE	BPSS1786;BPSS1787;BPSS1788
C624	TRUE	BPSS2293;BPSS2294;BPSS2295

## Sheet: (B) Functional enrichment
(B) Functional annotations enriched in highly reproducible clusters
ClusterID	RileyID	Adjusted P-value	Riley Annotation
C001	1.4.1	3.85444e-05	Cell_killing
C001	4.1.3	3.43502e-07	Outer_membrane_constituents
C003	2.2.1	7.56735e-09	Amino_acyl_tRNA_synthesis;_tRNA_modification
C003	2.2.10	0.0265349	Proteins_-_translation_and_modification
C003	2.2.11	0.0295959	RNA_synthesis,_modification,_DNA_transcript'n
C003	3.1.0	0.0481864	Amino_acid_biosynthesis
C003	3.5.5	0.0219279	Glycolysis
C003	3.7.1	2.03413e-05	Purine_ribonucleotide_biosynthesis
C003	4.2.2	1.35509e-40	Ribosomal_proteins_-_synthesis,_modification
C005	4.1.1	0.0063258	Inner_membrane
C006	3.5.1	0.0245986	Aerobic_respiration
C007	2.2.1	0.00288892	Amino_acyl_tRNA_synthesis;_tRNA_modification
C007	4.2.2	0.0390272	Ribosomal_proteins_-_synthesis,_modification
C007	4.2.3	0.000182962	Ribosomes_-_maturation_and_modification
C014	1.2.1	0.00442747	Chromosome_replication
C014	2.2.1	0.00193737	Amino_acyl_tRNA_synthesis;_tRNA_modification
C015	1.1.1	3.49607e-42	Chemotaxis_and_mobility
C016	3.5.1	4.99665e-14	Aerobic_respiration
C016	3.5.8	0.000370782	TCA_cycle
C020	2.2.8	0.000463494	Polysaccharides_-_(cytoplasmic)
C021	1.1.1	9.26944e-25	Chemotaxis_and_mobility
C021	3.6.1	0.0234223	Fatty_acid_and_phosphatidic_acid_biosynthesis
C024	3.8.0	1.24067e-10	Secondary_metabolism
C029	4.1.4	1.14409e-12	Surface_polysaccharides_&_antigens
C030	5.1.5	6.51168e-08	Pathogenicity_Islands/determinants
C034	3.0.0	3.00167e-05	Metabolism_of_small_molecules
C035	5.1.5	1.81958e-30	Pathogenicity_Islands/determinants
C042	4.1.4	0.000670476	Surface_polysaccharides_&_antigens
C045	3.8.0	2.66774e-05	Secondary_metabolism
C050	1.5.5	1.05219e-11	Other_Transport/binding_proteins
C053	5.1.3	4.339e-09	Plasmid-related_functions
C054	1.5.5	6.18189e-18	Other_Transport/binding_proteins
C055	5.1.5	1.05181e-16	Pathogenicity_Islands/determinants
C058	1.1.1	6.07767e-18	Chemotaxis_and_mobility
C059	3.7.1	0.00082436	Purine_ribonucleotide_biosynthesis
C062	1.5.5	1.86886e-10	Other_Transport/binding_proteins
C064	3.1.0	0.000170679	Amino_acid_biosynthesis
C066	1.6.2	0.0186752	Osmotic_adaptation
C066	4.1.0	0.00544465	Periplasmic/exported/lipoproteins
C068	3.6.1	0.00260062	Fatty_acid_and_phosphatidic_acid_biosynthesis
C068	3.8.0	0.00140076	Secondary_metabolism
C071	1.1.1	2.31073e-05	Chemotaxis_and_mobility
C076	1.5.5	0.000415322	Other_Transport/binding_proteins
C078	5.1.2	4.73448e-17	Phage-related_functions_and_prophages
C080	1.5.2	0.000270401	Cations
C084	1.7.1	0.00216895	Cell_division
C084	4.1.2	5.00452e-11	Murein_sacculus,_peptidoglycan
C087	3.8.0	4.82812e-05	Secondary_metabolism
C091	6.3.6	0.0222564	LysR-family
C092	3.2.10	0.00466332	Pantothenate
C096	3.3.21	5.90906e-08	other
C104	1.5.5	3.27441e-09	Other_Transport/binding_proteins
C107	6.3.6	0.0222564	LysR-family
C109	3.2.6	0.000885589	Heme,_porphyrin
C110	5.1.2	0.000127636	Phage-related_functions_and_prophages
C111	5.1.4	0.00296537	Transposon-related_functions
C113	3.5.3	0.00130433	Electron_transport
C113	3.5.9	0.00812222	ATP-proton_motive_force
C116	3.8.0	0.0150122	Secondary_metabolism
C117	6.3.2	2.21023e-05	AraC-family
C120	3.5.8	0.0359775	TCA_cycle
C123	2.2.8	3.43454e-08	Polysaccharides_-_(cytoplasmic)
C126	3.4.5	3.64511e-09	Other_Degradation_of_small_molecules
C129	3.5.2	0.000514335	Anaerobic_respiration
C130	3.5.9	1.87771e-05	ATP-proton_motive_force
C131	1.3.1	0.00111406	Chaperones
C131	2.1.4	3.9194e-05	Degradation_of_proteins,_peptides,_glyco
C133	4.1.4	1.29818e-07	Surface_polysaccharides_&_antigens
C135	3.8.0	1.20178e-08	Secondary_metabolism
C136	2.2.5	0.000388948	Lipopolysaccharide
C138	3.8.0	6.68852e-07	Secondary_metabolism
C139	4.1.4	0.0383082	Surface_polysaccharides_&_antigens
C141	1.2.1	0.0198347	Chromosome_replication
C146	2.2.5	0.00839418	Lipopolysaccharide
C149	1.5.5	1.59017e-05	Other_Transport/binding_proteins
C157	1.4.1	0.0141929	Cell_killing
C159	3.4.4	1.05892e-08	Fatty_acids
C162	3.4.3	0.00620438	Carbon_compounds
C165	3.2.3	0.000152619	Cobalamin
C165	3.2.6	0.000770762	Heme,_porphyrin
C169	1.5.0	0.0011678	Transport/binding_proteins
C172	1.5.5	9.57779e-07	Other_Transport/binding_proteins
C173	3.3.13	2.72456e-15	Phosphorus_compounds
C174	4.1.4	1.29818e-07	Surface_polysaccharides_&_antigens
C177	3.1.0	0.000798075	Amino_acid_biosynthesis
C179	6.3.7	0.0237782	MarR-family
C183	4.1.4	0.0141193	Surface_polysaccharides_&_antigens
C207	4.1.4	0.000467113	Surface_polysaccharides_&_antigens
C209	1.5.3	0.00786542	Carbohydrates,_organic_acids_and_alcohols
C210	5.1.5	8.50847e-07	Pathogenicity_Islands/determinants
C211	1.5.0	0.0239506	Transport/binding_proteins
C224	1.5.1	3.95912e-09	Amino_acids_and_amines
C227	5.1.2	0.000127636	Phage-related_functions_and_prophages
C234	3.2.14	1.84021e-05	Thiamin
C246	1.5.5	0.000257342	Other_Transport/binding_proteins
C247	1.5.4	0.00465228	Anions
C247	3.5.1	8.48755e-06	Aerobic_respiration
C251	3.5.3	9.78977e-05	Electron_transport
C253	3.5.3	6.10334e-07	Electron_transport
C259	1.5.5	0.00402985	Other_Transport/binding_proteins
C268	3.4.5	0.0362814	Other_Degradation_of_small_molecules
C272	1.4.2	1.35372e-08	Detoxification
C279	5.1.4	0.0135144	Transposon-related_functions
C282	5.1.2	0.00460311	Phage-related_functions_and_prophages
C284	3.2.2	4.55275e-10	Biotin
C291	5.1.2	5.69359e-07	Phage-related_functions_and_prophages
C296	1.6.3	8.56473e-05	Fe_storage
C302	1.5.1	0.000671922	Amino_acids_and_amines
C304	3.3.15	0.03613	Pool,_multipurpose_conversions_of_intermed._metm
C305	3.4.3	0.00313558	Carbon_compounds
C305	6.3.11	0.00782756	LuxR_(GerR)-family
C306	1.5.5	0.000841869	Other_Transport/binding_proteins
C310	4.0.0	0.00290391	Cell_envelope
C313	4.1.3	5.70454e-05	Outer_membrane_constituents
C314	3.1.0	0.00206198	Amino_acid_biosynthesis
C316	3.3.15	0.00017902	Pool,_multipurpose_conversions_of_intermed._metm
C321	1.5.1	2.22766e-07	Amino_acids_and_amines
C322	5.1.5	0.000249433	Pathogenicity_Islands/determinants
C327	2.2.5	0.000987984	Lipopolysaccharide
C337	2.2.3	0.00277629	DNA_-_replication,_repair,_restriction/modification
C342	3.5.2	0.0176576	Anaerobic_respiration
C343	1.5.0	0.0239506	Transport/binding_proteins
C346	3.8.0	7.19523e-06	Secondary_metabolism
C367	3.5.2	0.00885853	Anaerobic_respiration
C369	1.5.5	0.0157118	Other_Transport/binding_proteins
C372	3.2.3	4.39949e-06	Cobalamin
C373	5.1.2	0.00117026	Phage-related_functions_and_prophages
C374	5.1.2	0.00460311	Phage-related_functions_and_prophages
C392	3.4.4	0.00563101	Fatty_acids
C393	3.4.3	0.0220909	Carbon_compounds
C394	3.4.2	0.000987984	Amino_acids
C399	3.2.6	0.00017902	Heme,_porphyrin
C403	3.8.0	0.0276526	Secondary_metabolism
C404	1.5.3	0.0179326	Carbohydrates,_organic_acids_and_alcohols
C411	1.5.1	1.23325e-05	Amino_acids_and_amines
C414	1.5.5	0.0157118	Other_Transport/binding_proteins
C415	1.5.2	0.000752614	Cations
C416	3.4.4	0.00563101	Fatty_acids
C418	4.1.5	0.0108596	Surface_structures
C419	1.5.3	0.000925128	Carbohydrates,_organic_acids_and_alcohols
C425	3.4.2	3.24897e-06	Amino_acids
C426	1.5.0	0.0239506	Transport/binding_proteins
C427	1.5.2	0.000752614	Cations
C429	3.5.1	6.91458e-05	Aerobic_respiration
C430	1.5.0	0.0239506	Transport/binding_proteins
C432	1.7.1	0.0130961	Cell_division
C436	3.0.0	8.61439e-07	Metabolism_of_small_molecules
C440	4.1.4	1.39617e-05	Surface_polysaccharides_&_antigens
C447	1.6.3	3.31519e-08	Fe_storage
C452	3.4.5	0.0362814	Other_Degradation_of_small_molecules
C454	1.5.3	0.000925128	Carbohydrates,_organic_acids_and_alcohols
C456	1.5.3	0.000233511	Carbohydrates,_organic_acids_and_alcohols
C457	1.4.3	2.53817e-06	Drug/analog_sensitivity
C461	1.5.3	0.000233511	Carbohydrates,_organic_acids_and_alcohols
C462	3.5.2	1.4906e-05	Anaerobic_respiration
C473	5.1.1	0.000519478	Colicin-related_functions
C478	2.2.3	0.0371647	DNA_-_replication,_repair,_restriction/modification
C480	1.5.1	0.000671922	Amino_acids_and_amines
C482	3.4.4	3.99954e-05	Fatty_acids
C515	3.5.8	0.0036385	TCA_cycle
C519	3.1.0	0.00206198	Amino_acid_biosynthesis
C524	3.4.5	0.00012977	Other_Degradation_of_small_molecules
C533	4.2.3	0.0108746	Ribosomes_-_maturation_and_modification
C535	3.2.9	2.53817e-06	Molybdopterin
C536	3.4.2	0.000249433	Amino_acids
C543	4.1.4	0.0383082	Surface_polysaccharides_&_antigens
C551	1.5.2	0.00018984	Cations
C553	3.4.4	0.0168131	Fatty_acids
C555	3.5.2	0.00296278	Anaerobic_respiration
C559	3.3.5	2.53817e-06	Glyoxylate_bypass
C580	3.4.3	0.000320348	Carbon_compounds
C583	3.3.19	0.00114353	Sulfur_metabolism
C585	3.4.3	0.000320348	Carbon_compounds
C586	3.2.3	0.00404553	Cobalamin
C601	3.4.3	0.000320348	Carbon_compounds
C604	3.5.1	6.91458e-05	Aerobic_respiration
C614	1.6.1	0.000952941	Adaptations,_atypical_conditions
C615	5.1.1	1.53828e-07	Colicin-related_functions
C618	1.4.2	0.0362814	Detoxification
C619	1.5.5	0.0157118	Other_Transport/binding_proteins

## Sheet: (C) MRCNs
(C) List of maximum relatedness of clusters networks (MRCNs) and their constituent clusters.
MRCN	Clusters
M001	C001, C006, C076, C220
M002	C015, C068, C531
M003	C020, C052, C168
M004	C021, C058
M005	C024, C096, C336
M006	C027, C201, C361, C416, C449, C461
M007	C029, C393
M008	C030, C035
M009	C033, C087, C447
M010	C036, C135, C608
M011	C041, C236
M012	C042, C045, C114, C136
M013	C046, C097, C240
M014	C053, C111, C195, C226
M015	C054, C139, C571, C619
M016	C055, C210, C322
M017	C059, C602
M018	C062, C306, C414
M019	C064, C319
M020	C066, C122, C417, C434, C455
M021	C069, C113, C216, C253, C437, C462, C539
M022	C071, C418
M023	C080, C386, C400, C446, C448
M024	C084, C432
M025	C085, C196
M026	C091, C368, C485
M027	C092, C112
M028	C094, C165, C313
M029	C095, C128
M030	C107, C482
M031	C110, C510
M032	C115, C394, C429, C604
M033	C126, C198, C524
M034	C129, C396
M035	C130, C601
M036	C131, C265
M037	C132, C389, C596
M038	C133, C174, C440
M039	C137, C344
M040	C138, C358, C403, C573
M041	C146, C259, C262
M042	C147, C516
M043	C151, C260
M044	C152, C599
M045	C153, C617
M046	C162, C340
M047	C164, C391, C392
M048	C167, C249
M049	C169, C186
M050	C172, C205, C263, C402, C473, C562
M051	C179, C339
M052	C200, C460
M053	C207, C534, C543
M054	C208, C420, C480, C577
M055	C209, C452
M056	C219, C270
M057	C222, C401
M058	C224, C252, C425
M059	C227, C292, C307, C374, C376, C569
M060	C229, C315
M061	C232, C299, C408
M062	C235, C289
M063	C238, C245
M064	C243, C385
M065	C246, C415
M066	C266, C355, C579, C610
M067	C273, C483
M068	C277, C354
M069	C279, C557
M070	C281, C496, C566, C606
M071	C291, C373
M072	C301, C505
M073	C303, C422, C423
M074	C304, C428, C553, C565
M075	C310, C593
M076	C311, C451
M077	C312, C369
M078	C316, C343, C580
M079	C323, C330
M080	C324, C334
M081	C326, C360
M082	C329, C545
M083	C348, C438
M084	C357, C467
M085	C375, C509
M086	C383, C419
M087	C387, C618
M088	C398, C611
M089	C399, C537
M090	C413, C431
M091	C421, C575
M092	C426, C427
M093	C435, C436
M094	C443, C587
M095	C489, C581
M096	C511, C568
M097	C527, C536
M098	C588, C624
